# Supplementary material for: Statistical Power of Model Selection Strategies for Genome-Wide Association Studies
Source: PubMed Central journal article supplement (PMC2712761; doi:10.1371/journal.pgen.1000582), 2009-07-31
Supplement: pgen.1000582.s001.pdf [file pgen.1000582.s001.pdf]

STATISTICAL POWER OF MODEL SELECTION STRATEGIES FOR  
GENOME-WIDE ASSOCIATION STUDIES

Text S1

By Zheyang Wu, Hongyu Zhao

## 1 Proofs and arguments

### 1.1 Proof of the asymptotic distribution results

When  $\nabla h(\boldsymbol{\theta}) \neq \mathbf{0}$ , by Taylor expansion  $h(\bar{\mathbf{Z}}) = h(\boldsymbol{\theta}) + (\bar{\mathbf{Z}} - \boldsymbol{\theta})' (\nabla h(\boldsymbol{\theta}) + R_n(\bar{\mathbf{Z}}, \boldsymbol{\theta}))$ , so

$$\sqrt{n} (h(\bar{\mathbf{Z}}) - h(\boldsymbol{\theta})) = \sqrt{n} (\bar{\mathbf{Z}} - \boldsymbol{\theta})' (\nabla h(\boldsymbol{\theta}) + R_n(\bar{\mathbf{Z}}, \boldsymbol{\theta})).$$

By Central Limit Theory,  $\sqrt{n} (\bar{\mathbf{Z}} - \boldsymbol{\theta}) \xrightarrow{L} N(0, \Sigma)$ , so  $\bar{\mathbf{Z}} \xrightarrow{P} \boldsymbol{\theta}$ , and thus  $R_n(\bar{\mathbf{Z}}, \boldsymbol{\theta}) \xrightarrow{P} 0$ . Following this, we get

$$\begin{aligned} \sqrt{n} (h_1(\bar{\mathbf{Z}}) - h_1(\boldsymbol{\theta})) &\xrightarrow{L} (\nabla h_1(\boldsymbol{\theta}))' N(0, \Sigma), \\ \sqrt{n} (h_2(\bar{\mathbf{Z}}) - h_2(\boldsymbol{\theta})) &\xrightarrow{L} (\nabla h_2(\boldsymbol{\theta}))' N(0, \Sigma), \end{aligned}$$

so that

$$Cov(\sqrt{nh_1}(\bar{\mathbf{Z}}), \sqrt{nh_2}(\bar{\mathbf{Z}})) \xrightarrow{P} (\nabla h_1(\boldsymbol{\theta}))' \Sigma (\nabla h_2(\boldsymbol{\theta})).$$

When  $\nabla h(\boldsymbol{\theta}) = 0$ ,  $h(\bar{\mathbf{Z}}) = h(\boldsymbol{\theta}) + \frac{1}{2} (\bar{\mathbf{Z}} - \boldsymbol{\theta})' D^2 h(\boldsymbol{\theta} + \boldsymbol{\delta}) (\bar{\mathbf{Z}} - \boldsymbol{\theta})$  so that

$$n [h(\bar{\mathbf{Z}}) - h(\boldsymbol{\theta})] = \frac{1}{2} \sqrt{n} (\bar{\mathbf{Z}} - \boldsymbol{\theta})' D^2 h(\boldsymbol{\theta} + \boldsymbol{\delta}) \sqrt{n} (\bar{\mathbf{Z}} - \boldsymbol{\theta}).$$

By Central Limit Theory again,

$$n [h(\bar{\mathbf{Z}}) - h(\boldsymbol{\theta})] \xrightarrow{L} \frac{1}{2} [N(0, \Sigma)]' D^2 h(\boldsymbol{\theta}) [N(0, \Sigma)].$$

Define  $A \equiv D^2 h(\boldsymbol{\theta}) \Sigma$ , if  $A$  is idempotent, we have (by [Searle(1971)], page 57),  $n [h(\bar{\mathbf{Z}}) - h(\boldsymbol{\theta})] \xrightarrow{L} \frac{1}{2} \chi_{rank[A]}^2$ . If  $A$  is not idempotent, by a theorem ([Searle(1971)], page 55),

$$E(n [h(\bar{\mathbf{Z}}) - h(\boldsymbol{\theta})]) \rightarrow \frac{1}{2} tr(A),$$

and

$$Var(n [h(\bar{\mathbf{Z}}) - h(\boldsymbol{\theta})]) \rightarrow \frac{1}{2} tr(A^2).$$

We can use  $c\chi_d^2$  to approximate it ([Scheffé(1959)], page 414) by solving equations  $cd = \frac{1}{2} tr(A)$  and  $2c^2d = \frac{1}{2} tr(A^2)$  for  $c$  and  $d$ .

### 1.2 Decomposition of F-statistics $F_{13}$

First note that the sum of squares can be decomposed as

$$\begin{aligned} SST &= SSM_1 + SSM_{3|1} + SSE_{13}, \\ SSM_{13} &= SSM_1 + SSM_{3|1}, \\ SSE_1 &= SSM_{3|1} + SSE_{13}, \end{aligned}$$

where  $SST$  is the total sum of squares,  $SSM_1$  and  $SSE_1$  are respectively the model sum of squares and error sum of squares for the single SNP model in the article equation (3) involving SNP 1.  $SSM_{13}$  and  $SSE_{13}$  are respectively

the model sum of squares and error sum of squares for the full epistatic model in the article equation (4) involving SNPs 1 and 3.  $SSM_{3|1}$  is the extra variation (sum of squares) explained by the full model compared with the single SNP model. The  $F$ -statistics comparing the two models is

$$F_{3|1} = \frac{(SSM_{13} - SSM_1)/2}{SSE_{13}/(n-4)}.$$

So we have

$$\begin{aligned} F_{13} &= \frac{SSM_{13}/3}{SSE_{13}/(n-4)} \\ &= \frac{n-4}{3} \left[ \frac{SSM_1}{SSE_1} \frac{SSM_{3|1} + SSE_{13}}{SSE_{13}} + \frac{SSM_{3|1}}{SSE_{13}} \right] \\ &= \frac{n-4}{3} \left[ \frac{F_1}{n-2} \left( 1 + \frac{2F_{3|1}}{n-4} \right) + \frac{2F_{3|1}}{n-4} \right] \\ &\rightarrow \frac{1}{3}F_1 + \frac{2}{3}h_1^2(\boldsymbol{\theta})F_{3|1} + \frac{2}{3}F_{3|1}, \end{aligned}$$

since  $\frac{1}{n}F_1 = \frac{1}{n}T_1^2 \xrightarrow{P} h_1^2(\boldsymbol{\theta})$ , where  $h_1(\boldsymbol{\theta})$  is defined in the article equation (8).

### 1.3 Independency dominates sets $S^*$ and $S_2$

In set

$$S^* \equiv \{F_{j|i}, i = 1, 2, j = 3, \dots, p\},$$

$F_{j|1}$  and  $F_{j|2}$  are correlated but  $F_{j|1}$  and  $F_{k|1}$  (or  $F_{k|2}$ ),  $j \neq k$ , are independent. So the average pair-wise correlation within set is decreasing to 0 at the rate of

$$\frac{\# \text{ of correlated pairs within } S_1}{\# \text{ of total pairs within } S_1} = \frac{(p-2)}{\binom{2(p-2)}{2}} = \frac{1}{2p-5}.$$

So as  $p \rightarrow \infty$ , the order statistics and quantiles of  $S^*$  converge to those when the elements in  $S^*$  are independent ([Rawlings(1976)], [David(1981)] Chapter 10.7). Since  $p$  is large in GWAS, we can approximately treat the statistics in  $S^*$  to be independent in the context of power calculation in the article Methods section, where only the order statistics and quantiles are relevant.

There exists a complex correlation structure within  $S_2 \equiv \{F_{jk}, j < k = 3, \dots, p\}$  since all test statistics from the models sharing one common SNP are correlated. However, the average pair-wise correlation within this set is decreasing to 0 at the rate of  $\frac{4}{p-1}$ . Similarly, we approximately treat the statistics in  $S_2$  as being independent when they are considered for null distribution. Furthermore, we assume  $S_1$  and  $S_2$  are independent since the average pair-wise correlation between these two sets is again decreasing to 0 at the rate of  $\frac{1}{p-3}$ .

## 2 Distributions for test statistics

The asymptotic distributions for the relevant test statistics in three model selection methods are derived as following. These formulas are used in the Methods section of the article.

### 2.1 Asymptotic distribution of $T_1$

$T_1$ , the  $T$ -statistic in the simple regression model involving SNP 1 is given by formula

$$T_1 = \frac{(X_1 - \bar{X}_1 \mathbf{1})' Y}{\sqrt{\frac{\|X_1 - \bar{X}_1 \mathbf{1}\|^2}{n-2}}},$$

where  $X_1 = (X_{11}, \dots, X_{n1})'$  is the vector of observed genotypes at SNP 1, with sample mean  $\bar{X}_1 = \frac{1}{n} \sum_{i=1}^n X_{i1}$ .  $I$  is an  $n \times n$  identity matrix,  $P_1 = \mathbf{X}_1 (\mathbf{X}_1' \mathbf{X}_1)^{-1} \mathbf{X}_1'$  is the projection matrix onto the vector space spanned by  $\mathbf{X}_1 = (\mathbf{1}, X_1)$ .  $Y = (Y_1, \dots, Y_n)'$  is the observed trait vector generated by true model in the article equation (2).

Note the constant intercept  $b_0$  does not affect the value of  $T$ - or  $F$ -statistics of the model. So in the following, we assume  $b_0 = 0$ .

To rewrite  $T_1$  as a function of sample means, note that in the numerator of  $T_1$ ,

$$\|X_1 - \bar{X}_1 \mathbf{1}\|^2 = \sum (X_{i1} - \bar{X}_1)^2 = \sum X_{i1}^2 - n\bar{X}_1^2 = n(\overline{X_1^2} - \bar{X}_1^2).$$

and

$$\begin{aligned} (X_1 - \bar{X}_1 \mathbf{1})' Y &= \sum (X_{i1} - \bar{X}_1) (b_1 X_{i1} + b_2 X_{i2} + b_3 X_{i1} X_{i2} + \varepsilon_i) \\ &= n \left( b_1 (\overline{X_1^2} - \bar{X}_1^2) + b_2 (\overline{X_1 X_2} - \bar{X}_1 \bar{X}_2) + b_3 (\overline{X_1^2 X_2} - \bar{X}_1 \overline{X_1 X_2}) + \overline{X_1 \varepsilon} - \bar{X}_1 \bar{\varepsilon} \right), \end{aligned}$$

For the denominator of  $T_1$  we have

$$Y' (I - P_1) Y = Y' \left( I - \frac{J}{n} \right) Y - Y' P_{(X_1 - \bar{X}_1 \mathbf{1})} Y,$$

where  $J = \mathbf{1}\mathbf{1}'$  is the  $n \times n$  matrix of elements 1,  $P_{(X_1 - \bar{X}_1 \mathbf{1})}$  is the projection matrix onto space spanned by vector  $X_1 - \bar{X}_1 \mathbf{1}$ , i.e.

$$P_{(X_1 - \bar{X}_1 \mathbf{1})} = \frac{(X_1 - \bar{X}_1 \mathbf{1}) (X_1 - \bar{X}_1 \mathbf{1})'}{\sum (X_{i1} - \bar{X}_1)^2},$$

and

$$\begin{aligned} Y' \left( I - \frac{J}{n} \right) Y &= (Y - \bar{Y} \mathbf{1})' (Y - \bar{Y} \mathbf{1}) \\ &= n \left\{ \begin{array}{l} b_1^2 (\overline{X_1^2} - \bar{X}_1^2) + 2b_1 b_2 (\overline{X_1 X_2} - \bar{X}_1 \bar{X}_2) + 2b_1 b_3 (\overline{X_1^2 X_2} - \bar{X}_1 \overline{X_1 X_2}) \\ + 2b_1 (\overline{X_1 \varepsilon} - \bar{X}_1 \bar{\varepsilon}) + b_2^2 (\overline{X_2^2} - \bar{X}_2^2) + 2b_2 b_3 (\overline{X_1 X_2^2} - \bar{X}_2 \overline{X_1 X_2}) \\ + 2b_2 (\overline{X_2 \varepsilon} - \bar{X}_2 \bar{\varepsilon}) + b_3^2 (\overline{X_1^2 X_2^2} - \overline{X_1 X_2^2}) + 2b_3 (\overline{X_1 X_2 \varepsilon} - \overline{X_1 X_2} \bar{\varepsilon}) + \bar{\varepsilon}^2 - \bar{\varepsilon}^2 \end{array} \right\}. \end{aligned}$$

So we can rewrite  $T_1$  as a function of sample means

$$T_1 = \sqrt{n-2} h_1(\bar{\mathbf{Z}}),$$

where

$$\mathbf{Z}_i = (\varepsilon, X_{i1}, X_{i1}^2, X_{i2}, X_{i2}^2, X_{i1} X_{i2}, X_{i1}^2 X_{i2}, X_{i1} \varepsilon_i, X_{i1} X_{i2}^2, X_{i1}^2 X_{i2}^2, \varepsilon_i^2, X_{i2} \varepsilon_i, X_{i1} X_{i2} \varepsilon_i).$$

Let the population mean  $\theta = E(\mathbf{Z}_i)$ , under the setup of genotype scale and allele frequency in the article equation (1), the elements of  $\theta$  are:

$$\begin{aligned} E\varepsilon_i &= 0 = EX_1 \varepsilon_i = EX_2 \varepsilon_i = EX_1 X_2 \varepsilon_i, \\ EX_{i1} &= p_1 - q_1, \\ EX_{i1}^2 &= p_1^2 + q_1^2, \\ EX_{i2} &= p_2 - q_2, \\ EX_{i2}^2 &= p_2^2 + q_2^2, \\ EX_{i1} X_{i2} &= (p_1 - q_1)(p_2 - q_2), \\ EX_{i1}^2 X_{i2} &= (p_1^2 + q_1^2)(p_2 - q_2), \\ EX_{i1} X_{i2}^2 &= (p_1 - q_1)(p_2^2 + q_2^2), \\ EX_{i1}^2 X_{i2}^2 &= (p_1^2 + q_1^2)(p_2^2 + q_2^2), \\ E\varepsilon_i^2 &= \sigma^2. \end{aligned}$$

The variance-covariance matrix of the random vector  $\mathbf{Z}_i$  is  $\Sigma = \text{Var}(\mathbf{Z}_i)$ , with the nonzero variance and covariance elements being:

$$\begin{aligned} \text{Var}(\varepsilon_i) &= \sigma^2, \\ \text{Var}(X_{i1}) &= 2p_1 q_1, \\ \text{Var}(X_{i1}^2) &= (p_1^2 + q_1^2) 2p_1 q_1, \\ \text{Var}(X_{i2}) &= 2p_2 q_2, \\ \text{Var}(X_{i2}^2) &= (p_2^2 + q_2^2) 2p_2 q_2, \end{aligned}$$

$$\begin{aligned}
\text{Var}(X_{i1}X_{i2}) &= (p_1^2 + q_1^2)(p_2^2 + q_2^2) - (p_1 - q_1)^2(p_2 - q_2)^2, \\
\text{Var}(X_{i1}^2X_{i2}) &= (p_1^2 + q_1^2)(p_2^2 + q_2^2) - (p_1^2 + q_1^2)^2(p_2 - q_2)^2, \\
\text{Var}(X_{i1}\varepsilon) &= (p_1^2 + q_1^2)\sigma^2, \\
\text{Var}(X_{i1}X_{i2}^2) &= (p_1^2 + q_1^2)(p_2^2 + q_2^2) - (p_1 - q_1)^2(p_2^2 + q_2^2)^2, \\
\text{Var}(X_{i1}^2X_{i2}^2) &= (p_1^2 + q_1^2)(p_2^2 + q_2^2) - (p_1^2 + q_1^2)^2(p_2^2 + q_2^2)^2, \\
\text{Var}(\varepsilon_i^2) &= 2\sigma^4, \\
\text{Var}(X_{i2}\varepsilon_i) &= (p_2^2 + q_2^2)\sigma^2, \\
\text{Var}(X_{i1}X_{i2}\varepsilon_i) &= (p_1^2 + q_1^2)(p_2^2 + q_2^2)\sigma^2, \\
\text{Cov}(\varepsilon_i, X_{i1}\varepsilon_i) &= (p_1 - q_1)\sigma^2, \\
\text{Cov}(\varepsilon_i, X_{i2}\varepsilon_i) &= (p_2 - q_2)\sigma^2, \\
\text{Cov}(\varepsilon_i, X_{i1}X_{i2}\varepsilon_i) &= (p_1 - q_1)(p_2 - q_2)\sigma^2, \\
\text{Cov}(X_{i1}, X_{i1}^2) &= (p_1 - q_1)2p_1q_1, \\
\text{Cov}(X_{i1}, X_{i1}X_{i2}) &= (p_2 - q_2)2p_1q_1, \\
\text{Cov}(X_{i1}, X_{i1}^2X_{i2}) &= (p_1 - q_1)(p_2 - q_2)2p_1q_1, \\
\text{Cov}(X_{i1}, X_{i1}X_{i2}^2) &= (p_2^2 + q_2^2)2p_1q_1, \\
\text{Cov}(X_{i1}, X_{i1}^2X_{i2}^2) &= (p_1 - q_1)(p_2^2 + q_2^2)2p_1q_1, \\
\text{Cov}(X_{i1}^2, X_{i1}X_{i2}) &= (p_1 - q_1)(p_2 - q_2)2p_1q_1, \\
\text{Cov}(X_{i1}^2, X_{i1}^2X_{i2}) &= (p_1^2 + q_1^2)(p_2 - q_2)2p_1q_1, \\
\text{Cov}(X_{i1}^2, X_{i1}X_{i2}^2) &= (p_1 - q_1)(p_2^2 + q_2^2)2p_1q_1, \\
\text{Cov}(X_{i1}^2, X_{i1}^2X_{i2}^2) &= (p_1^2 + q_1^2)(p_2^2 + q_2^2)2p_1q_1, \\
\text{Cov}(X_{i2}, X_{i2}^2) &= (p_2 - q_2)2p_2q_2, \\
\text{Cov}(X_{i2}, X_{i1}X_{i2}) &= (p_1 - q_1)2p_2q_2, \\
\text{Cov}(X_{i2}, X_{i1}^2X_{i2}) &= (p_1^2 + q_1^2)2p_2q_2, \\
\text{Cov}(X_{i2}, X_{i1}X_{i2}^2) &= (p_1 - q_1)(p_2 - q_2)2p_2q_2, \\
\text{Cov}(X_{i2}, X_{i1}^2X_{i2}^2) &= (p_1^2 + q_1^2)(p_2 - q_2)2p_2q_2, \\
\text{Cov}(X_{i2}^2, X_{i1}X_{i2}) &= (p_1 - q_1)(p_2 - q_2)2p_2q_2, \\
\text{Cov}(X_{i2}^2, X_{i1}^2X_{i2}) &= (p_2 - q_2)(p_1^2 + q_1^2)2p_2q_2, \\
\text{Cov}(X_{i2}^2, X_{i1}X_{i2}^2) &= (p_1 - q_1)(p_2^2 + q_2^2)2p_2q_2, \\
\text{Cov}(X_{i2}^2, X_{i1}^2X_{i2}^2) &= (p_1^2 + q_1^2)(p_2^2 + q_2^2)2p_2q_2, \\
\text{Cov}(X_{i1}X_{i2}, X_{i1}^2X_{i2}) &= (p_1 - q_1)(p_2^2 + q_2^2 - (p_2 - q_2)^2(p_1^2 + q_1^2)), \\
\text{Cov}(X_{i1}X_{i2}, X_{i1}X_{i2}^2) &= (p_2 - q_2)(p_1^2 + q_1^2 - (p_1 - q_1)^2(p_2^2 + q_2^2)), \\
\text{Cov}(X_{i1}X_{i2}, X_{i1}^2X_{i2}^2) &= (p_1 - q_1)(p_2 - q_2)(1 - (p_1^2 + q_1^2)(p_2^2 + q_2^2)), \\
\text{Cov}(X_{i1}^2X_{i2}, X_{i1}X_{i2}^2) &= (p_1 - q_1)(p_2 - q_2)(1 - (p_1^2 + q_1^2)(p_2^2 + q_2^2)), \\
\text{Cov}(X_{i1}^2X_{i2}, X_{i1}^2X_{i2}^2) &= (p_1^2 + q_1^2)(p_2 - q_2)(1 - (p_1^2 + q_1^2)(p_2^2 + q_2^2)), \\
\text{Cov}(X_{i1}\varepsilon_i, X_{i2}\varepsilon_i) &= (p_1 - q_1)(p_2 - q_2)\sigma^2, \\
\text{Cov}(X_{i1}\varepsilon_i, X_{i1}X_{i2}\varepsilon_i) &= (p_1^2 + q_1^2)(p_2 - q_2)\sigma^2, \\
\text{Cov}(X_{i1}X_{i2}^2, X_{i1}^2X_{i2}^2) &= (p_1 - q_1)(p_2^2 + q_2^2)(1 - (p_1^2 + q_1^2)(p_2^2 + q_2^2)), \\
\text{Cov}(X_{i2}\varepsilon_i, X_{i1}X_{i2}\varepsilon_i) &= (p_1 - q_1)(p_2^2 + q_2^2)\sigma^2.
\end{aligned}$$

By the asymptotic distribution result in the article equation (5), we can derive (with Mathematica 5 [Wolfram(1999)]) that

$$T_1 - \sqrt{n-2}h_1(\boldsymbol{\theta}) = \sqrt{n-2}(h_1(\bar{\mathbf{Z}}) - h_1(\boldsymbol{\theta})) \xrightarrow{L} N(0, \tau_1^2),$$

where  $h_1(\boldsymbol{\theta})$  is given in the article equation (8),  $\tau_1^2$  is given in Supplementary Note Section 4.1.

## 2.2 Asymptotic distribution for $T_3$

$T_3$  is the T statistic for simple regression model  $\hat{Y}_{i(3)} = \hat{\beta}_{0(3)} + \hat{\beta}_{1(3)}X_{i3}$ :

$$T_3 = \frac{\frac{\sum(X_{i3} - \bar{X}_3)Y_i}{\sqrt{\sum(X_{i3} - \bar{X}_3)^2}}}{\sqrt{\frac{Y'(I - P_3)Y}{n-2}}},$$

where  $\bar{X}_3 = \frac{1}{n} \sum_{i=1}^n X_{i3}$ ,  $P_3 = \mathbf{X}_3 (\mathbf{X}_3' \mathbf{X}_3)^{-1} \mathbf{X}_3'$  is the projection matrix onto the vector space spanned by  $\mathbf{X}_3 = (\mathbf{1}, X_3)'$ .

To rewrite  $T_3$  as a function of sample means, note that  $\sum (X_{i3} - \bar{X}_3)^2 = \sum X_{i3}^2 - n\bar{X}_3^2 = n(\overline{X_3^2} - \bar{X}_3^2)$ . Similarly,

$$\begin{aligned} (X_3 - \bar{X}_3 \mathbf{1})' Y &= (X_3 - \bar{X}_3 \mathbf{1})' (b_1 X_1 + b_2 X_2 + b_3 X_1 X_2 + \varepsilon) \\ &= n (b_1 (\overline{X_1 X_3} - \bar{X}_1 \bar{X}_3) + b_2 (\overline{X_2 X_3} - \bar{X}_2 \bar{X}_3) + b_3 (\overline{X_1 X_2 X_3} - \bar{X}_3 \overline{X_1 X_2}) + \overline{X_3 \varepsilon} - \bar{X}_3 \bar{\varepsilon}). \end{aligned}$$

The projection matrix  $P_3 = P_{(X_3 - \bar{X}_3 \mathbf{1})} + \frac{J}{n}$ , where  $P_{(X_3 - \bar{X}_3 \mathbf{1})}$  is the projection matrix onto space spanned by vector  $X_3 - \bar{X}_3 \mathbf{1}$ , i.e.

$$\begin{aligned} P_{(X_3 - \bar{X}_3 \mathbf{1})} &= (X_3 - \bar{X}_3 \mathbf{1}) \left( (X_3 - \bar{X}_3 \mathbf{1})' (X_3 - \bar{X}_3 \mathbf{1}) \right)^{-1} (X_3 - \bar{X}_3 \mathbf{1})' \\ &= \frac{(X_3 - \bar{X}_3 \mathbf{1}) (X_3 - \bar{X}_3 \mathbf{1})'}{\sum (X_{i3} - \bar{X}_3)^2}. \end{aligned}$$

For the denominator of  $T_3$  we have

$$Y' (I - P_3) Y = Y' \left( I - \frac{J}{n} \right) Y - Y' P_{(X_3 - \bar{X}_3 \mathbf{1})} Y.$$

So we can rewrite  $T_3$  as a function of sample means

$$T_3 = \sqrt{n-2} h_3 (\bar{\mathbf{Z}}),$$

where

$$\mathbf{Z}_i = \begin{pmatrix} \varepsilon_i, X_{i1}, X_{i1}^2, X_{i2}, X_{i2}^2, X_{i1} X_{i2}, X_{i1}^2 X_{i2}, X_{i1} \varepsilon_i, X_{i1} X_{i2}^2, X_{i1}^2 X_{i2}^2, \varepsilon_i^2, X_{i2} \varepsilon_i, X_{i1} X_{i2} \varepsilon_i, X_{i3}, \\ X_{i3}^2, X_{i3} \varepsilon_i, X_{i1} X_{i3}, X_{i2} X_{i3}, X_{i1} X_{i2} X_{i3}, X_{i1}^2 X_{i3}, X_{i1} X_{i3}^2, X_{i1}^2 X_{i3}^2, X_{i1}^2 X_{i2} X_{i3}, X_{i1} X_{i3} \varepsilon_i \end{pmatrix}.$$

Based on the same argument for  $T_1$  above in the Supplementary Note Section 2.1, we have

$$T_j \xrightarrow{L} N(0, 1).$$

### 2.3 Asymptotic distribution for $F_{12}$

Let  $F_{12}$  be the  $F$ -statistics for the full regression model with interaction involving true SNPs 1 and 2.

$$F_{12} = \frac{Y' (P_{12} - \frac{J}{n}) Y}{\frac{3}{Y' (I - P_{12}) Y}},$$

where  $P_{12} = \mathbf{X}_{12} (\mathbf{X}_{12}' \mathbf{X}_{12})^{-1} \mathbf{X}_{12}'$  is the projection matrix onto the vector space spanned by  $\mathbf{X}_{12} = (\mathbf{1}, X_1, X_2, X_1 X_2)$ ,  $X_1 X_2 = (X_{11} X_{12}, \dots, X_{n1} X_{n2})'$ ,  $J = \mathbf{1}\mathbf{1}'$ . Further,  $P_{12} - \frac{J}{n} = \tilde{P}_{12} = \tilde{\mathbf{X}}_{12} (\tilde{\mathbf{X}}_{12}' \tilde{\mathbf{X}}_{12})^{-1} \tilde{\mathbf{X}}_{12}'$  is the projection matrix onto the vector space spanned by  $\tilde{\mathbf{X}}_{12} = (X_1 - \bar{X}_1 \mathbf{1}, X_2 - \bar{X}_2 \mathbf{1}, X_1 X_2 - \overline{X_1 X_2} \mathbf{1})$ , so that

$$\begin{aligned} \tilde{\mathbf{X}}_{12}' Y &= \left( (X_1 - \bar{X}_1 \mathbf{1})' Y, (X_2 - \bar{X}_2 \mathbf{1})' Y, (X_1 X_2 - \overline{X_1 X_2} \mathbf{1})' Y \right) \\ &= n \begin{pmatrix} b_1 (\overline{X_1^2} - \bar{X}_1^2) + b_2 (\overline{X_1 X_2} - \bar{X}_1 \bar{X}_2) + b_3 (\overline{X_1^2 X_2} - \bar{X}_1 \overline{X_1 X_2}) + \overline{X_1 \varepsilon} - \bar{X}_1 \bar{\varepsilon} \\ b_1 (\overline{X_1 X_2} - \bar{X}_1 \bar{X}_2) + b_2 (\overline{X_2^2} - \bar{X}_2^2) + b_3 (\overline{X_1 X_2^2} - \bar{X}_2 \overline{X_1 X_2}) + \overline{X_2 \varepsilon} - \bar{X}_2 \bar{\varepsilon} \\ b_1 (\overline{X_1^2 X_2} - \bar{X}_1 \overline{X_1 X_2}) + b_2 (\overline{X_1 X_2^2} - \bar{X}_2 \overline{X_1 X_2}) + b_3 (\overline{X_1^2 X_2^2} - \bar{X}_1 \overline{X_2^2}) + \overline{X_1 X_2 \varepsilon} - \bar{X}_1 \bar{X}_2 \bar{\varepsilon} \end{pmatrix}, \end{aligned}$$

and

$$\tilde{\mathbf{X}}_{12}' \tilde{\mathbf{X}}_{12} = \begin{pmatrix} \overline{X_1^2} - \bar{X}_1^2 & \overline{X_1 X_2} - \bar{X}_1 \bar{X}_2 & \overline{X_1^2 X_2} - \bar{X}_1 \overline{X_1 X_2} \\ \overline{X_1 X_2} - \bar{X}_1 \bar{X}_2 & \overline{X_2^2} - \bar{X}_2^2 & \overline{X_1 X_2^2} - \bar{X}_2 \overline{X_1 X_2} \\ \overline{X_1^2 X_2} - \bar{X}_1 \overline{X_1 X_2} & \overline{X_1 X_2^2} - \bar{X}_2 \overline{X_1 X_2} & \overline{X_1^2 X_2^2} - \bar{X}_1 \overline{X_2^2} \end{pmatrix}.$$

For the denominator part, since  $X_1P_{12} = X_1$ ,  $X_2P_{12} = X_2$ ,  $X_1X_2P_{12} = X_1X_2$ ,

$$\begin{aligned} Y'(I - P_{12})Y &= \varepsilon'(I - P_{12})\varepsilon \\ &= \varepsilon' \left( I - \frac{J}{n} - \tilde{P}_{12} \right) \varepsilon \\ &= \varepsilon' \left( I - \frac{J}{n} \right) \varepsilon - \varepsilon' \tilde{P}_{12} \varepsilon \\ &= \overline{\varepsilon^2} - \bar{\varepsilon}^2 - \varepsilon' \tilde{\mathbf{X}}_{12} \left( \tilde{\mathbf{X}}'_{12} \tilde{\mathbf{X}}_{12} \right)^{-1} \tilde{\mathbf{X}}'_{12} \varepsilon, \end{aligned}$$

where

$$\tilde{\mathbf{X}}'_{12} \varepsilon = \begin{pmatrix} \overline{X_1 \varepsilon} - \overline{X_1} \bar{\varepsilon} \\ \overline{X_2 \varepsilon} - \overline{X_2} \bar{\varepsilon} \\ \overline{X_1 X_2 \varepsilon} - \overline{X_1 X_2} \bar{\varepsilon} \end{pmatrix}.$$

So  $T_{12} \equiv \sqrt{F_{12}}$  can be written as a function of sample means

$$T_{12} \equiv \sqrt{F_{12}} = \sqrt{n-4} h_{12}(\bar{\mathbf{Z}}),$$

where

$$\mathbf{Z}_i = (\varepsilon_i, X_{i1}, X_{i1}^2, X_{i2}, X_{i2}^2, X_{i1}X_{i2}, X_{i1}^2X_{i2}, X_{i1}\varepsilon_i, X_{i1}X_{i2}^2, X_{i1}^2X_{i2}^2, \varepsilon_i^2, X_{i2}\varepsilon_i, X_{i1}X_{i2}\varepsilon_i).$$

Based on the asymptotic distribution result in (5) in the article, we get

$$T_{12} - \mu_{T_{12}} \xrightarrow{L} N(0, \tau_{T_{12}}^2),$$

where

$$\mu_{T_{12}} = \left( \frac{\frac{2n}{3\sigma^2} (b_1^2 p_1 q_1 + b_3^2 p_1 q_1 (p_2^2 + q_2^2) + 2b_1 b_3 p_1 q_1 (p_2 - q_2))}{+ p_2 q_2 (b_2 + b_3 (p_1 - q_1))^2} \right)^{1/2},$$

and the formula of  $\tau_{T_{12}}^2$  is given in the Supplementary Note Section 3.1.

Also by asymptotic result (6) in the article, we have

$$\begin{aligned} \tau_{12,1} &= Cov(T_{12}, T_1) \xrightarrow{P} [\nabla h_{12}(\boldsymbol{\theta})]' \Sigma [\nabla h_1(\boldsymbol{\theta})], \\ \tau_{12,2} &= Cov(T_{12}, T_2) \xrightarrow{P} [\nabla h_{12}(\boldsymbol{\theta})]' \Sigma [\nabla h_2(\boldsymbol{\theta})], \end{aligned}$$

where  $h_1(\boldsymbol{\theta})$  is given in equation (8) of the article, the formula of  $\tau_{12,1}$  is given in the Supplementary Note Section 3.1.

## 2.4 Asymptotic distribution for $F_{34}$

Let  $F_{34}$  be the  $F$ -statistics for the full interaction regression model fitting  $Y$  with  $X_3$  and  $X_4$ ,

$$F_{34} = \frac{Y'(P_{34} - \frac{J}{n})Y}{\frac{3}{Y'(I - P_{34})Y}},$$

where  $P_{34} = \mathbf{X}_{34} (\mathbf{X}'_{34} \mathbf{X}_{34})^{-1} \mathbf{X}'_{34}$  is the projection matrix onto the vector space spanned by  $\mathbf{X}_{34} = (\mathbf{1}, X_3, X_4, X_3 X_4)'$ .  $P_{34} - \frac{J}{n} = \tilde{P}_{34} = \tilde{\mathbf{X}}_{34} (\tilde{\mathbf{X}}'_{34} \tilde{\mathbf{X}}_{34})^{-1} \tilde{\mathbf{X}}'_{34}$  is the projection matrix onto the vector space spanned by

$$\tilde{\mathbf{X}}_{34} = (X_3 - \bar{X}_3 \mathbf{1}, X_4 - \bar{X}_4 \mathbf{1}, X_3 X_4 - \bar{X}_3 \bar{X}_4 \mathbf{1}),$$

so that the numerator is  $\frac{Y' \tilde{P}_{34} Y}{3}$ , where

$$\begin{aligned} \tilde{\mathbf{X}}'_{34} Y &= \left( (X_3 - \bar{X}_3 \mathbf{1})' Y, (X_4 - \bar{X}_4 \mathbf{1})' Y, (X_3 X_4 - \bar{X}_3 \bar{X}_4 \mathbf{1})' Y \right) \\ &= n \begin{pmatrix} b_1 (\overline{X_1 X_3} - \bar{X}_1 \bar{X}_3) + b_2 (\overline{X_2 X_3} - \bar{X}_2 \bar{X}_3) + b_3 (\overline{X_1 X_2 X_3} - \bar{X}_3 \overline{X_1 X_2}) + \overline{X_3 \varepsilon} - \bar{X}_3 \bar{\varepsilon} \\ b_1 (\overline{X_1 X_4} - \bar{X}_1 \bar{X}_4) + b_2 (\overline{X_2 X_4} - \bar{X}_2 \bar{X}_4) + b_3 (\overline{X_1 X_2 X_4} - \bar{X}_4 \overline{X_1 X_2}) + \overline{X_4 \varepsilon} - \bar{X}_4 \bar{\varepsilon} \\ b_1 (\overline{X_1 X_3 X_4} - \bar{X}_1 \bar{X}_3 \bar{X}_4) + b_2 (\overline{X_2 X_3 X_4} - \bar{X}_2 \bar{X}_3 \bar{X}_4) + b_3 (\overline{X_1 X_2 X_3 X_4} - (\overline{X_1 X_2}) (\overline{X_3 X_4})) + \overline{X_3 X_4 \varepsilon} - \bar{X}_3 \bar{X}_4 \bar{\varepsilon} \end{pmatrix}, \end{aligned}$$

and

$$\tilde{\mathbf{X}}'_{34}\tilde{\mathbf{X}}_{34} = \begin{pmatrix} \overline{X_3^2} - \bar{X}_3^2 & \overline{X_3X_4} - \bar{X}_3\bar{X}_4 & \overline{X_3^2X_4} - \bar{X}_3\overline{X_3X_4} \\ \overline{X_3X_4} - \bar{X}_3\bar{X}_4 & \overline{X_4^2} - \bar{X}_4^2 & \overline{X_3X_4^2} - \bar{X}_4\overline{X_3X_4} \\ \overline{X_3^2X_4} - \bar{X}_3\overline{X_3X_4} & \overline{X_3X_4^2} - \bar{X}_4\overline{X_3X_4} & \overline{X_3^2X_4^2} - \bar{X}_3\bar{X}_4^2 \end{pmatrix}.$$

For the denominator part,

$$Y'(I - P_{34})Y = Y' \left( I - \frac{J}{n} \right) Y - Y'\tilde{P}_{34}Y,$$

where  $Y'(I - \frac{J}{n})Y$  is given in the above Supplementary Note Section 2.1,  $Y'\tilde{P}_{34}Y$  is given in the denominator.

Thus  $F_{34}$  can be rewritten as a function of sample means

$$F_{34} = (n - 4) h_{34}(\bar{\mathbf{Z}}).$$

where

$$\mathbf{Z}_i = \begin{pmatrix} \varepsilon_i, X_{i1}, X_{i1}^2, X_{i2}, X_{i2}^2, X_{i1}X_{i2}, X_{i1}^2X_{i2}, X_{i1}\varepsilon_i, X_{i1}X_{i2}^2, X_{i1}^2X_{i2}^2, \varepsilon_i^2, X_{i2}\varepsilon_i, X_{i1}X_{i2}\varepsilon_i, \\ X_{i3}, X_{i3}^2, X_{i4}, X_{i4}^2, X_{i3}X_{i4}, X_{i3}^2X_{i4}, X_{i3}\varepsilon_i, X_{i3}X_{i4}^2, X_{i3}^2X_{i4}^2, X_{i4}\varepsilon_i, X_{i3}X_{i4}\varepsilon_i, X_{i1}X_{i3}, \\ X_{i2}X_{i3}, X_{i1}X_{i2}X_{i3}, X_{i1}X_{i4}, X_{i2}X_{i4}, X_{i1}X_{i2}X_{i4}, X_{i1}X_{i3}X_{i4}, X_{i2}X_{i3}X_{i4}, X_{i1}X_{i2}X_{i3}X_{i4} \end{pmatrix}.$$

Let  $\boldsymbol{\theta} = E(\mathbf{Z}_i)$ ,  $\Sigma = Var(\mathbf{Z}_i)$  (elements are not given here, but with similar calculation as in the above Supplementary Note Section 2.1). Calculation leads  $h_{34}(\boldsymbol{\theta}) = 0$  and  $\nabla h_{34}(\boldsymbol{\theta}) = 0$ . The vector of eigenvalues of  $D^2h(\boldsymbol{\theta})\Sigma$  is  $(\frac{2}{3}, \frac{2}{3}, \frac{2}{3}, 0, \dots, 0)$ , which indicates that  $\frac{3}{2}D^2h(\boldsymbol{\theta})\Sigma$  is idempotent. By the asymptotic distribution result in (7) of the article,

$$\begin{aligned} F_{34} &= (n - 4) h_{34}(\bar{\mathbf{Z}}) \\ &\xrightarrow{L} \frac{1}{2} \frac{2}{3} \left[ N \left( 0, \sqrt{\frac{3}{2}} \Sigma \right) \right]' D^2h(\boldsymbol{\theta}) \left[ N \left( 0, \sqrt{\frac{3}{2}} \Sigma \right) \right] \\ &\stackrel{(d)}{=} \frac{1}{3} \chi_3^2, \end{aligned}$$

where the last equation is based on a theorem by Searle ([Searle(1971)], page 57).

## 2.5 Asymptotic distribution for $F_{3|1}$

$F_{3|1}$  is the  $F$ -statistic for comparing the full epistatic model

$$\hat{Y}_{i(13)} = \hat{\beta}_{0(13)} + \hat{\beta}_{1(13)}X_{i1} + \hat{\beta}_{2(13)}X_{i3} + \hat{\beta}_{3(13)}X_{i1}X_{i3}, \quad (1)$$

to the single SNP model

$$\hat{Y}_{i(1)} = \hat{\beta}_{0(1)} + \hat{\beta}_{1(1)}X_{i1}.$$

$F_{3|1}$  measures how much variation the full model can explain more than the simple model.

$$F_{3|1} = \frac{(SSM_{13} - SSM_1)/2}{SSE_{13}/(n - 4)},$$

where  $SSM_1 = Y'P_{(X_1 - \bar{X}_1\mathbf{1})}Y$ ,  $SSM_{13} = Y'\tilde{P}_{13}Y = Y'\tilde{\mathbf{X}}_{13} \left( \tilde{\mathbf{X}}'_{13}\tilde{\mathbf{X}}_{13} \right)^{-1} \tilde{\mathbf{X}}'_{13}Y$ , and  $SSE_{13} = Y'(I - P_{13})Y = Y'(I - \frac{J}{n})Y - Y'\tilde{P}_{13}Y$ .

Matrix  $\tilde{\mathbf{X}}_{13} = (X_1 - \bar{X}_1\mathbf{1}, X_3 - \bar{X}_3\mathbf{1}, X_1X_3 - \bar{X}_1\bar{X}_3\mathbf{1})$ , so that

$$\begin{aligned} \tilde{\mathbf{X}}'_{13}Y &= \left( (X_1 - \bar{X}_1\mathbf{1})'Y, (X_3 - \bar{X}_3\mathbf{1})'Y, (X_1X_3 - \bar{X}_1\bar{X}_3\mathbf{1})'Y \right) \\ &= n \begin{pmatrix} b_1 \left( \overline{X_1^2} - \bar{X}_1^2 \right) + b_2 \left( \overline{X_1X_2} - \bar{X}_1\bar{X}_2 \right) + b_3 \left( \overline{X_1^2X_2} - \bar{X}_1\overline{X_1X_2} \right) + \overline{X_1\varepsilon} - \bar{X}_1\bar{\varepsilon} \\ b_1 \left( \overline{X_1X_3} - \bar{X}_1\bar{X}_3 \right) + b_2 \left( \overline{X_2X_3} - \bar{X}_2\bar{X}_3 \right) + b_3 \left( \overline{X_1X_2X_3} - \bar{X}_3\overline{X_1X_2} \right) + \overline{X_3\varepsilon} - \bar{X}_3\bar{\varepsilon} \\ b_1 \left( \overline{X_1^2X_3} - \bar{X}_1\overline{X_1X_3} \right) + b_2 \left( \overline{X_1X_2X_3} - \bar{X}_2\overline{X_1X_3} \right) + b_3 \left( \overline{X_1^2X_2X_3} - \left( \overline{X_1X_2} \right) \left( \overline{X_1X_3} \right) \right) + \overline{X_1X_3\varepsilon} - \bar{X}_1\bar{X}_3\bar{\varepsilon} \end{pmatrix}, \end{aligned}$$

and

$$\tilde{\mathbf{X}}'_{13}\tilde{\mathbf{X}}_{13} = \begin{pmatrix} \overline{X_1^2} - \bar{X}_1^2 & \overline{X_1 X_3} - \bar{X}_1 \bar{X}_3 & \overline{X_1^2 X_3} - \bar{X}_1 \overline{X_1 X_3} \\ \overline{X_1 X_3} - \bar{X}_1 \bar{X}_3 & \overline{X_3^2} - \bar{X}_3^2 & \overline{X_1 X_3^2} - \bar{X}_3 \overline{X_1 X_3} \\ \overline{X_1^2 X_3} - \bar{X}_1 \overline{X_1 X_3} & \overline{X_1 X_3^2} - \bar{X}_3 \overline{X_1 X_3} & \overline{X_1^2 X_3^2} - \bar{X}_1 \bar{X}_3^2 \end{pmatrix}.$$

So we can rewrite

$$F_{3|1} = (n-4) h_{3|1}(\bar{\mathbf{Z}}),$$

where

$$\mathbf{Z}_i = \begin{pmatrix} \varepsilon_i, X_{i1}, X_{i1}^2, X_{i2}, X_{i2}^2, X_{i1}X_{i2}, X_{i1}^2 X_{i2}, X_{i1}\varepsilon_i, X_{i1}X_{i2}^2, X_{i1}^2 X_{i2}^2, \varepsilon_i^2, X_{i2}\varepsilon_i, X_{i1}X_{i2}\varepsilon_i, X_{i3}, \\ X_{i3}^2, X_{i3}\varepsilon_i, X_{i1}X_{i3}, X_{i2}X_{i3}, X_{i1}X_{i2}X_{i3}, X_{i1}^2 X_{i3}, X_{i1}X_{i3}^2, X_{i1}^2 X_{i3}^2, X_{i1}^2 X_{i2}X_{i3}, X_{i1}X_{i3}\varepsilon_i \end{pmatrix}.$$

By calculating  $\boldsymbol{\theta} = E(\mathbf{Z}_i)$  and  $\Sigma = Var(\mathbf{Z}_i)$  (analog to the above Supplementary Note Section 2.1, formulas not listed here), we can derive  $h_{3|1}(\boldsymbol{\theta}) = 0$  and  $\nabla h_{3|1}(\boldsymbol{\theta}) = 0$ . By Taylor expansion and Central Limit Theory,

$$\begin{aligned} F_{3|1} &\rightarrow \frac{1}{2} [\sqrt{n-4}(\bar{\mathbf{Z}} - \boldsymbol{\theta})]' D^2 h_{3|1}(\boldsymbol{\theta}) [\sqrt{n-4}(\bar{\mathbf{Z}} - \boldsymbol{\theta})] \\ &\xrightarrow{L} \frac{1}{2} [N(0, \Sigma)]' D^2 h_{3|1}(\boldsymbol{\theta}) [N(0, \Sigma)]. \end{aligned}$$

Let  $A \equiv D^2 h_{3|1}(\boldsymbol{\theta}) \Sigma$ ,  $rank(A) = 2$ . Unfortunately  $A$  cannot be idempotent since the two eigenvalues, as two function of genetical parameters, are not equal in general. We note that by S.R. Searle ([Searle(1971)], Chapter 2),

$$\begin{aligned} E(F_{3|1}) &\rightarrow \frac{1}{2} tr(D^2(h_{3|1}(\boldsymbol{\theta}_{13})) \boldsymbol{\Sigma}) \equiv e, \\ Var(F_{3|1}) &\rightarrow \frac{1}{2} tr([D^2(h_{3|1}(\boldsymbol{\theta}_{13})) \boldsymbol{\Sigma}]^2) \equiv v. \end{aligned}$$

So the distribution for  $F_{3|1}$  can be approximated by

$$F_{3|1} \stackrel{(d)}{\cong} c\chi_d^2,$$

where  $c = \frac{v}{2e}$ ,  $d = \frac{2e^2}{v}$  ([Scheffé(1959)], Appendix 5). The complicated formula of  $e$  and  $v$ , as functions of genetical parameters, are given in Supplementary Note Section 3.2.

## 2.6 Asymptotic distribution for $(T_1, T_2, T_{1|3}, T_{2|3})'$

$F_{1|3}$  is the F statistic for comparing full epistatic model (1) to single SNP model  $\hat{Y}_{i(3)} = \hat{\beta}_{0(3)} + \hat{\beta}_{1(3)} X_{i3}$ , measuring how much more variation the full model can explain than the simple model. We can write

$$F_{1|3} = \frac{(SSM_{13} - SSM_3)/2}{SSE_{13}/(n-4)},$$

where  $SSM_3 = Y'P_{(X_3 - \bar{X}_{31})}Y$  (calculation is given above in Supplementary Note Section 2.2),  $SSM_{13} = Y'\tilde{P}_{13}Y = Y'\tilde{\mathbf{X}}_{13}(\tilde{\mathbf{X}}'_{13}\tilde{\mathbf{X}}_{13})^{-1}\tilde{\mathbf{X}}'_{13}Y$ , and  $SSE_{13} = Y'(I - P_{13})Y = Y'(I - \frac{J}{n})Y - Y'\tilde{P}_{13}Y$ . The calculation for  $SSM_{13}$  and  $SSE_{13}$  is given above in Supplementary Note Section 2.5.

Define

$$T_{1|3} \equiv \sqrt{F_{1|3}} = \sqrt{n-4}h_{1|3}(\bar{\mathbf{Z}}),$$

by the asymptotic distribution result (5) given in the article, we can derive

$$T_{1|3} - \mu_{T_{1|3}} \xrightarrow{L} N\left(0, \tau_{T_{1|3}}^2\right),$$

where

$$\mu_{T_{1|3}} = \left( \frac{np_1q_1(b_1 + b_3(p_2 - q_2))^2}{2p_2q_2((b_2 + b_3p_1)^2 - 2b_2b_3q_1 + b_3^2q_1^2) + \sigma^2} \right)^{1/2},$$



the formula of  $\tau_{T_{1|3}}^2$  is given in Supplementary Note Section 4.3.

Similarly,

$$F_{2|3} = \frac{(SSM_{23} - SSM_3)/2}{SSE_{23}/(n-4)},$$

where  $SSM_{23} = Y' \tilde{P}_{23} Y = Y' \tilde{\mathbf{X}}_{23} (\tilde{\mathbf{X}}_{23}' \tilde{\mathbf{X}}_{23})^{-1} \tilde{\mathbf{X}}_{23}' Y$ , and  $SSE_{23} = Y' (I - P_{23}) Y = Y' (I - \frac{J}{n}) Y - Y' \tilde{P}_{23} Y$  with matrix  $\tilde{\mathbf{X}}_{23} = (X_2 - \bar{X}_2 \mathbf{1}, X_3 - \bar{X}_3 \mathbf{1}, X_2 X_3 - \bar{X}_2 \bar{X}_3 \mathbf{1})$ , so that

$$\begin{aligned} \tilde{\mathbf{X}}_{23}' Y &= \left( (X_2 - \bar{X}_2 \mathbf{1})' Y, (X_3 - \bar{X}_3 \mathbf{1})' Y, (X_2 X_3 - \bar{X}_2 \bar{X}_3 \mathbf{1})' Y \right) \\ &= n \begin{pmatrix} b_1 (\overline{X_1 X_2} - \bar{X}_1 \bar{X}_2) + b_2 (\overline{X_2^2} - \bar{X}_2^2) + b_3 (\overline{X_1 X_2^2} - \bar{X}_2 \bar{X}_1 \bar{X}_2) + \overline{X_2 \varepsilon} - \bar{X}_2 \bar{\varepsilon} \\ b_1 (\overline{X_1 X_3} - \bar{X}_1 \bar{X}_3) + b_2 (\overline{X_2 X_3} - \bar{X}_2 \bar{X}_3) + b_3 (\overline{X_1 X_2 X_3} - \bar{X}_3 \bar{X}_1 \bar{X}_2) + \overline{X_3 \varepsilon} - \bar{X}_3 \bar{\varepsilon} \\ b_1 (\overline{X_1 X_2 X_3} - \bar{X}_1 \bar{X}_2 \bar{X}_3) + b_2 (\overline{X_2^2 X_3} - \bar{X}_2 \bar{X}_2 \bar{X}_3) + b_3 (\overline{X_1 X_2^2 X_3} - (\bar{X}_1 \bar{X}_2) (\bar{X}_2 \bar{X}_3)) + \overline{X_2 X_3 \varepsilon} - \bar{X}_2 \bar{X}_3 \bar{\varepsilon} \end{pmatrix}, \end{aligned}$$

and

$$\tilde{\mathbf{X}}_{23}' \tilde{\mathbf{X}}_{23} = \begin{pmatrix} \overline{X_2^2} - \bar{X}_2^2 & \overline{X_2 X_3} - \bar{X}_2 \bar{X}_3 & \overline{X_2^2 X_3} - \bar{X}_2 \bar{X}_2 \bar{X}_3 \\ \overline{X_2 X_3} - \bar{X}_2 \bar{X}_3 & \overline{X_3^2} - \bar{X}_3^2 & \overline{X_2 X_3^2} - \bar{X}_3 \bar{X}_2 \bar{X}_3 \\ \overline{X_2^2 X_3} - \bar{X}_2 \bar{X}_2 \bar{X}_3 & \overline{X_2 X_3^2} - \bar{X}_3 \bar{X}_2 \bar{X}_3 & \overline{X_2^2 X_3^2} - \bar{X}_2 \bar{X}_3^2 \end{pmatrix}.$$

Define

$$T_{2|3} \equiv \sqrt{F_{2|3}} = \sqrt{n-4} h_{2|3}(\bar{\mathbf{Z}}),$$

by the asymptotic distribution result (5) given in the article, we can derive

$$T_{2|3} - \mu_{T_{2|3}} \xrightarrow{L} N\left(0, \tau_{T_{2|3}}^2\right),$$

where the formulas of  $\mu_{T_{2|3}}$  and  $\tau_{T_{2|3}}^2$  are analogous to  $\mu_{T_{1|3}}$  and  $\tau_{T_{1|3}}^2$ .

More generally,  $(T_1, T_2, T_{1|3}^2, T_{2|3}^2)'$  has multivariate normal distribution

$$(T_1, T_2, T_{1|3}, T_{2|3})' - \boldsymbol{\mu}_{T_1, T_2, T_{1|3}, T_{2|3}} \xrightarrow{L} MVN(\mathbf{0}, \boldsymbol{\tau}_{T_1, T_2, T_{1|3}, T_{2|3}}), \quad (2)$$

with

$$\begin{aligned} \tau_{1|3,2|3} &= Cov(T_{2|3}, T_{1|3}) \xrightarrow{P} [\nabla h_{1|3}(\boldsymbol{\theta})]' \Sigma [\nabla h_{2|3}(\boldsymbol{\theta})], \\ \tau_{1|3,1} &= Cov(T_1, T_{1|3}) \xrightarrow{P} [\nabla h_{1|3}(\boldsymbol{\theta})]' \Sigma [\nabla h_1(\boldsymbol{\theta})], \\ \tau_{1|3,2} &= Cov(T_2, T_{1|3}) \xrightarrow{P} [\nabla h_{1|3}(\boldsymbol{\theta})]' \Sigma [\nabla h_2(\boldsymbol{\theta})], \\ \tau_{2|3,1} &= Cov(T_1, T_{2|3}) \xrightarrow{P} [\nabla h_{2|3}(\boldsymbol{\theta})]' \Sigma [\nabla h_1(\boldsymbol{\theta})], \\ \tau_{2|3,2} &= Cov(T_2, T_{2|3}) \xrightarrow{P} [\nabla h_{2|3}(\boldsymbol{\theta})]' \Sigma [\nabla h_2(\boldsymbol{\theta})], \end{aligned}$$

where  $h_1(\boldsymbol{\theta})$  and  $h_2(\boldsymbol{\theta})$  are given in the above Supplementary Note Section 2.1. The formulas of  $\tau_{1|3,1}$ ,  $\tau_{1|3,2}$ , and  $\tau_{1|3,2|3}$  are given in Supplementary Note Section 4.3.

Furthermore, we have

$$Cov(T_3, T_{1|3}) \xrightarrow{P} [\nabla h_{1|3}(\boldsymbol{\theta})]' \Sigma [\nabla h_3(\boldsymbol{\theta})] = 0.$$

As  $T_3$  and  $T_{1|3}$  are normal, they are independent. So  $T_3$  and  $F_{1|3}$  are also independent.

## 2.7 Asymptotic distribution for $F_{4|3}$

The asymptotic distribution of  $F_{4|3}$  is calculated as following.

$$F_{4|3} = \frac{(SSM_{34} - SSM_3)/2}{SSE_{34}/(n-4)},$$

where  $SSM_3 = Y'P_{(X_3 - \bar{X}_{31})}Y$  is given above in Supplementary Note Section 2.2,  $SSM_{34} = Y'(P_{34} - \frac{J}{n})Y$ ,  $SSE_{34} = Y'(I - P_{34})Y$  are given above in Supplementary Note Section 2.4.

We can rewrite

$$F_{4|3} = (n - 4) h_{4|3}(\bar{\mathbf{Z}}),$$

where  $\mathbf{Z}_i$  is the same as given above in Supplementary Note Section 2.4. We get that  $h_{4|3}(\boldsymbol{\theta}) = 0$  and the vector of eigenvalues of  $D^2h(\boldsymbol{\theta})\Sigma$  is  $(1, 1, 0, \dots, 0)$ . This indicates that  $D^2h(\boldsymbol{\theta})\Sigma$  is idempotent. By the asymptotic distribution result (7) in the article,

$$\begin{aligned} F_{4|3} &= (n - 4) h(\bar{\mathbf{Z}}) \\ &\xrightarrow{L} \frac{1}{2} [N(0, \Sigma)]' D^2h(\boldsymbol{\theta}) [N(0, \Sigma)] \\ &\stackrel{(d)}{=} \frac{1}{2} \chi^2_2. \end{aligned}$$

## References

- [David(1981)] H. David. Order Statistics. *New York*, 1981.
- [Rawlings(1976)] J. Rawlings. Order statistics for a special class of unequally correlated multinormal variates. *Biometrics*, 32(4):875–887, 1976.
- [Scheffé(1959)] H. Scheffé. *The Analysis of Variance*. John Wiley & Sons Inc, 1959.
- [Searle(1971)] S. Searle. Linear Models. *New York*, 1971.
- [Wolfram(1999)] S. Wolfram. *The Mathematica Book*. Cambridge University Press, 1999.

### 3 Comparison of power for model selection methods

Assume the true genetic model is a two-marker epistatic model given in equation (2) in the article. Setting the number of observations  $n = 100$ , the number of scanned SNPs  $p = 1000$ , and the variance of random error  $\sigma^2 = 3$ , the following figures demonstrate values and comparisons of power for marginal selection, forward selection, and exhaustive search while controlling the number of false discoveries at  $R = 1, 5$ , and  $10$ . Two minor allele frequencies are studied:  $q_j = 0.5$  (Figures S1 - S4) and  $0.3$  (Figures S5 - S8). Genetic effects ( $b_1 = b_2$  and  $b_3$ ) vary from  $-2$  to  $2$  by a step size of  $0.2$ . Power values of model selection methods are calculated and compared under two definitions: (A) finding the exact true underlying genetic model (or both SNPs in the case of marginal selection) (Figures S1, S3, S5, S7); (B): finding at least one of the true underlying SNPs (Figures S2, S4, S6, S8).

Figure S1. 3D plots of power under definition (A),  $q_j = 0.5$ ,  $R = 1, 5, 10$  (row 1-3).

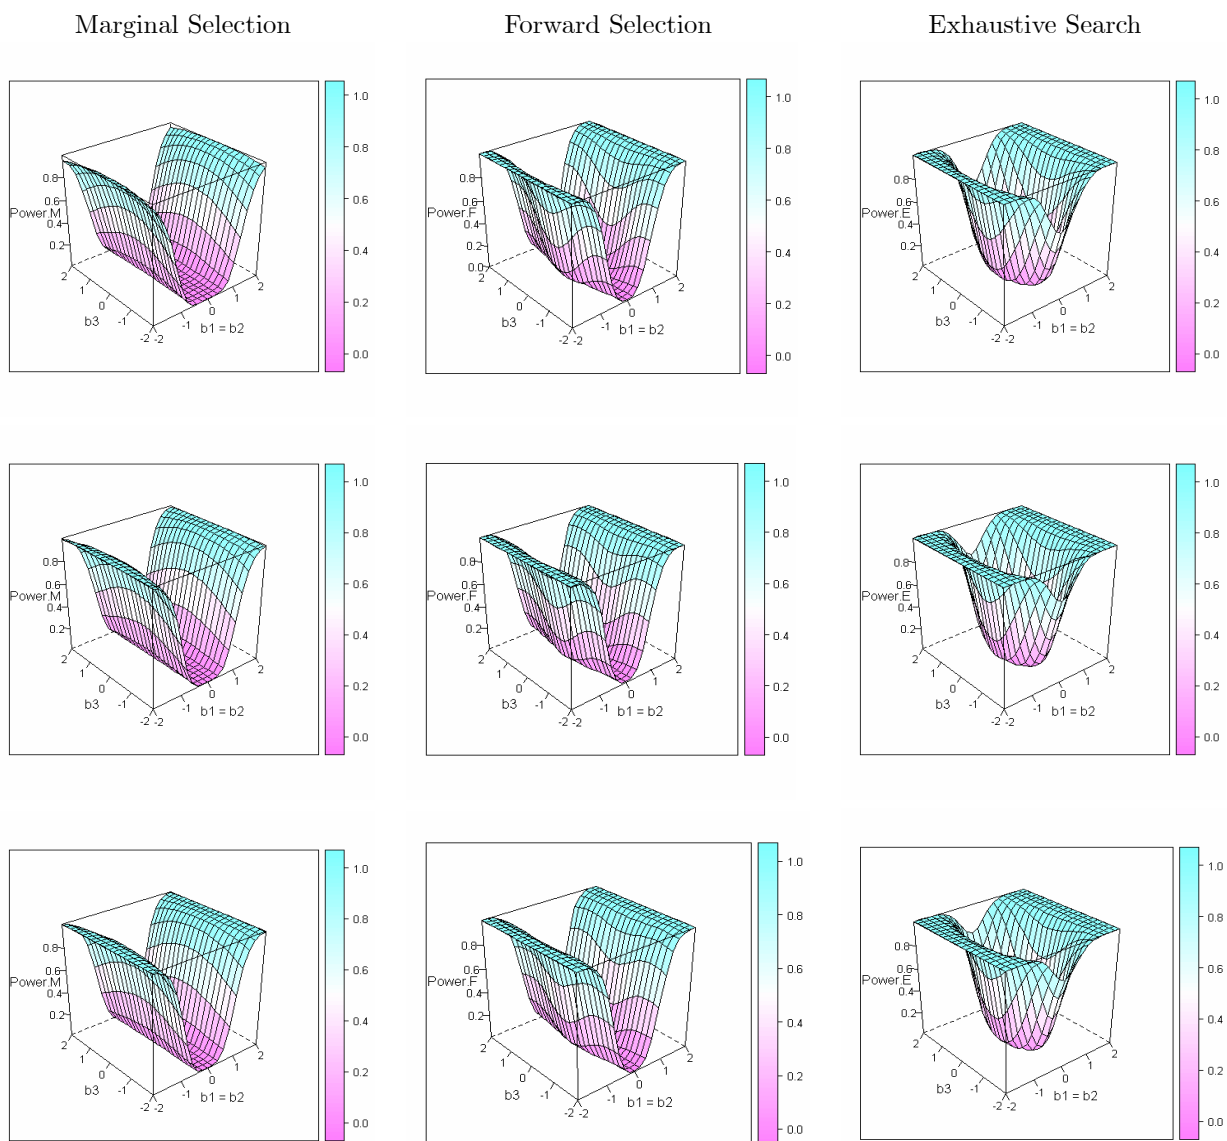

Figure S2. 3D plots of power under definition (B),  $q_j = 0.5$ ,  $R = 1, 5, 10$  (row 1-3).

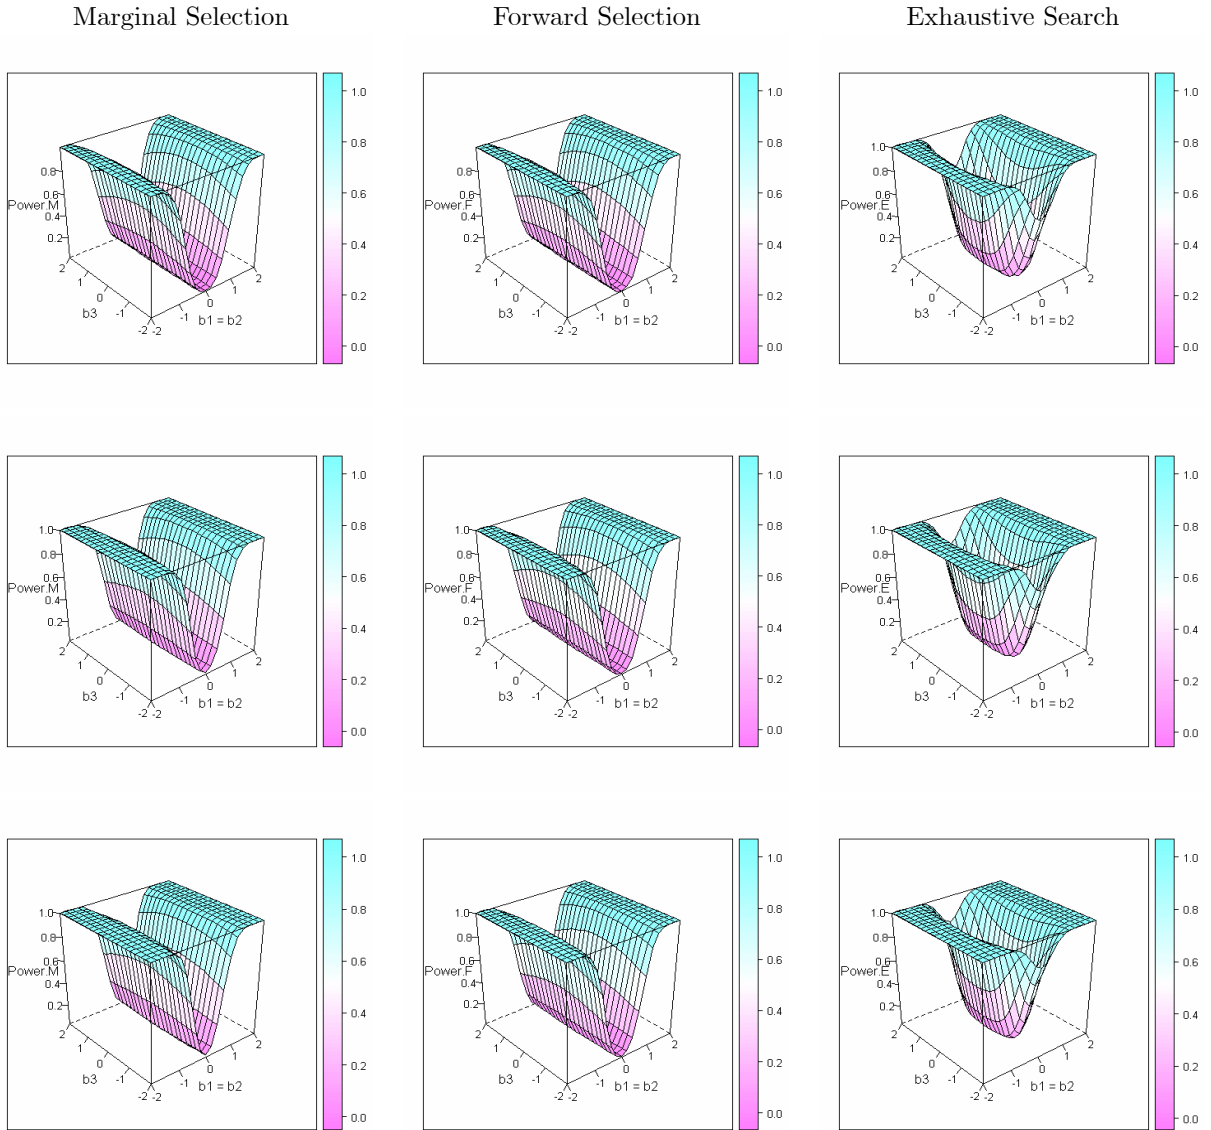

Figure S3. Power comparisons under definition (A),  $q_j = 0.5$ ,  $R = 1, 5, 10$  (row 1-3).

Marginal - Exhaustive

Forward - Exhaustive

Marginal - Forward

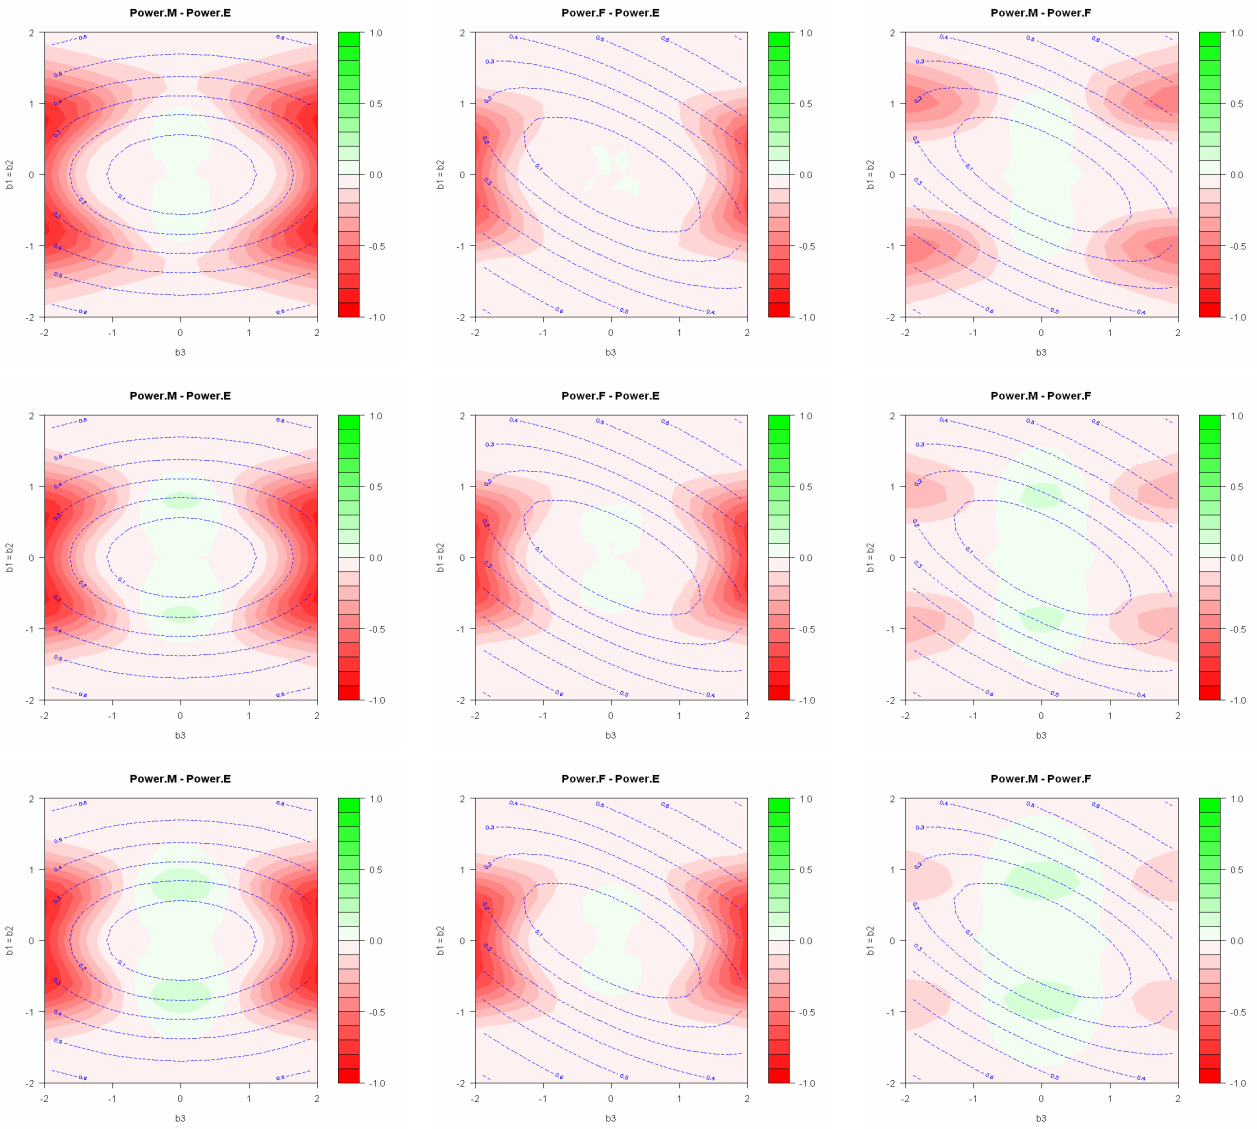

Figure S4. Power comparisons under definition (B),  $q_j = 0.5$ ,  $R = 1, 5, 10$  (row 1-3).

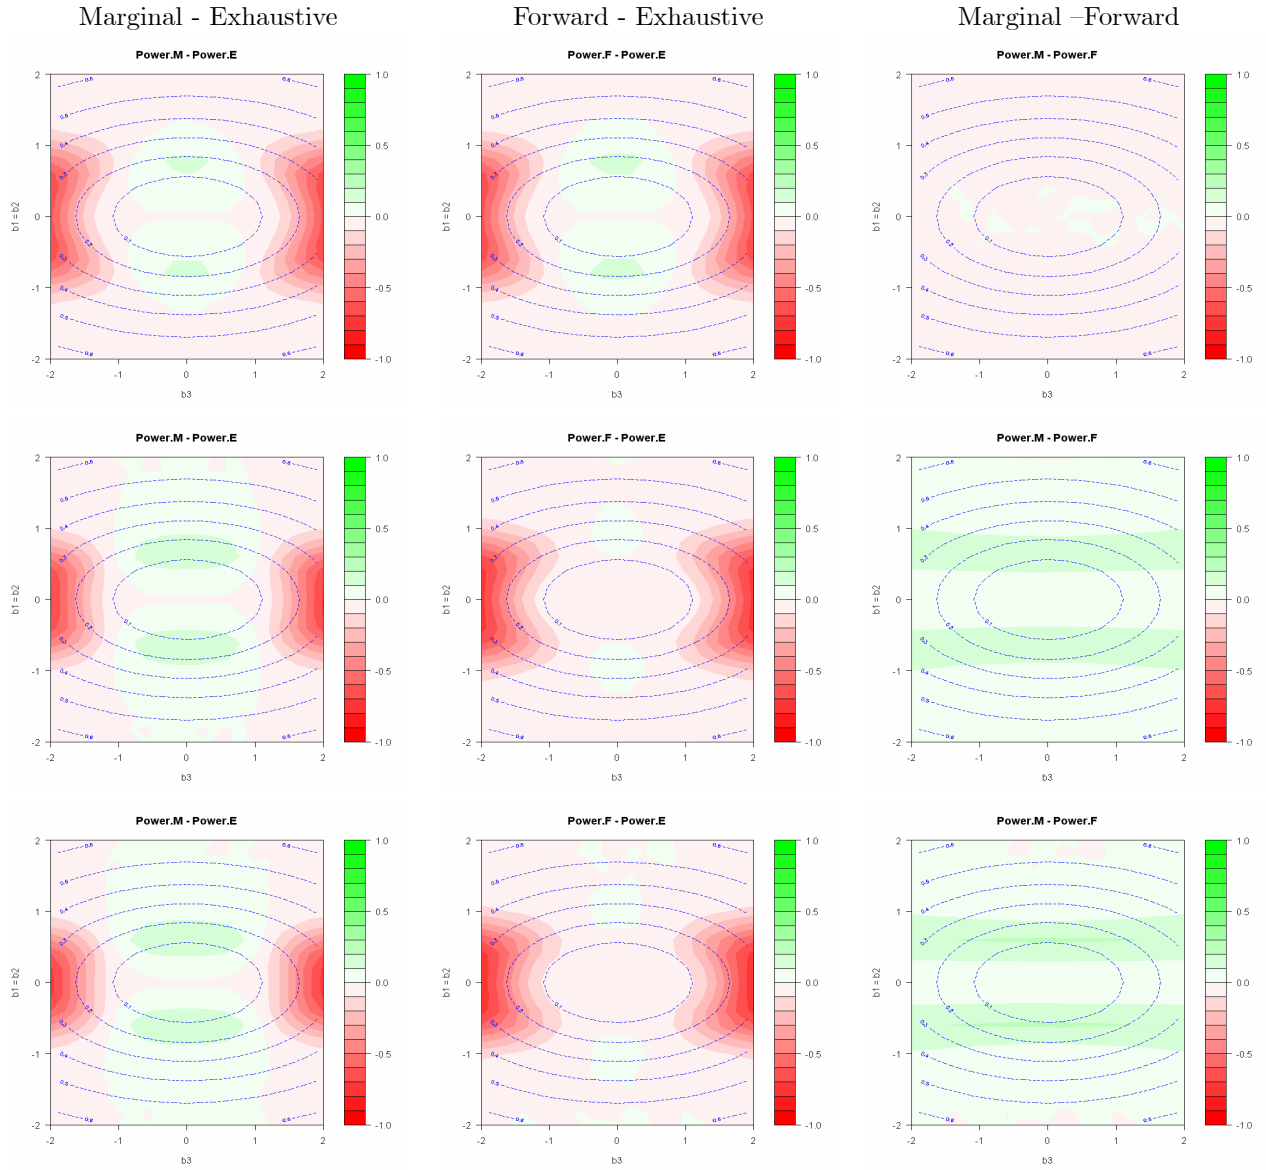

Figure S5. 3D plots of power under definition (A),  $q_j = 0.3$ ,  $R = 1, 5, 10$  (row 1-3).

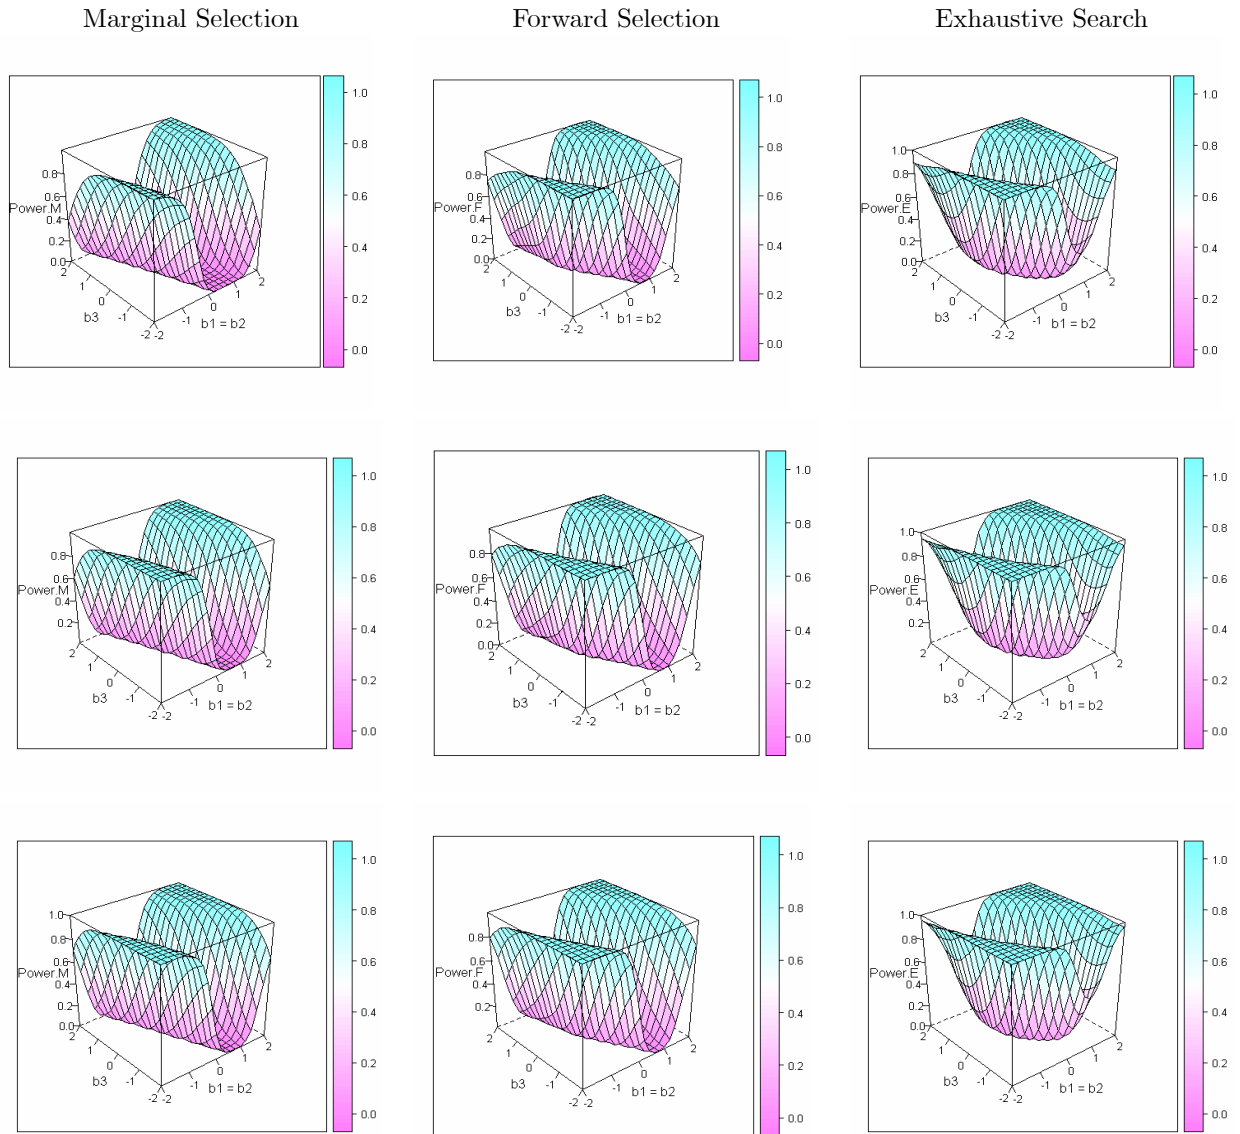



Figure S6. 3D plots of powers under definition (B),  $q_j = 0.3$ ,  $R = 1, 5, 10$  (row 1-3).

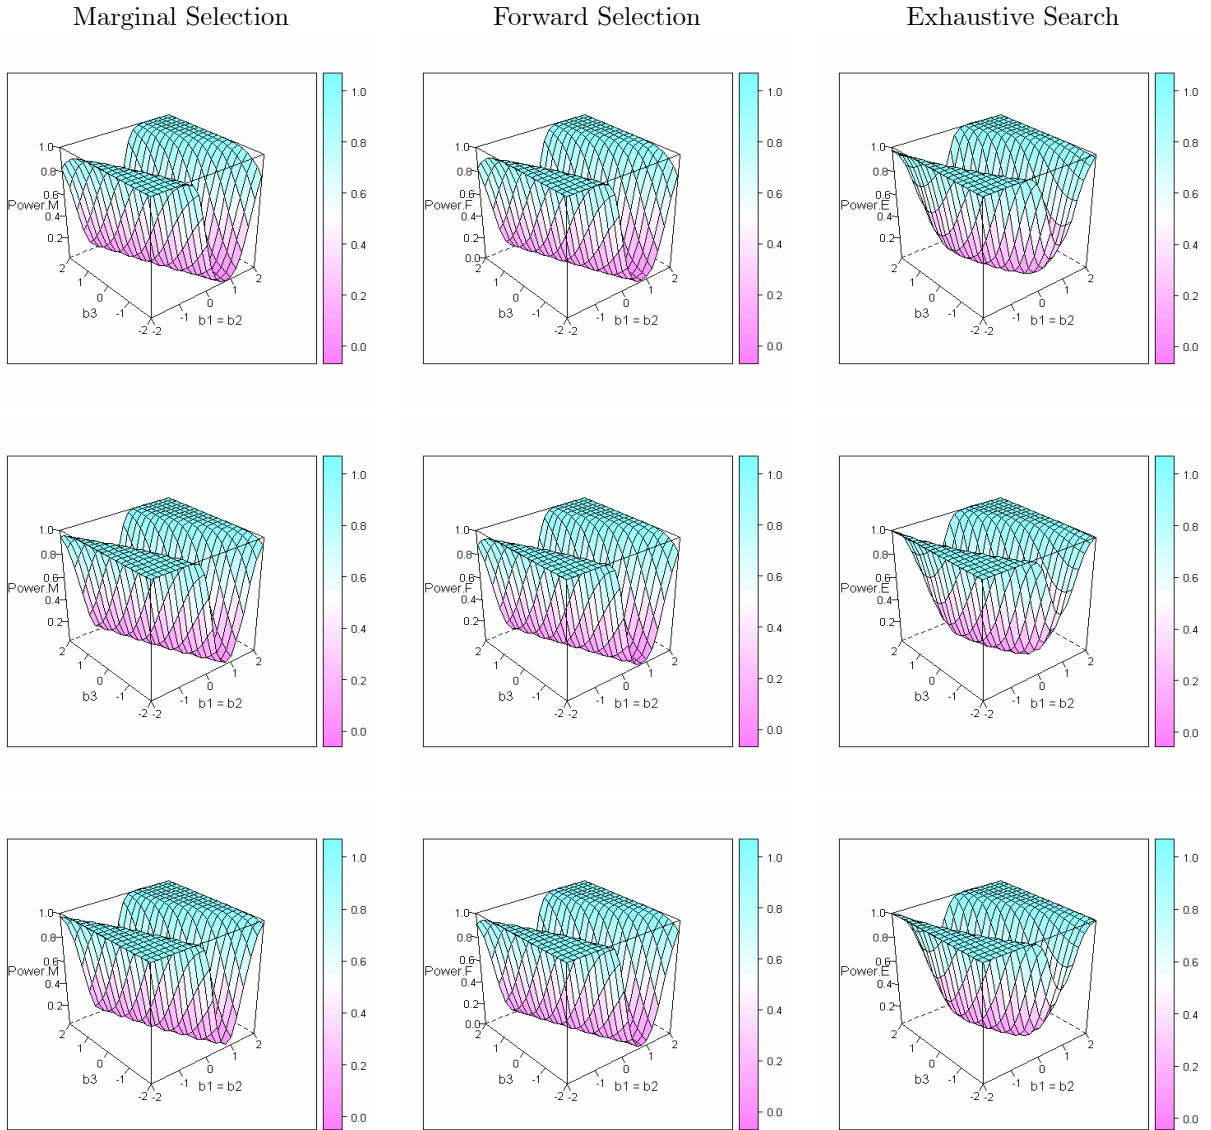

Figure S7. Power comparisons under definition (A),  $q_j = 0.3$ ,  $R = 1, 5, 10$  (row 1-3).

Marginal - Exhaustive

Forward - Exhaustive

Marginal - Forward

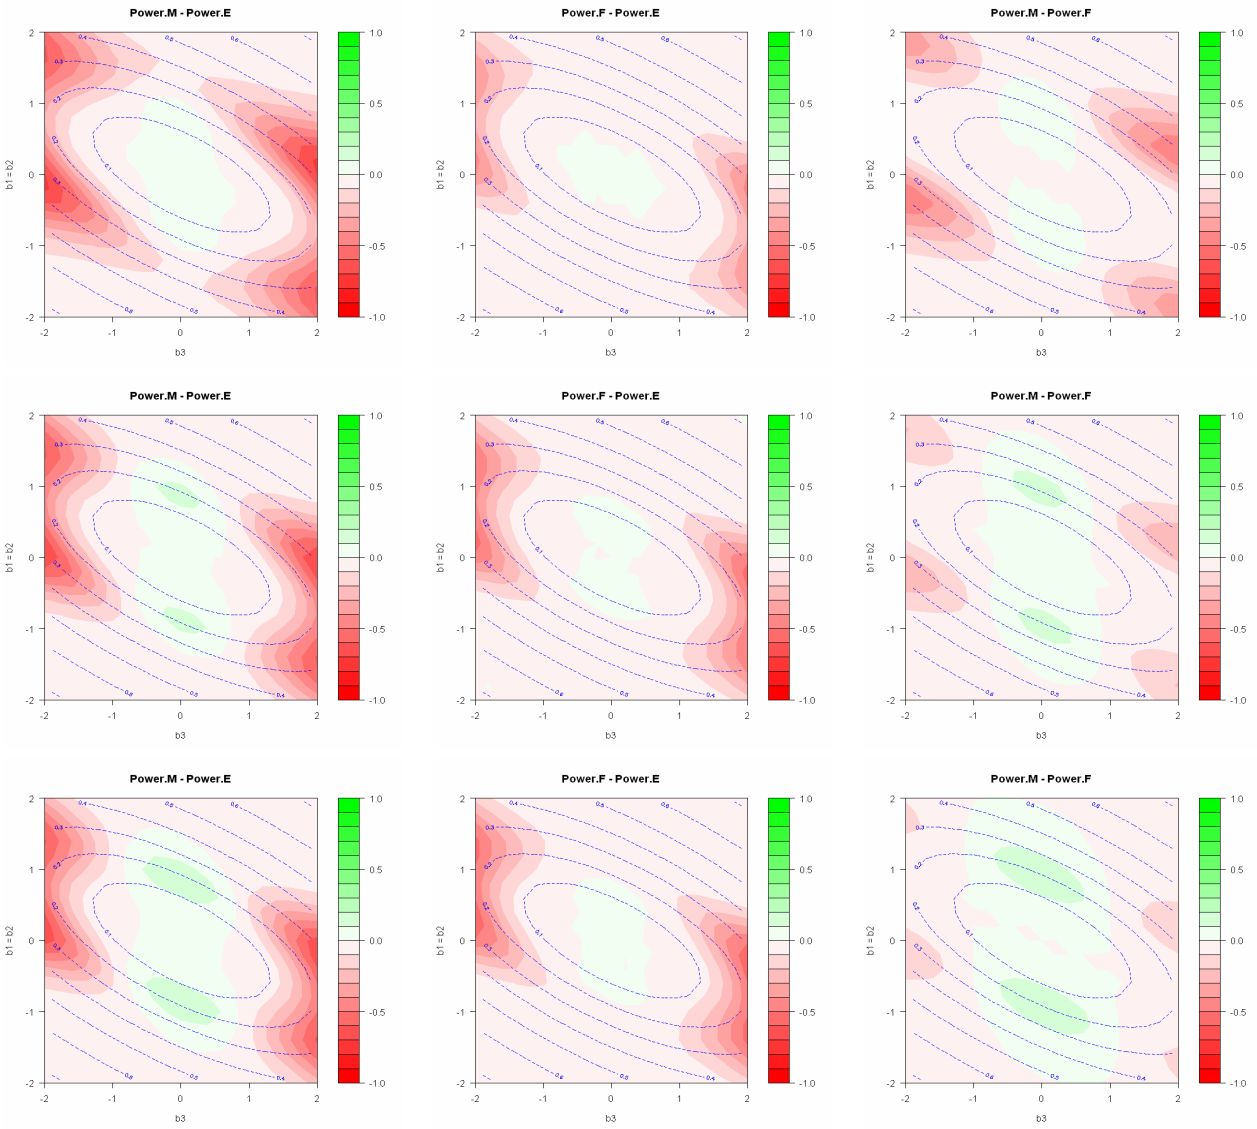

Figure S8. Power comparisons under definition (B),  $q_j = 0.3$ ,  $R = 1, 5, 10$  (row 1-3).

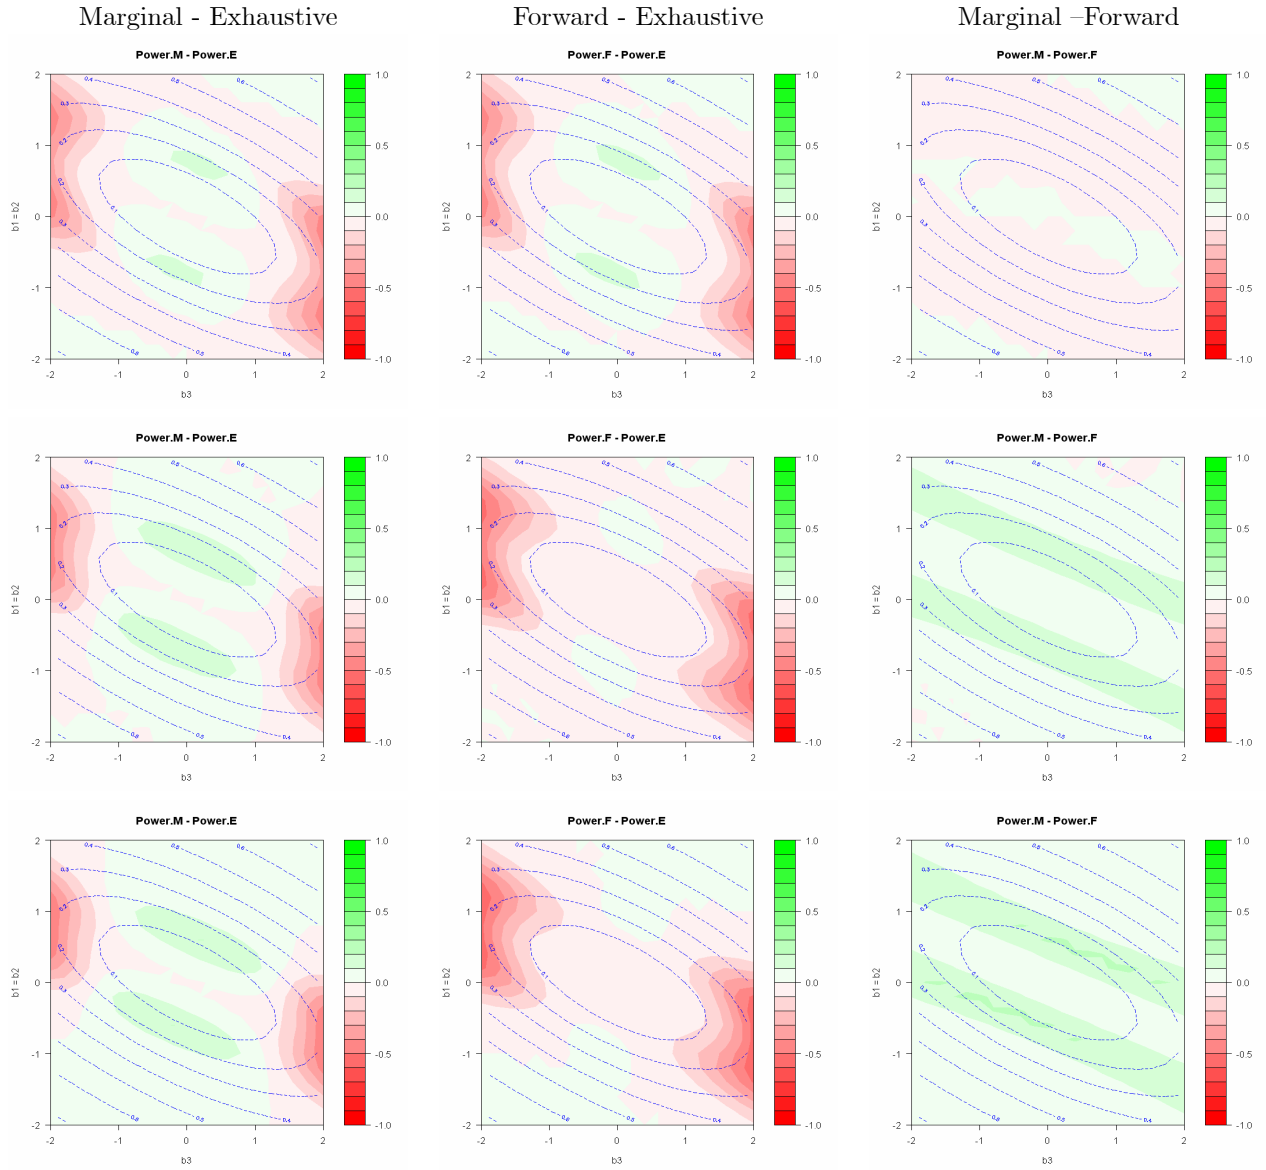

## 4 Formulas for distribution parameters of test statistics

The following formulas of distribution parameters are estimated based on genetic setup described in article equation (1).

### 4.1 Parameters for $(T_{12}, T_1, T_2)$

$$E(T_1) \rightarrow \sqrt{nh_1}(\bar{\mathbf{Z}}) = \frac{\sqrt{n} \cdot (\sqrt{B} \cdot \sqrt{n} \cdot p_1 \cdot q_1 \cdot (b_1 + b_3 \cdot (p_2 - q_2)))}{\sqrt{p_1 \cdot q_1 \cdot (2 \cdot p_2 \cdot ((b_2 + b_3 \cdot p_1)^2 - 2 \cdot b_2 \cdot b_3 \cdot q_1 + b_3^2 \cdot q_1^2) \cdot q_2 + \text{sigm}^2)}}$$

$$\begin{aligned} Var(T_1) &= \tau_1^2 \rightarrow [\nabla h_1(\boldsymbol{\theta})]' \Sigma [\nabla h_2(\boldsymbol{\theta})] = \\ &(-6 \cdot b_3^6 \cdot p_1^4 \cdot p_2^4 \cdot q_1^2 + 8 \cdot b_3^6 \cdot p_1^4 \cdot p_2^6 \cdot q_1^2 - 2 \cdot b_3^6 \cdot p_1^6 \cdot p_2^6 \cdot q_1^2 - \\ &4 \cdot b_3^6 \cdot p_1^5 \cdot p_2^6 \cdot q_1^3 - 6 \cdot b_3^6 \cdot p_1^2 \cdot p_2^4 \cdot q_1^4 + 8 \cdot b_3^6 \cdot p_1^2 \cdot p_2^6 \cdot q_1^4 - \\ &4 \cdot b_3^6 \cdot p_1^4 \cdot p_2^6 \cdot q_1^4 - 4 \cdot b_3^6 \cdot p_1^3 \cdot p_2^6 \cdot q_1^5 - 2 \cdot b_3^6 \cdot p_1^2 \cdot p_2^6 \cdot q_1^6 + \\ &12 \cdot b_3^6 \cdot p_1^4 \cdot p_2^3 \cdot q_1^2 \cdot q_2 + 4 \cdot b_3^6 \cdot p_1^6 \cdot p_2^5 \cdot q_1^2 \cdot q_2 + \\ &8 \cdot b_3^6 \cdot p_1^5 \cdot p_2^5 \cdot q_1^3 \cdot q_2 + 12 \cdot b_3^6 \cdot p_1^2 \cdot p_2^3 \cdot q_1^4 \cdot q_2 + \\ &8 \cdot b_3^6 \cdot p_1^4 \cdot p_2^5 \cdot q_1^4 \cdot q_2 + 8 \cdot b_3^6 \cdot p_1^3 \cdot p_2^5 \cdot q_1^5 \cdot q_2 + \\ &4 \cdot b_3^6 \cdot p_1^2 \cdot p_2^5 \cdot q_1^6 \cdot q_2 - 8 \cdot b_3^6 \cdot p_1^6 \cdot p_2^4 \cdot q_2^2 + 8 \cdot b_3^6 \cdot p_1^8 \cdot p_2^4 \cdot q_2^2 + \\ &32 \cdot b_3^6 \cdot p_1^5 \cdot p_2^4 \cdot q_1 \cdot q_2^2 - 12 \cdot b_3^6 \cdot p_1^7 \cdot p_2^4 \cdot q_1 \cdot q_2^2 - \\ &12 \cdot b_3^6 \cdot p_1^4 \cdot p_2^2 \cdot q_1^2 \cdot q_2^2 - 32 \cdot b_3^6 \cdot p_1^4 \cdot p_2^4 \cdot q_1^2 \cdot q_2^2 + \\ &10 \cdot b_3^6 \cdot p_1^6 \cdot p_2^4 \cdot q_1^2 \cdot q_2^2 + 64 \cdot b_3^6 \cdot p_1^3 \cdot p_2^4 \cdot q_1^3 \cdot q_2^2 - \\ &32 \cdot b_3^6 \cdot p_1^5 \cdot p_2^4 \cdot q_1^3 \cdot q_2^2 - 12 \cdot b_3^6 \cdot p_1^2 \cdot p_2^2 \cdot q_1^4 \cdot q_2^2 - \\ &32 \cdot b_3^6 \cdot p_1^2 \cdot p_2^4 \cdot q_1^4 \cdot q_2^2 + 4 \cdot b_3^6 \cdot p_1^4 \cdot p_2^4 \cdot q_1^4 \cdot q_2^2 + \\ &32 \cdot b_3^6 \cdot p_1 \cdot p_2^4 \cdot q_1^5 \cdot q_2^2 - 32 \cdot b_3^6 \cdot p_1^3 \cdot p_2^4 \cdot q_1^5 \cdot q_2^2 - \\ &8 \cdot b_3^6 \cdot p_2^4 \cdot q_1^6 \cdot q_2^2 + 10 \cdot b_3^6 \cdot p_1^2 \cdot p_2^4 \cdot q_1^6 \cdot q_2^2 - \\ &12 \cdot b_3^6 \cdot p_1 \cdot p_2^4 \cdot q_1^7 \cdot q_2^2 + 8 \cdot b_3^6 \cdot p_2^4 \cdot q_1^8 \cdot q_2^2 + \\ &32 \cdot b_2^6 \cdot p_1 \cdot p_2^3 \cdot q_1 \cdot q_2^3 - 8 \cdot b_3^6 \cdot p_1^7 \cdot p_2^3 \cdot q_1 \cdot q_2^3 + \\ &12 \cdot b_3^6 \cdot p_1^4 \cdot p_2^2 \cdot q_1^2 \cdot q_2^3 + 40 \cdot b_3^6 \cdot p_1^6 \cdot p_2^3 \cdot q_1^2 \cdot q_2^3 - \\ &40 \cdot b_3^6 \cdot p_1^5 \cdot p_2^2 \cdot q_1^3 \cdot q_2^3 + 12 \cdot b_3^6 \cdot p_1^2 \cdot p_2^2 \cdot q_1^4 \cdot q_2^3 + \\ &80 \cdot b_3^6 \cdot p_1^4 \cdot p_2^2 \cdot q_1^4 \cdot q_2^3 - 40 \cdot b_3^6 \cdot p_1^3 \cdot p_2^2 \cdot q_1^5 \cdot q_2^3 + \\ &40 \cdot b_3^6 \cdot p_1^2 \cdot p_2^2 \cdot q_1^6 \cdot q_2^3 - 8 \cdot b_3^6 \cdot p_1 \cdot p_2^2 \cdot q_1^7 \cdot q_2^3 - \\ &8 \cdot b_3^6 \cdot p_1^6 \cdot p_2^2 \cdot q_2^4 + 8 \cdot b_3^6 \cdot p_1^8 \cdot p_2^2 \cdot q_2^4 + 32 \cdot b_3^6 \cdot p_1^5 \cdot p_2^2 \cdot q_1 \cdot q_2^4 - \\ &12 \cdot b_3^6 \cdot p_1^7 \cdot p_2^2 \cdot q_1 \cdot q_2^4 - 6 \cdot b_3^6 \cdot p_1^4 \cdot q_1^2 \cdot q_2^4 - \\ &32 \cdot b_3^6 \cdot p_1^4 \cdot p_2^2 \cdot q_1^2 \cdot q_2^4 + 10 \cdot b_3^6 \cdot p_1^6 \cdot p_2^2 \cdot q_1^2 \cdot q_2^4 + \\ &64 \cdot b_3^6 \cdot p_1^3 \cdot p_2^2 \cdot q_1^3 \cdot q_2^4 - 32 \cdot b_3^6 \cdot p_1^5 \cdot p_2^2 \cdot q_1^3 \cdot q_2^4 - \\ &6 \cdot b_3^6 \cdot p_1^2 \cdot q_1^4 \cdot q_2^4 - 32 \cdot b_3^6 \cdot p_1^2 \cdot p_2^2 \cdot q_1^4 \cdot q_2^4 + \\ &4 \cdot b_3^6 \cdot p_1^4 \cdot p_2^2 \cdot q_1^4 \cdot q_2^4 + 32 \cdot b_3^6 \cdot p_1 \cdot p_2^2 \cdot q_1^5 \cdot q_2^4 - \\ &32 \cdot b_3^6 \cdot p_1^3 \cdot p_2^2 \cdot q_1^5 \cdot q_2^4 - 8 \cdot b_3^6 \cdot p_2^2 \cdot q_1^6 \cdot q_2^4 + \\ &10 \cdot b_3^6 \cdot p_1^2 \cdot p_2^2 \cdot q_1^6 \cdot q_2^4 - 12 \cdot b_3^6 \cdot p_1 \cdot p_2^2 \cdot q_1^7 \cdot q_2^4 + \\ &8 \cdot b_3^6 \cdot p_2^2 \cdot q_1^8 \cdot q_2^4 + 4 \cdot b_3^6 \cdot p_1^6 \cdot p_2 \cdot q_1^2 \cdot q_2^5 + \\ &8 \cdot b_3^6 \cdot p_1^5 \cdot p_2 \cdot q_1^3 \cdot q_2^5 + 8 \cdot b_3^6 \cdot p_1^4 \cdot p_2 \cdot q_1^4 \cdot q_2^5 + \\ &8 \cdot b_3^6 \cdot p_1^3 \cdot p_2 \cdot q_1^5 \cdot q_2^5 + 4 \cdot b_3^6 \cdot p_1^2 \cdot p_2 \cdot q_1^6 \cdot q_2^5 + \\ &8 \cdot b_3^6 \cdot p_1^4 \cdot q_1^2 \cdot q_2^6 - 2 \cdot b_3^6 \cdot p_1^6 \cdot q_1^2 \cdot q_2^6 - 4 \cdot b_3^6 \cdot p_1^5 \cdot q_1^3 \cdot q_2^6 + \\ &8 \cdot b_3^6 \cdot p_1^2 \cdot q_1^4 \cdot q_2^6 - 4 \cdot b_3^6 \cdot p_1^4 \cdot q_1^4 \cdot q_2^6 - 4 \cdot b_3^6 \cdot p_1^3 \cdot q_1^5 \cdot q_2^6 - \\ &2 \cdot b_3^6 \cdot p_1^2 \cdot q_1^6 \cdot q_2^6 - 16 \cdot b_2^5 \cdot b_3 \cdot p_2^2 \cdot (p_1 - q_1) \cdot q_2^2 \cdot \\ &(p_2^2 \cdot (-1 + p_1 + q_1) \cdot (1 + p_1 + q_1) - 8 \cdot p_1 \cdot p_2 \cdot q_1 \cdot q_2 + \\ &(-1 + p_1 + q_1) \cdot (1 + p_1 + q_1) \cdot q_2^2) + \\ &4 \cdot b_3^4 \cdot (p_1^5 \cdot p_2 \cdot q_1 \cdot q_2^2 \cdot (-3 \cdot p_2^2 + 2 \cdot p_2 \cdot q_2 - 3 \cdot q_2^2) + \\ &2 \cdot p_1^6 \cdot p_2 \cdot q_2 \cdot (p_2^2 + q_2^2) + 2 \cdot p_2 \cdot q_1^4 \cdot (-1 + q_1^2) \cdot q_2 \cdot (p_2^2 + q_2^2) + \\ &p_1 \cdot p_2 \cdot q_1^3 \cdot q_2 \cdot (p_2^2 \cdot (8 - 3 \cdot q_1^2) + 2 \cdot p_2 \cdot q_1^2 \cdot q_2 + (8 - 3 \cdot q_1^2) \cdot q_2^2) + \\ &2 \cdot p_1^3 \cdot q_1 \cdot (-2 \cdot p_2^4 \cdot q_1^2 + p_2^2 \cdot (4 + 5 \cdot q_1^2)) \cdot q_2 - 10 \cdot p_2^2 \cdot q_1^2 \cdot q_2^2 + \\ &p_2 \cdot (4 + 5 \cdot q_1^2) \cdot q_2^3 - 2 \cdot q_1^2 \cdot q_2^4) - \\ &2 \cdot p_1^4 \cdot (p_2^4 \cdot q_1^2 + p_2 \cdot (1 - 4 \cdot q_1^2)) \cdot q_2^3 + q_1^2 \cdot q_2^4 + \\ &p_2^3 \cdot (q_2 - 4 \cdot q_1^2 \cdot q_2) - 2 \cdot p_1^2 \cdot q_1^2 \cdot (p_2^4 \cdot (-2 + q_1^2) + \\ &p_2^3 \cdot (6 - 4 \cdot q_1^2)) \cdot q_2 + q_2^2 + (-2 + q_1^2) \cdot q_2^4 + p_2^2 \cdot (1 - 4 \cdot q_2^2) - \end{aligned}$$

$$\begin{aligned}
& 2^*p2^*(q2 + (-3 + 2^*q1^2)*q2^3)))*\text{sigm}^2 + \\
& b3^2^*(p2^2^*(2^*p1^4 - 3^*p1^3*q1 + 2^*q1^2*(-1 + q1^2) - 2^*p1^2*(1 + 4^*q1^2) + \\
& p1^*(8^*q1 - 3^*q1^3)) + 2^*p1^*p2^*q1^*(7^*p1^2 + 12^*p1^*q1 + 7^*q1^2)*q2 + \\
& (2^*p1^4 - 3^*p1^3*q1 + 2^*q1^2*(-1 + q1^2) - 2^*p1^2*(1 + 4^*q1^2) + \\
& p1^*(8^*q1 - 3^*q1^3))*q2^2)*\text{sigm}^4 + 4^*p1^*q1*\text{sigm}^6 + \\
& 4^*b2^4^*p2^*q2^*(b3^2^*(-14^*p1^4^*p2^*q2^*(p2^2 + q2^2) - \\
& 14^*p2^*q1^2*(-1 + q1^2)*q2^*(p2^2 + q2^2) + \\
& p1^2^*(p2^4^*q1^2 - 78^*p2^2^*q1^2^*q2^2 + 14^*p2^*(1 + 3^*q1^2)*q2^3 + \\
& q1^2^*q2^4 + 14^*p2^3^*(q2 + 3^*q1^2^*q2)) + \\
& p1^*(4^*p2^4^*q1^3 + 8^*p2^*q1^3^*q2 - 3^*p2^3^*q1^*(8 + q1^2)*q2 - \\
& 3^*p2^*q1^*(8 + q1^2)*q2^3 + 4^*q1^3^*q2^2*(-1 + q2^2) + \\
& 2^*p2^2^*q1^3^*(-2 + 19^*q2^2)) + p1^3^*q1^*(4^*p2^4 - 3^*p2^3^*q2 + \\
& 4^*q2^2*(-1 + q2^2) + p2^2^*(-4 + 38^*q2^2) + p2^*(8^*q2 - 3^*q2^3))) + \\
& 12^*p1^*p2^*q1^*q2^*\text{sigm}^2) - 8^*b2^3^*b3^*p2^*(p1 - q1)*q2^* \\
& (b3^2^*(p1^*p2^2^*q1^*(3 + p1^2^*(2 + p2^2) + 4^*p1^*p2^2^*q1 + 2^*q1^2 + \\
& p2^2^*(-6 + q1^2)) + 2^*p2^*(4^*p1^4^*p2^2 + p1^3^*(-2 + p2^2)*q1 + \\
& 4^*p2^2^*q1^2*(-1 + q1^2) - 2^*p1^2^*p2^2^*(2 + 11^*q1^2) + \\
& p1^*q1^*(-3 - 2^*q1^2 + p2^2^*(6 + q1^2))) *q2 + \\
& p1^*q1^*(3 + 2^*p1^2^*(1 + 5^*p2^2) + 48^*p1^*p2^2^*q1 + 2^*q1^2 + \\
& 2^*p2^2^*(-6 + 5^*q1^2))*q2^2 + 2^*p2^*(4^*p1^4 + p1^3^*q1 + \\
& 4^*q1^2*(-1 + q1^2) + p1^*q1^*(6 + q1^2) - 2^*p1^2^*(2 + 11^*q1^2))*q2^3 + \\
& p1^*q1^*(-6 + p1^2 + 4^*p1^*q1 + q1^2)*q2^4) + \\
& 2^*(p2^2^*(-1 + p1 + q1)*(1 + p1 + q1) - 8^*p1^*p2^*q1^*q2 + \\
& (-1 + p1 + q1)*(1 + p1 + q1)*q2^2)*\text{sigm}^2) - \\
& 4^*b2^2^*(2^*b3^4^*(2^*p1^6^*p2^2^*q2^2^*(p2^2 + q2^2) + 2^*p2^2^*q1^4^*(-1 + q1^2)* \\
& q2^2^*(p2^2 + q2^2) + p1^5^*p2^*q1^*q2^*(8^*p2^4 - 7^*p2^3^*q2 - 2^*q2^2 + \\
& 8^*q2^4 + p2^2^*(-2 + 34^*q2^2) + p2^*(4^*q2 - 7^*q2^3)) - \\
& p1^4^*(3^*p2^6^*q1^2 + p2^5^*q1^2^*q2 - 2^*p2^3^*q1^2^*q2^2*(-3 + q2^2) + \\
& 3^*q1^2^*q2^4^*(-1 + q2^2) + p2^*q1^2^*q2^3^*(6 + q2^2) + \\
& p2^4^*(-3^*q1^2 + (2 + 39^*q1^2)*q2^2) + \\
& p2^2^*(-6^*q1^2^*q2^2 + (2 + 39^*q1^2)*q2^4)) + \\
& p1^2^*q1^2^*(-3^*p2^6^*q1^2 - p2^5^*(-20 + q1^2)*q2 - \\
& 3^*q1^2^*q2^4^*(-1 + q2^2) + 3^*p2^4^*(q1^2 - (4 + 13^*q1^2)*q2^2) + \\
& p2^2^*q2^2^*(20 - 12^*q2^2 + q1^2^*(6 - 39^*q2^2)) + \\
& 2^*p2^3^*q2^*(-5 + 20^*q2^2 + q1^2^*(-3 + q2^2)) - \\
& p2^*q2^3^*(10 - 20^*q2^2 + q1^2^*(6 + q2^2))) + \\
& 2^*p1^3^*p2^*q1^*q2^*(-2^*p2^4^*(3 + q1^2) + p2^3^*(4 + 29^*q1^2)*q2 + \\
& q2^2^*(3 - 2^*q1^2 - 2^*(3 + q1^2)*q2^2) - \\
& p2^2^*(-3 + 2^*q1^2 + 6^*(2 + 3^*q1^2)*q2^2) + \\
& p2^*q2^2^*(-6 + 4^*q2^2 + q1^2^*(4 + 29^*q2^2))) + \\
& p1^*p2^*q1^3^*q2^*(4^*p2^4^*(-3 + 2^*q1^2) + p2^3^*(8 - 7^*q1^2)*q2 - \\
& 2^*(-3 + q1^2)*q2^2 + 4^*(-3 + 2^*q1^2)*q2^4 + \\
& p2^*q2^2^*(-12 + 8^*q2^2 + q1^2^*(4 - 7^*q2^2)) + \\
& p2^2^*(6 - 24^*q2^2 + q1^2^*(-2 + 34^*q2^2))) + \\
& b3^2^*(6^*p1^4^*p2^*q2^*(p2^2 + q2^2) + 6^*p2^*q1^2^*(-1 + q1^2)*q2^* \\
& (p2^2 + q2^2) - 2^*p1^2^*p2^*q2^*(p2^2^*(3 + 10^*q1^2) - 16^*p2^*q1^2^*q2 + \\
& (3 + 10^*q1^2)*q2^2) + p1^*(-2^*p2^4^*q1^3 - 4^*p2^*q1^3^*q2 + \\
& p2^3^*q1^*(8 + 3^*q1^2)*q2 + p2^*q1^*(8 + 3^*q1^2)*q2^3 + \\
& 2^*p2^2^*q1^3^*(1 - 13^*q2^2) - 2^*q1^3^*q2^2^*(-1 + q2^2)) + \\
& p1^3^*q1^*(-2^*p2^4 + 3^*p2^3^*q2 + 2^*q2^2 - 2^*q2^4 + p2^2^*(2 - 26^*q2^2) + \\
& p2^*q2^2^*(-4 + 3^*q2^2))*\text{sigm}^2 - 6^*p1^*p2^*q1^*q2^*\text{sigm}^4) + \\
& 4^*b2^3^*b3^*(p1 - q1)^*(2^*b3^4^*(2^*p1^6^*p2^2^*q2^2^*(p2^2 + q2^2) + \\
& 2^*p2^2^*q1^4^*(-1 + q1^2)*q2^2^*(p2^2 + q2^2) - p1^4^*(p2^2 + q2^2)* \\
& (p2^4^*q1^2 - 2^*p2^2^*(-1 + 4^*q1^2)*q2^2 + q1^2^*q2^4) + \\
& p1^2^*q1^2^*(-(p2^4^*(3 + p2^2^*(-4 + q1^2))) - 2^*p2^3^*(-5 + 4^*p2^2)*q2 + \\
& p2^2^*(-14 + p2^2^*(8 + 7^*q1^2))*q2^2 - 2^*p2^*(-5 + 8^*p2^2)*q2^3 +
\end{aligned}$$

$$\begin{aligned}
& (-3 + p^2 \cdot 2^*(8 + 7 \cdot q^1 \cdot 2)) \cdot q^2 \cdot 4 - 8 \cdot p^2 \cdot q^2 \cdot 5 - (-4 + q^1 \cdot 2) \cdot q^2 \cdot 6 + \\
& p^1 \cdot 5 \cdot p^2 \cdot q^1 \cdot q^2 \cdot (-5 \cdot p^2 \cdot 4 + 2 \cdot p^2 \cdot 3 \cdot q^2 + 2 \cdot q^2 \cdot 2 - 5 \cdot q^2 \cdot 4 + \\
& p^2 \cdot 2 \cdot (2 - 18 \cdot q^2 \cdot 2) + 2 \cdot p^2 \cdot q^2 \cdot (-2 + q^2 \cdot 2)) + \\
& p^1 \cdot p^2 \cdot q^1 \cdot 3 \cdot q^2 \cdot (p^2 \cdot 4 \cdot (6 - 5 \cdot q^1 \cdot 2) + 2 \cdot p^2 \cdot 3 \cdot (2 + q^1 \cdot 2) \cdot q^2 + \\
& 2 \cdot p^2 \cdot q^2 \cdot (3 - 2 \cdot q^1 \cdot 2 + (2 + q^1 \cdot 2) \cdot q^2 \cdot 2) + \\
& p^2 \cdot 2 \cdot (-3 + 2 \cdot q^1 \cdot 2 - 6 \cdot (-2 + 3 \cdot q^1 \cdot 2) \cdot q^2 \cdot 2) + \\
& q^2 \cdot 2 \cdot (-3 + 6 \cdot q^2 \cdot 2 + q^1 \cdot 2 \cdot (2 - 5 \cdot q^2 \cdot 2))) + \\
& p^1 \cdot 3 \cdot q^1 \cdot (-2 \cdot p^2 \cdot 6 \cdot q^1 \cdot 2 + 2 \cdot p^2 \cdot 5 \cdot (3 + q^1 \cdot 2) \cdot q^2 - 2 \cdot p^2 \cdot 4 \cdot (-2 + 13 \cdot q^1 \cdot 2) \cdot \\
& q^2 \cdot 2 - 2 \cdot q^1 \cdot 2 \cdot q^2 \cdot 6 + p^2 \cdot q^2 \cdot 3 \cdot (-3 + 4 \cdot q^1 \cdot 2 + 2 \cdot (3 + q^1 \cdot 2) \cdot q^2 \cdot 2) + \\
& p^2 \cdot 3 \cdot q^2 \cdot (-3 + 4 \cdot q^1 \cdot 2 + 4 \cdot (3 + q^1 \cdot 2) \cdot q^2 \cdot 2) + \\
& 2 \cdot p^2 \cdot 2 \cdot q^2 \cdot 2 \cdot (3 + 2 \cdot q^2 \cdot 2 - q^1 \cdot 2 \cdot (4 + 13 \cdot q^2 \cdot 2))) - \\
& b^3 \cdot 2 \cdot p^1 \cdot q^1 \cdot (p^2 \cdot 4 \cdot (-6 + 5 \cdot p^1 \cdot 2 + 6 \cdot p^1 \cdot q^1 + 5 \cdot q^1 \cdot 2) + \\
& 2 \cdot p^2 \cdot 3 \cdot (-2 + p^1 \cdot 2 - 8 \cdot p^1 \cdot q^1 + q^1 \cdot 2) \cdot q^2 + \\
& 2 \cdot p^2 \cdot q^2 \cdot (-3 + 2 \cdot p^1 \cdot 2 + 2 \cdot q^1 \cdot 2 + (-2 + p^1 \cdot 2 - 8 \cdot p^1 \cdot q^1 + q^1 \cdot 2) \cdot q^2 \cdot 2) + \\
& p^2 \cdot 2 \cdot (3 - 2 \cdot p^1 \cdot 2 - 2 \cdot q^1 \cdot 2 + 2 \cdot (-6 + p^1 \cdot 2 + 10 \cdot p^1 \cdot q^1 + q^1 \cdot 2) \cdot q^2 \cdot 2) + \\
& q^2 \cdot 2 \cdot (3 - 2 \cdot p^1 \cdot 2 - 2 \cdot q^1 \cdot 2 + (-6 + 5 \cdot p^1 \cdot 2 + 6 \cdot p^1 \cdot q^1 + 5 \cdot q^1 \cdot 2) \cdot q^2 \cdot 2)) \cdot \\
& \text{sigm}^2 - (p^2 \cdot 2 \cdot (-1 + p^1 + q^1) \cdot (1 + p^1 + q^1) - 8 \cdot p^1 \cdot p^2 \cdot q^1 \cdot q^2 + \\
& (-1 + p^1 + q^1) \cdot (1 + p^1 + q^1) \cdot q^2 \cdot 2) \cdot \text{sigm}^4 + \\
& b^1 \cdot 2 \cdot p^1 \cdot q^1 \cdot (4 \cdot b^2 \cdot 4 \cdot p^2 \cdot q^2 \cdot (p^2 \cdot q^1 + p^1 \cdot q^2) \cdot (p^1 \cdot p^2 + q^1 \cdot q^2) + \\
& 2 \cdot b^3 \cdot 4 \cdot (p^1 \cdot 2 + q^1 \cdot 2) \cdot \\
& (-p^1 \cdot p^2 \cdot 2 \cdot q^1 \cdot (3 + p^2 \cdot 2 \cdot (-2 + p^1 + q^1) \cdot (2 + p^1 + q^1))) + \\
& 8 \cdot p^1 \cdot p^2 \cdot q^1 \cdot (1 + p^2 \cdot 2 \cdot (-1 + p^1 + q^1) \cdot (1 + p^1 + q^1)) \cdot q^2 + \\
& (2 \cdot p^1 \cdot 4 \cdot p^2 \cdot 2 - 10 \cdot p^1 \cdot 3 \cdot p^2 \cdot 2 \cdot q^1 - 56 \cdot p^1 \cdot 2 \cdot p^2 \cdot 2 \cdot q^1 \cdot 2 + 2 \cdot p^2 \cdot 2 \cdot q^1 \cdot 4 + \\
& p^1 \cdot q^1 \cdot (-3 + 2 \cdot p^2 \cdot 2 \cdot (4 - 5 \cdot q^1 \cdot 2))) \cdot q^2 \cdot 2 + 8 \cdot p^1 \cdot p^2 \cdot q^1 \cdot (-1 + p^1 + q^1) \cdot \\
& (1 + p^1 + q^1) \cdot q^2 \cdot 3 - p^1 \cdot q^1 \cdot (-2 + p^1 + q^1) \cdot (2 + p^1 + q^1) \cdot q^2 \cdot 4) + \\
& 16 \cdot b^2 \cdot 3 \cdot b^3 \cdot p^2 \cdot (p^1 - q^1) \cdot q^2 \cdot (p^1 \cdot 2 \cdot p^2 \cdot q^2 + p^2 \cdot q^1 \cdot 2 \cdot q^2 + \\
& p^1 \cdot q^1 \cdot (p^2 + q^2) \cdot 2) + 4 \cdot b^3 \cdot 2 \cdot p^2 \cdot (p^1 \cdot 4 + 6 \cdot p^1 \cdot 3 \cdot q^1 - 6 \cdot p^1 \cdot 2 \cdot q^1 \cdot 2 + \\
& 6 \cdot p^1 \cdot q^1 \cdot 3 + q^1 \cdot 4) \cdot q^2 \cdot \text{sigm}^2 + (p^1 \cdot 2 + 4 \cdot p^1 \cdot q^1 + q^1 \cdot 2) \cdot \text{sigm}^4 + \\
& 4 \cdot b^2 \cdot 2 \cdot (2 \cdot b^3 \cdot 2 \cdot (3 \cdot p^1 \cdot p^2 \cdot 2 \cdot (-1 + p^2 \cdot 2) \cdot q^1 \cdot (p^1 \cdot 2 + q^1 \cdot 2) + \\
& p^1 \cdot p^2 \cdot (8 + p^2 \cdot 2) \cdot q^1 \cdot (p^1 \cdot 2 + q^1 \cdot 2) \cdot q^2 + \\
& (3 \cdot p^1 \cdot 4 \cdot p^2 \cdot 2 - p^1 \cdot 3 \cdot (3 + 4 \cdot p^2 \cdot 2) \cdot q^1 - 10 \cdot p^1 \cdot 2 \cdot p^2 \cdot 2 \cdot q^1 \cdot 2 - \\
& p^1 \cdot (3 + 4 \cdot p^2 \cdot 2) \cdot q^1 \cdot 3 + 3 \cdot p^2 \cdot 2 \cdot q^1 \cdot 4) \cdot q^2 \cdot 2 + p^1 \cdot p^2 \cdot q^1 \cdot (p^1 \cdot 2 + q^1 \cdot 2) \cdot \\
& q^2 \cdot 3 + 3 \cdot p^1 \cdot q^1 \cdot (p^1 \cdot 2 + q^1 \cdot 2) \cdot q^2 \cdot 4) + p^2 \cdot (p^1 \cdot 2 + 4 \cdot p^1 \cdot q^1 + q^1 \cdot 2) \cdot q^2 \cdot \\
& \text{sigm}^2) + 8 \cdot b^2 \cdot b^3 \cdot (p^1 - q^1) \cdot \\
& (b^3 \cdot 2 \cdot (-p^1 \cdot p^2 \cdot 2 \cdot q^1 \cdot (3 + p^2 \cdot 2 \cdot (-2 + p^1 + q^1) \cdot (2 + p^1 + q^1))) + \\
& 8 \cdot p^1 \cdot p^2 \cdot q^1 \cdot (1 + p^2 \cdot 2 \cdot (-1 + p^1 + q^1) \cdot (1 + p^1 + q^1)) \cdot q^2 + \\
& (2 \cdot p^1 \cdot 4 \cdot p^2 \cdot 2 - 10 \cdot p^1 \cdot 3 \cdot p^2 \cdot 2 \cdot q^1 - 40 \cdot p^1 \cdot 2 \cdot p^2 \cdot 2 \cdot q^1 \cdot 2 + 2 \cdot p^2 \cdot 2 \cdot q^1 \cdot 4 + \\
& p^1 \cdot q^1 \cdot (-3 + 2 \cdot p^2 \cdot 2 \cdot (4 - 5 \cdot q^1 \cdot 2))) \cdot q^2 \cdot 2 + 8 \cdot p^1 \cdot p^2 \cdot q^1 \cdot (-1 + p^1 + q^1) \cdot \\
& (1 + p^1 + q^1) \cdot q^2 \cdot 3 - p^1 \cdot q^1 \cdot (-2 + p^1 + q^1) \cdot (2 + p^1 + q^1) \cdot q^2 \cdot 4) + \\
& p^2 \cdot (p^1 \cdot 2 + 6 \cdot p^1 \cdot q^1 + q^1 \cdot 2) \cdot q^2 \cdot \text{sigm}^2) + \\
& 2 \cdot b^1 \cdot b^3 \cdot p^1 \cdot q^1 \cdot (p^2 - q^2) \cdot (2 \cdot b^3 \cdot 4 \cdot (p^1 \cdot 2 + q^1 \cdot 2) \cdot \\
& (-p^1 \cdot p^2 \cdot 2 \cdot q^1 \cdot (3 + p^2 \cdot 2 \cdot (-2 + p^1 + q^1) \cdot (2 + p^1 + q^1))) + \\
& 4 \cdot p^1 \cdot p^2 \cdot q^1 \cdot (1 + p^2 \cdot 2 \cdot (p^1 + q^1) \cdot 2) \cdot q^2 + \\
& (2 \cdot p^1 \cdot 4 \cdot p^2 \cdot 2 + 6 \cdot p^1 \cdot 3 \cdot p^2 \cdot 2 \cdot q^1 - 24 \cdot p^1 \cdot 2 \cdot p^2 \cdot 2 \cdot q^1 \cdot 2 + 2 \cdot p^2 \cdot 2 \cdot q^1 \cdot 4 + \\
& p^1 \cdot q^1 \cdot (-3 + p^2 \cdot 2 \cdot (8 + 6 \cdot q^1 \cdot 2))) \cdot q^2 \cdot 2 + 4 \cdot p^1 \cdot p^2 \cdot q^1 \cdot (p^1 + q^1) \cdot 2 \cdot q^2 \cdot 3 - \\
& p^1 \cdot q^1 \cdot (-2 + p^1 + q^1) \cdot (2 + p^1 + q^1) \cdot q^2 \cdot 4) - 4 \cdot b^2 \cdot 3 \cdot b^3 \cdot p^2 \cdot (p^1 - q^1) \cdot q^2 \cdot \\
& (3 - 6 \cdot p^2 \cdot 2 - 6 \cdot q^2 \cdot 2 + 2 \cdot p^1 \cdot q^1 \cdot (p^2 \cdot 2 - 28 \cdot p^2 \cdot q^2 + q^2 \cdot 2) + \\
& p^1 \cdot 2 \cdot (2 + p^2 \cdot 2 - 14 \cdot p^2 \cdot q^2 + q^2 \cdot 2) + q^1 \cdot 2 \cdot (2 + p^2 \cdot 2 - 14 \cdot p^2 \cdot q^2 + \\
& q^2 \cdot 2)) + 4 \cdot b^2 \cdot 4 \cdot p^2 \cdot q^2 \cdot (p^1 \cdot q^1 \cdot (p^2 \cdot 2 + 12 \cdot p^2 \cdot q^2 + q^2 \cdot 2) + \\
& p^1 \cdot 2 \cdot (-2 + (2 \cdot p^2 + q^2) \cdot (p^2 + 2 \cdot q^2)) + \\
& q^1 \cdot 2 \cdot (-2 + (2 \cdot p^2 + q^2) \cdot (p^2 + 2 \cdot q^2))) + \\
& 4 \cdot b^3 \cdot 2 \cdot (-p^1 \cdot q^1 \cdot (1 + p^2 \cdot 2 \cdot (-2 + (p^1 + q^1) \cdot 2))) + \\
& p^2 \cdot (p^1 \cdot 2 + q^1 \cdot 2) \cdot (p^1 \cdot 2 + 10 \cdot p^1 \cdot q^1 + q^1 \cdot 2) \cdot q^2 - p^1 \cdot q^1 \cdot (-2 + (p^1 + q^1) \cdot 2) \cdot \\
& q^2 \cdot 2) \cdot \text{sigm}^2 + (p^1 \cdot 2 + 4 \cdot p^1 \cdot q^1 + q^1 \cdot 2) \cdot \text{sigm}^4 - \\
& 4 \cdot b^2 \cdot 2 \cdot (2 \cdot b^3 \cdot 2 \cdot (p^1 \cdot 4 \cdot p^2 \cdot q^2 \cdot (-1 + 4 \cdot p^2 \cdot 2 - 7 \cdot p^2 \cdot q^2 + 4 \cdot q^2 \cdot 2) + \\
& p^1 \cdot 2 \cdot p^2 \cdot q^2 \cdot (3 - 2 \cdot q^1 \cdot 2 - 2 \cdot p^2 \cdot 2 \cdot (3 + q^1 \cdot 2) + 42 \cdot p^2 \cdot q^1 \cdot 2 \cdot q^2 -
\end{aligned}$$

$$\begin{aligned}
& 2^*(3 + q1^2)*q2^2) + p2*q1^2*q2^*(3 + p2^2*(-6 + 4*q1^2) - \\
& 7*p2*q1^2*q2 - 6*q2^2 + q1^2*(-1 + 4*q2^2)) - \\
& p1^3*q1*(3*p2^4 + 4*p2^3*q2 + 3*q2^2*(-1 + q2^2) + \\
& p2^2*(-3 + 26*q2^2) + 4*p2*(q2 + q2^3)) + \\
& p1*(-3*p2^4*q1^3 + 2*p2^3*q1*(5 - 2*q1^2)*q2 + \\
& p2^2*q1^3*(3 - 26*q2^2) - 3*q1^3*q2^2*(-1 + q2^2) - \\
& p2*q1*q2*(5 - 10*q2^2 + 4*q1^2*(1 + q2^2))) - \\
& ((-1 + p2^2)*(p1^2 + q1^2) + p2*(3*p1 + q1)*(p1 + 3*q1)*q2 + \\
& (p1^2 + q1^2)*q2^2)*sigm^2) - 2*b2*b3*(p1 - q1)* \\
& (2*b3^2*(2*p1*p2^2*q1*(3 + p2^2*(-2 + p1 + q1))*(2 + p1 + q1)) + \\
& p2*(p1^4*(-2 + 5*p2^2) - 6*p1^3*p2^2*q1 - \\
& 2*p1*q1*(6 + p2^2*(-4 + 3*q1^2)) + q1^2*(3 - 2*q1^2 + \\
& p2^2*(-6 + 5*q1^2)) - p1^2*(-3 + 4*q1^2 + 2*p2^2*(3 + 7*q1^2))) * \\
& q2 - 2*(3*p1^4*p2^2 + 10*p1^3*p2^2*q1 - 22*p1^2*p2^2*q1^2 + \\
& 3*p2^2*q1^4 + p1*q1*(-3 + 2*p2^2*(4 + 5*q1^2))) * q2^2 + \\
& p2*(5*p1^4 - 6*p1^3*q1 + q1^2*(-6 + 5*q1^2) - 2*p1^2*(3 + 7*q1^2) + \\
& p1*(8*q1 - 6*q1^3))*q2^3 + 2*p1*q1*(-2 + p1 + q1)*(2 + p1 + q1)* \\
& q2^4) + (3 - 6*p2^2 - 6*q2^2 + 6*p1*q1*(p2^2 - 8*p2*q2 + q2^2) + \\
& p1^2*(-2 + 5*p2^2 - 6*p2*q2 + 5*q2^2) + \\
& q1^2*(-2 + 5*p2^2 - 6*p2*q2 + 5*q2^2))*sigm^2))/ \\
& (4*p1*q1*(2*p2*((b2 + b3*p1)^2 - 2*b2*b3*q1 + b3^2*q1^2)*q2 + sigm^2)^3)
\end{aligned}$$

$$\begin{aligned}
Cov(T_1, T_2) = \tau_{12} \rightarrow [\nabla h_1(\boldsymbol{\theta})]' \Sigma [\nabla h_2(\boldsymbol{\theta})] = \\
& (p1*p2*q1*q2^2*(-2*b1^4*b3*p1^2*q1^2*(p2 - q2)* \\
& (b3*(p1 - q1)*(1 + p2^2*(-2 + p1^2 + 2*p1*q1 + q1^2) - \\
& 2*p2*(p1^2 + 4*p1*q1 + q1^2)*q2 + (-2 + p1^2 + 2*p1*q1 + q1^2)*q2^2) - \\
& 2*b2*(4*p1*p2*q1*q2 + p1^2*(-1 + p2^2 + 2*p2*q2 + q2^2) + \\
& q1^2*(-1 + p2^2 + 2*p2*q2 + q2^2))) - \\
& b1^3*p1*q1*(2*b2*b3^2*(p1^4*p2*q2^2*(4*p2^2 + 3*p2*q2 + 4*q2^2) + \\
& p2*q1^2*q2*(4*p2^2*(-1 + q1^2) + 3*p2*q1^2*q2 + 4*(-1 + q1^2)*q2^2) - \\
& 2*p1^2*p2*q2*(2*p2^2*(1 + 9*q1^2) - 27*p2*q1^2*q2 + \\
& 2*(1 + 9*q1^2)*q2^2) - p1^3*q1*(2*p2^4 + p2^3*q2 + p2*q2^3 + \\
& 2*p2^2*(-1 + q2^2) + 2*q2^2*(-1 + q2^2)) - \\
& p1*q1*(2*p2^4*q1^2 + p2^3*(-8 + q1^2)*q2 + p2*(-8 + q1^2)*q2^3 + \\
& 2*p2^2*q1^2*(-1 + q2^2) + 2*q1^2*q2^2*(-1 + q2^2))) + \\
& 2*b3^3*(p1 - q1)*(p1^4*p2*q2*(2*p2^2 + p2*q2 + 2*q2^2) + \\
& p2*q1^2*q2*(2*p2^2*(-1 + q1^2) + p2*q1^2*q2 + 2*(-1 + q1^2)*q2^2) + \\
& p1^3*q1*(3*p2^4 - 5*p2^3*q2 + 12*p2^2*q2^2 - 5*p2*q2^3 + 3*q2^4) + \\
& p1^2*(6*p2^4*q1^2 + 46*p2^2*q1^2*q2^2 - 2*p2*(1 + 14*q1^2)*q2^3 + \\
& 6*q1^2*q2^4 - 2*p2^3*(q2 + 14*q1^2*q2)) + \\
& p1*q1*(p2^4*(-4 + 3*q1^2) + p2^3*(8 - 5*q1^2)*q2 + q2^2 + \\
& p2*(8 - 5*q1^2)*q2^3 + (-4 + 3*q1^2)*q2^4 + \\
& p2^2*(1 + 4*(-2 + 3*q1^2)*q2^2))) + \\
& b2*p2*q2*(2*b2^2*(p1^2*p2*q2 + p2*q1^2*q2 + \\
& p1*q1*(p2^2 - 8*p2*q2 + q2^2)) + (p1^2 + q1^2)*sigm^2) + \\
& b3*(p1 - q1)*(2*b2^2*p2*q2*(p2^2*(-2 + 2*p1^2 + 7*p1*q1 + 2*q1^2) + \\
& p2*(3*p1^2 - 8*p1*q1 + 3*q1^2)*q2 + (-2 + 2*p1^2 + 7*p1*q1 + 2*q1^2)* \\
& q2^2) + (2*p2^2*(-1 + p1^2 + 2*p1*q1 + q1^2) + \\
& p2*(p1^2 + 12*p1*q1 + q1^2)*q2 + 2*(-1 + p1^2 + 2*p1*q1 + q1^2)* \\
& q2^2)*sigm^2) - b1^2*b3*p1*q1*(p2 - q2)* \\
& (2*b3^3*(p1 - q1)*(p1^4*p2*q2*(2 + 3*p2^2 + p2*q2 + 3*q2^2) + \\
& p1^3*q1*(3*p2^4 + 5*p2^3*q2 + 12*p2^2*q2^2 + 5*p2*q2^3 + 3*q2^4) + \\
& p2*q1^2*q2*(-1 + p2^2*(-4 + 3*q1^2) + p2*q1^2*q2 - 4*q2^2 + \\
& q1^2*(2 + 3*q2^2)) + p1*q1*(3*p2^4*q1^2 + p2^3*(4 + 5*q1^2)*q2 + \\
& 3*q2^2*(-1 + q1^2*q2^2) + 3*p2^2*(-1 + 4*q1^2*q2^2) + \\
& p2*q2*(10 + (4 + 5*q1^2)*q2^2)) + \\
& p1^2*(6*p2^4*q1^2 - 2*p2^3*(2 + 11*q1^2)*q2 + 30*p2^2*q1^2*q2^2 +
\end{aligned}$$

$$\begin{aligned}
& 6^*q1^2*q2^4 - p2^*(q2 - 4^*q1^2*q2 + (4 + 22^*q1^2)*q2^3))) + \\
& 2^*b2^b3^2*(p1^4*p2^2*q2^2*(6 + p2^2 + 7^*p2^2*q2 + q2^2) + \\
& p2^2*q1^2*q2^2*(-5 + p2^2*(-2 + q1^2) + 7^*p2^2*q1^2*q2 - 2^*q2^2 + \\
& q1^2*(6 + q2^2)) + p1^3*q1*(6^*p2^4 + 7^*p2^3*q2 + \\
& 6^*q2^2*(-1 + q2^2) + 6^*p2^2*(-1 + 3^*q2^2) + p2^2*q2^2*(12 + 7^*q2^2)) - \\
& p1^2*p2^2*q2^2*(5 + p2^2*(2 + 66^*q1^2) - 14^*p2^2*q1^2*q2 + 2^*q2^2 + \\
& 6^*q1^2*(-2 + 11^*q2^2)) + p1^2*q1*(6^*p2^4*q1^2 + p2^3*(8 + 7^*q1^2)*q2 + \\
& 6^*q1^2*q2^2*(-1 + q2^2) + 6^*p2^2*q1^2*(-1 + 3^*q2^2) + \\
& p2^2*q2^2*(8*(1 + q2^2) + q1^2*(12 + 7^*q2^2))) + \\
& b2^*p2^2*q2^2*(2^*b2^2*(p1^2*(-2 + 2^*p2^2 + 7^*p2^2*q2 + 2^*q2^2) + \\
& q1^2*(-2 + 2^*p2^2 + 7^*p2^2*q2 + 2^*q2^2) + \\
& p1^2*q1*(3^*p2^2 - 8^*p2^2*q2 + 3^*q2^2)) + (3^*p1^2 + 4^*p1^2*q1 + 3^*q1^2)* \\
& \text{sigm}^2) + b3^*(p1 - q1)*(2^*b2^2*p2^2*q2^2*(2^*p2^2 + 13^*p2^2*q1^2*q2 + \\
& p1^2*(2 + 13^*p2^2*q2) + 2^*(-2 + q1^2 + q2^2) + \\
& p1^2*q1*(13^*p2^2 + 24^*p2^2*q2 + 13^*q2^2)) + \\
& (-1 + 2^*q1^2 + p2^2*(-4 + 3^*q1^2) + p2^2*q1^2*q2 - 4^*q2^2 + \\
& 3^*q1^2*q2^2 + 10^*p1^2*q1*(p2^2 + 4^*p2^2*q2 + q2^2) + \\
& p1^2*(2 + 3^*p2^2 + p2^2*q2 + 3^*q2^2))*\text{sigm}^2)) + \\
& b1^*(-(b3^5*(p1 - q1)*(8^*p1^6*p2^2*q2^2*(p2^2 + q2^2) + \\
& 8^*p2^2*q1^4*(-1 + q1^2)*q2^2*(p2^2 + q2^2) + \\
& 2^*p1^4*(p2^6*q1^2 + 6^*p2^5*q1^2*q2 - p2^4*(4 + q1^2)*q2^2 + \\
& 20^*p2^3*q1^2*q2^3 - p2^2*(4 + q1^2)*q2^4 + 6^*p2^2*q1^2*q2^5 + \\
& q1^2*q2^6) - p1^5*p2^2*q1^2*q2^2*(p2^4 - 4^*p2^3*q2 + q2^2*(-8 + q2^2) - \\
& 4^*p2^2*q2*(-4 + q2^2) + 2^*p2^2*(-4 + 5^*q2^2)) + \\
& 2^*p1^2*q1^2*(p2^6*(4 + q1^2) + 2^*p2^5*(-4 + 3^*q1^2)*q2 - \\
& p2^4*(5 + (-4 + q1^2)*q2^2) - p2^2*q2^2*(34 + (-4 + q1^2)*q2^2) + \\
& q2^4*(-5 + (4 + q1^2)*q2^2) + 2^*p2^3*q2^2*(11 + 2^*(-4 + 5^*q1^2)* \\
& q2^2) + p2^2*(22^*q2^3 + (-8 + 6^*q1^2)*q2^5)) + \\
& p1^2*p2^2*q1^3*q2^2*(-(p2^4*q1^2) + 4^*p2^3*(4 + q1^2)*q2 + \\
& p2^2*(-7 + q1^2*(8 - 10^*q2^2)) - q2^2*(7 + q1^2*(-8 + q2^2)) + \\
& 4^*p2^2*q2*(q1^2*(-4 + q2^2) + 4^*(1 + q2^2))) + \\
& p1^3*q1^4*(4^*p2^6*q1^2 - 26^*p2^5*q1^2*q2 + 4^*p2^4*(4 + 13^*q1^2)*q2^2 + \\
& 4^*q1^2*q2^6 + p2^3*q2^2*(-7 + q1^2*(16 - 68^*q2^2)) + \\
& p2^2*q2^3*(-7 + q1^2*(16 - 26^*q2^2)) + 4^*p2^2*q2^2* \\
& (4^*(1 + q2^2) + q1^2*(-8 + 13^*q2^2)))) + \\
& b2^*b3^4*(-20^*p1^6*p2^2*q2^2*(p2^2 + q2^2) - 20^*p2^2*q1^4*(-1 + q1^2)* \\
& q2^2*(p2^2 + q2^2) + p1^5*p2^2*q1^2*q2^2*(7^*p2^4 + 4^*p2^3*q2 + \\
& 4^*p2^2*q2*(4 + q2^2) + q2^2*(-12 + 7^*q2^2) + 2^*p2^2*(-6 + 43^*q2^2)) - \\
& 4^*p1^4*(5^*p2^6*q1^2 - p2^5*q1^2*q2 - p2^2*q1^2*q2^3*(-14 + q2^2) + \\
& 5^*q1^2*q2^4*(-1 + q2^2) + 2^*p2^3*q1^2*q2^2*(7 + 13^*q2^2) + \\
& p2^2*(-5^*q2^4 + 2^*q1^2*q2^2*(-9 + 4^*q2^2)) + \\
& p2^4*(-5^*q2^2 + q1^2*(-5 + 8^*q2^2))) - 4^*p1^2*q1^2* \\
& (5^*p2^6*q1^2 - p2^5*(4 + q1^2)*q2 + 5^*q1^2*q2^4*(-1 + q2^2) + \\
& p2^2*q2^3*(8 - 4^*q2^2 - q1^2*(-14 + q2^2)) + 2^*p2^2*q2^2* \\
& (-8 - 9^*q2^2 + q1^2*(-9 + 4^*q2^2)) + \\
& p2^4*(-18^*q2^2 + q1^2*(-5 + 8^*q2^2)) + 2^*p2^3*q2^2* \\
& (4 - 4^*q2^2 + q1^2*(7 + 13^*q2^2))) + p1^2*p2^2*q1^3*q2^2* \\
& (p2^4*(-12 + 7^*q1^2) + 4^*p2^3*(-14 + q1^2)*q2 + \\
& q2^2*(17 - 12^*q2^2 + q1^2*(-12 + 7^*q2^2)) + \\
& 4^*p2^2*q2*(q1^2*(4 + q2^2) - 2^*(4 + 7^*q2^2)) + \\
& p2^2*(17 - 24^*q2^2 + 2^*q1^2*(-6 + 43^*q2^2))) + \\
& p1^3*p2^2*q1^2*q2^2*(2^*p2^4*(-6 + 43^*q1^2) - 8^*p2^3*(7 + 13^*q1^2)*q2 - \\
& 8^*p2^2*q2*(4 + 7^*q2^2 + q1^2*(-4 + 13^*q2^2)) + \\
& p2^2*(17 - 24^*q2^2 + 4^*q1^2*(-6 + 79^*q2^2)) + \\
& q2^2*(17 - 12^*q2^2 + q1^2*(-24 + 86^*q2^2)))) - \\
& b2^*p1^2*p2^2*q1^2*q2^2*\text{sigm}^2*(b2^2*(p2^2 + q2^2) + 2^*\text{sigm}^2) +
\end{aligned}$$



$$\begin{aligned}
& 2^*b2^*b3^{\wedge 2^*}(b2^{\wedge 2^*}p2^*q2^*(2^*p1^{\wedge 4^*}p2^*q2^*(p2^{\wedge 2^*} + q2^{\wedge 2^*}) + \\
& 2^*p2^*q1^{\wedge 2^*}(-1 + q1^{\wedge 2^*})q2^*(p2^{\wedge 2^*} + q2^{\wedge 2^*}) - \\
& p1^{\wedge 2^*}(3^*p2^{\wedge 4^*}q1^{\wedge 2^*} - 2^*p2^{\wedge 3^*}(-1 + q1^{\wedge 2^*})q2 + 54^*p2^{\wedge 2^*}q1^{\wedge 2^*}q2^{\wedge 2^*} - \\
& 2^*p2^*(-1 + q1^{\wedge 2^*})q2^{\wedge 3^*} + 3^*q1^{\wedge 2^*}q2^{\wedge 4^*}) + \\
& p1^{\wedge 3^*}q1^*(-4^*p2^{\wedge 4^*} + p2^{\wedge 3^*}q2 + p2^*q2^*(-8 + q2^{\wedge 2^*}) - \\
& 4^*q2^{\wedge 2^*}(-1 + q2^{\wedge 2^*}) + 4^*p2^{\wedge 2^*}(1 + 9^*q2^{\wedge 2^*})) + \\
& p1^*q1^{\wedge 3^*}(-4^*p2^{\wedge 4^*} + p2^{\wedge 3^*}q2 + p2^*q2^*(-8 + q2^{\wedge 2^*}) - \\
& 4^*q2^{\wedge 2^*}(-1 + q2^{\wedge 2^*}) + 4^*p2^{\wedge 2^*}(1 + 9^*q2^{\wedge 2^*})) + \\
& (-3^*p1^{\wedge 4^*}p2^*q2^*(p2^{\wedge 2^*} + q2^{\wedge 2^*}) - 3^*p2^*q1^{\wedge 2^*}(-1 + q1^{\wedge 2^*})q2^* \\
& (p2^{\wedge 2^*} + q2^{\wedge 2^*}) + p1^{\wedge 2^*}p2^*q2^*(p2^{\wedge 2^*}(3 + 4^*q1^{\wedge 2^*}) + 8^*p2^*q1^{\wedge 2^*}q2 + \\
& (3 + 4^*q1^{\wedge 2^*})q2^{\wedge 2^*}) + p1^{\wedge 3^*}q1^*(-3^*p2^{\wedge 4^*} + p2^{\wedge 3^*}q2 + \\
& p2^*q2^*(-8 + q2^{\wedge 2^*}) - 3^*q2^{\wedge 2^*}(-1 + q2^{\wedge 2^*}) + p2^{\wedge 2^*}(3 + 4^*q2^{\wedge 2^*})) + \\
& p1^*(-3^*p2^{\wedge 4^*}q1^{\wedge 3^*} + p2^{\wedge 3^*}q1^*(-8 + q1^{\wedge 2^*})q2 - 3^*q1^{\wedge 3^*}q2^{\wedge 2^*} \\
& (-1 + q2^{\wedge 2^*}) + p2^{\wedge 2^*}q1^{\wedge 3^*}(3 + 4^*q2^{\wedge 2^*}) + \\
& p2^*(-8^*q1^*q2^{\wedge 3^*} + q1^{\wedge 3^*}q2^*(-8 + q2^{\wedge 2^*}))) * \text{sigm}^{\wedge 2^*} - \\
& b3^{\wedge 3^*}(p1 - q1)^*(2^*b2^{\wedge 2^*}p2^*q2^*(6^*p1^{\wedge 4^*}p2^*q2^*(p2^{\wedge 2^*} + q2^{\wedge 2^*}) + \\
& 6^*p2^*q1^{\wedge 2^*}(-1 + q1^{\wedge 2^*})q2^*(p2^{\wedge 2^*} + q2^{\wedge 2^*}) + p1^{\wedge 2^*}(p2^{\wedge 2^*} + q2^{\wedge 2^*}) * \\
& (7^*p2^{\wedge 2^*}q1^{\wedge 2^*} + 6^*p2^*(-1 + 3^*q1^{\wedge 2^*})q2 + 7^*q1^{\wedge 2^*}q2^{\wedge 2^*}) + \\
& p1^{\wedge 3^*}q1^*(p2^{\wedge 4^*} + 7^*p2^{\wedge 3^*}q2 + q2^{\wedge 2^*}(-2 + q2^{\wedge 2^*}) + p2^*q2^*(8 + 7^*q2^{\wedge 2^*}) - \\
& 2^*p2^{\wedge 2^*}(1 + 33^*q2^{\wedge 2^*})) + p1^*q1^*(p2^{\wedge 4^*}(6 + q1^{\wedge 2^*}) + \\
& p2^{\wedge 3^*}(12 + 7^*q1^{\wedge 2^*})q2 + q2^{\wedge 2^*}(-5 + 6^*q2^{\wedge 2^*} + q1^{\wedge 2^*}(-2 + q2^{\wedge 2^*})) + \\
& p2^*q2^*(8 + 12^*q2^{\wedge 2^*} + q1^{\wedge 2^*}(8 + 7^*q2^{\wedge 2^*})) - \\
& p2^{\wedge 2^*}(5 - 12^*q2^{\wedge 2^*} + q1^{\wedge 2^*}(2 + 66^*q2^{\wedge 2^*}))) + \\
& (6^*p1^{\wedge 4^*}p2^*q2^*(p2^{\wedge 2^*} + q2^{\wedge 2^*}) + 6^*p2^*q1^{\wedge 2^*}(-1 + q1^{\wedge 2^*})q2^*(p2^{\wedge 2^*} + q2^{\wedge 2^*}) + \\
& p1^{\wedge 2^*}(6^*p2^{\wedge 4^*}q1^{\wedge 2^*} + 2^*p2^{\wedge 3^*}(-3 + 20^*q1^{\wedge 2^*})q2 - 60^*p2^{\wedge 2^*}q1^{\wedge 2^*}q2^{\wedge 2^*} + \\
& 2^*p2^*(-3 + 20^*q1^{\wedge 2^*})q2^{\wedge 3^*} + 6^*q1^{\wedge 2^*}q2^{\wedge 4^*}) - \\
& p1^{\wedge 3^*}q1^*(p2^{\wedge 4^*} - 10^*p2^{\wedge 3^*}q2 + q2^{\wedge 2^*}(-4 + q2^{\wedge 2^*}) + 2^*p2^{\wedge 2^*}(-2 + q2^{\wedge 2^*}) + \\
& p2^*(8^*q2 - 10^*q2^{\wedge 3^*})) + p1^*q1^*(-(p2^{\wedge 4^*}(-2 + q1^{\wedge 2^*})) + \\
& 2^*p2^{\wedge 3^*}(2 + 5^*q1^{\wedge 2^*})q2 + q2^{\wedge 2^*}(-5 + 2^*q2^{\wedge 2^*} - q1^{\wedge 2^*}(-4 + q2^{\wedge 2^*})) + \\
& p2^{\wedge 2^*}(-5 + 4^*q2^{\wedge 2^*} - 2^*q1^{\wedge 2^*}(-2 + q2^{\wedge 2^*})) + \\
& 2^*p2^*q2^*(2^*(3 + q2^{\wedge 2^*}) + q1^{\wedge 2^*}(-4 + 5^*q2^{\wedge 2^*}))) * \text{sigm}^{\wedge 2^*} + \\
& b3^*(p1 - q1)^*(4^*b2^{\wedge 4^*}p2^{\wedge 2^*}q2^{\wedge 2^*}(p2^{\wedge 2^*}(-1 + p1^{\wedge 2^*} + 2^*p1^*q1 + q1^{\wedge 2^*}) + \\
& 4^*p1^*p2^*q1^*q2 + (-1 + p1^{\wedge 2^*} + 2^*p1^*q1 + q1^{\wedge 2^*})q2^{\wedge 2^*}) - \\
& b2^{\wedge 2^*}p1^*p2^*q1^*q2^*(3^*p2^{\wedge 2^*} + 4^*p2^*q2 + 3^*q2^{\wedge 2^*}) * \text{sigm}^{\wedge 2^*} - \\
& (p2^{\wedge 2^*}(-1 + p1^{\wedge 2^*} + 2^*p1^*q1 + q1^{\wedge 2^*}) + 8^*p1^*p2^*q1^*q2 + \\
& (-1 + p1^{\wedge 2^*} + 2^*p1^*q1 + q1^{\wedge 2^*})q2^{\wedge 2^*}) * \text{sigm}^{\wedge 4^*}) - \\
& b3^*(p2 - q2)^*(b3^{\wedge 5^*}(p1 - q1)^*(4^*p1^{\wedge 6^*}p2^{\wedge 2^*}q2^{\wedge 2^*} + 4^*p2^{\wedge 2^*}q1^{\wedge 4^*}(-1 + q1^{\wedge 2^*}) * \\
& q2^{\wedge 2^*} + p1^{\wedge 5^*}p2^*q1^*q2^*(-3^*p2^{\wedge 4^*} + 4^*p2^{\wedge 3^*}q2 + 4^*q2^{\wedge 2^*} - 3^*q2^{\wedge 4^*} + \\
& p2^{\wedge 2^*}(4 - 6^*q2^{\wedge 2^*}) + 4^*p2^*q2^*(-2 + q2^{\wedge 2^*})) + \\
& 4^*p1^{\wedge 4^*}p2^*q2^*(p2^{\wedge 4^*}q1^{\wedge 2^*} - 2^*p2^{\wedge 3^*}q1^{\wedge 2^*}q2 + 2^*p2^{\wedge 2^*}q1^{\wedge 2^*}q2^{\wedge 2^*} + \\
& q1^{\wedge 2^*}q2^{\wedge 4^*} - p2^*(q2 - 3^*q1^{\wedge 2^*}q2 + 2^*q1^{\wedge 2^*}q2^{\wedge 3^*})) + \\
& 4^*p1^{\wedge 2^*}q1^{\wedge 2^*}(p2^{\wedge 6^*} + p2^{\wedge 5^*}(-2 + q1^{\wedge 2^*})q2 + q2^{\wedge 4^*}(-1 + q2^{\wedge 2^*}) + \\
& p2^{\wedge 4^*}(-1 + (3 - 2^*q1^{\wedge 2^*})q2^{\wedge 2^*}) + 2^*p2^{\wedge 3^*}q2^*(2 + (-2 + q1^{\wedge 2^*})q2^{\wedge 2^*}) + \\
& p2^*q2^{\wedge 3^*}(4 + (-2 + q1^{\wedge 2^*})q2^{\wedge 2^*}) + p2^{\wedge 2^*}q2^{\wedge 2^*}(-8 + 3^*q2^{\wedge 2^*} + \\
& q1^{\wedge 2^*}(3 - 2^*q2^{\wedge 2^*})) + p1^{\wedge 3^*}p2^*q1^*q2^*(p2^{\wedge 4^*}(4 - 6^*q1^{\wedge 2^*}) + \\
& 8^*p2^{\wedge 3^*}q1^{\wedge 2^*}q2 + p2^{\wedge 2^*}(-5 + 8^*q2^{\wedge 2^*} + q1^{\wedge 2^*}(8 - 12^*q2^{\wedge 2^*})) + \\
& q2^{\wedge 2^*}(-5 + 4^*q2^{\wedge 2^*} + q1^{\wedge 2^*}(8 - 6^*q2^{\wedge 2^*})) + \\
& 8^*p2^*q2^*(2 + q1^{\wedge 2^*}(-2 + q2^{\wedge 2^*})) + p1^*p2^*q1^{\wedge 3^*}q2^* \\
& (p2^{\wedge 4^*}(4 - 3^*q1^{\wedge 2^*}) + 4^*p2^{\wedge 3^*}q1^{\wedge 2^*}q2 + \\
& p2^{\wedge 2^*}(-5 + 8^*q2^{\wedge 2^*} + q1^{\wedge 2^*}(4 - 6^*q2^{\wedge 2^*})) + \\
& q2^{\wedge 2^*}(-5 + 4^*q2^{\wedge 2^*} + q1^{\wedge 2^*}(4 - 3^*q2^{\wedge 2^*})) + \\
& 4^*p2^*q2^*(4 + q1^{\wedge 2^*}(-2 + q2^{\wedge 2^*}))) + \\
& b2^*b3^{\wedge 4^*}(2^*p1^{\wedge 6^*}p2^{\wedge 2^*}q2^{\wedge 2^*}(4 + p2^{\wedge 2^*} + 2^*p2^*q2 + q2^{\wedge 2^*}) + \\
& 2^*p2^{\wedge 2^*}q1^{\wedge 4^*}q2^{\wedge 2^*}(-5 + q1^{\wedge 2^*}(4 + p2^{\wedge 2^*} + 2^*p2^*q2 + q2^{\wedge 2^*})) - \\
& p1^{\wedge 5^*}p2^*q1^*q2^*(p2^{\wedge 4^*} - 12^*p2^{\wedge 3^*}q2 + 26^*p2^{\wedge 2^*}q2^{\wedge 2^*} + q2^{\wedge 4^*} - \\
& 4^*p2^*q2^*(-4 + 3^*q2^{\wedge 2^*})) + 2^*p1^{\wedge 4^*}(4^*p2^{\wedge 6^*}q1^{\wedge 2^*} + 2^*p2^{\wedge 5^*}q1^{\wedge 2^*}q2 +
\end{aligned}$$

$$\begin{aligned}
& 4^*q1^2*q2^4*(-1 + q2^2) - p2^4*q1^2*(4 + q2^2) + \\
& 2^*p2^*q1^2*q2^3*(4 + q2^2) + 2^*p2^3*q1^2*q2*(4 + 13*q2^2) - \\
& p2^2*q2^2*(5 + q1^2*(-4 + q2^2)) - p1^*p2^*q1^3*q2^* \\
& (p2^4*(-8 + q1^2) - 12^*p2^3*q1^2*q2 + q2^2*(7 + (-8 + q1^2)*q2^2) + \\
& p2^2*(7 + 2^*(-8 + 13*q1^2)*q2^2) - 4^*p2^*q2^* \\
& (11 + q1^2*(-4 + 3*q2^2))) + p1^3*p2^*q1^*q2*(p2^4*(8 - 10*q1^2) + \\
& 40^*p2^3*q1^2*q2 - 7^*q2^2 + (8 - 10*q1^2)*q2^4 + \\
& p2^2*(-7 + (16 - 68*q1^2)*q2^2) + 4^*p2^*q2^* \\
& (11 + 2^*q1^2*(-4 + 5*q2^2))) + 2^*p1^2*q1^2*(4^*p2^6*q1^2 + \\
& 2^*p2^5*(-4 + q1^2)*q2 + 4^*q1^2*q2^4*(-1 + q2^2) - \\
& p2^4*q1^2*(4 + q2^2) - p2^2*q2^2*(34 + q1^2*(-4 + q2^2)) + \\
& 2^*p2^*q2^3*(4 - 4^*q2^2 + q1^2*(4 + q2^2)) + \\
& 2^*p2^3*q2*(4 - 8^*q2^2 + q1^2*(4 + 13*q2^2)))) + \\
& b2^*sigm^2*(b2^2*p2^*q2*(2^*p1^2*(-1 + p2^2 + 2^*p2^*q2 + q2^2) + \\
& 2^*q1^2*(-1 + p2^2 + 2^*p2^*q2 + q2^2) + p1^*q1*(p2^2 + 12^*p2^*q2 + \\
& q2^2)) + (8^*p1^*p2^*q1^*q2 + p1^2*(-1 + p2^2 + 2^*p2^*q2 + q2^2) + \\
& q1^2*(-1 + p2^2 + 2^*p2^*q2 + q2^2))*sigm^2) + \\
& b2^*b3^2*(2^*b2^2*p2^*q2*(p1^4*p2^*q2*(-4 + 3^*p2^2 + 6^*p2^*q2 + 3^*q2^2) + \\
& p2^*q1^2*q2*(1 + q1^2*(-4 + 3^*p2^2 + 6^*p2^*q2 + 3^*q2^2)) + \\
& p1^3*q1*(2^*p2^4 - 5^*p2^3*q2 + 2^*q2^2*(-1 + q2^2) - \\
& 2^*p2^2*(1 + 14^*q2^2) + p2^*(8^*q2 - 5^*q2^3)) + \\
& p1^*q1^3*(2^*p2^4 - 5^*p2^3*q2 + 2^*q2^2*(-1 + q2^2) - \\
& 2^*p2^2*(1 + 14^*q2^2) + p2^*(8^*q2 - 5^*q2^3)) + \\
& p1^2*(p2^4*q1^2 + 12^*p2^3*q1^2*q2 + 46^*p2^2*q1^2*q2^2 + q1^2*q2^4 + \\
& p2^*(q2 - 8^*q1^2*q2 + 12^*q1^2*q2^3))) + \\
& (- (p1^4*p2^*q2*(-2 + p2^2 - 6^*p2^*q2 + q2^2)) + \\
& p1^2*p2^*q2*(-5 - 2^*p2^2*(-2 + q1^2) - 60^*p2^*q1^2*q2 + 4^*q2^2 - \\
& 2^*q1^2*(-2 + q2^2)) + p2^*q1^2*q2*(-5 - p2^2*(-4 + q1^2) + \\
& 6^*p2^*q1^2*q2 + 4^*q2^2 - q1^2*(-2 + q2^2)) + \\
& 2^*p1^3*q1*(3^*p2^4 + 5^*p2^3*q2 + 3^*q2^2*(-1 + q2^2) + \\
& p2^*q2*(2 + 5^*q2^2) + p2^2*(-3 + 20^*q2^2)) + \\
& 2^*p1^*q1*(3^*p2^4*q1^2 + p2^3*(-4 + 5^*q1^2)*q2 + \\
& 3^*q1^2*q2^2*(-1 + q2^2) + p2^2*q1^2*(-3 + 20^*q2^2) + \\
& p2^*q2*(6 - 4^*q2^2 + q1^2*(2 + 5^*q2^2))))*sigm^2) + \\
& 2^*b3^3*(p1 - q1)*(b2^2*p2^*q2*(3^*p1^4*p2^*q2*(p2 + q2)^2 + \\
& 3^*p2^*q1^2*q2*(-1 + p2^2*q1^2 + 2^*p2^*q1^2*q2 + q1^2*q2^2) + \\
& p1^3*q1*(3^*p2^4 + 5^*p2^3*q2 + q2^2*(-4 + 3^*q2^2) + \\
& p2^*q2*(4 + 5^*q2^2) - 2^*p2^2*(2 + 11^*q2^2)) + \\
& p1^2*(p2^4*q1^2 + 12^*p2^3*q1^2*q2 + 30^*p2^2*q1^2*q2^2 + q1^2*q2^4 + \\
& 3^*p2^*q2*(-1 + 4^*q1^2*q2^2)) + p1^*q1*(p2^4*(2 + 3^*q1^2) + \\
& 5^*p2^3*q1^2*q2 + q2^2*(-1 + 2^*q2^2 + q1^2*(-4 + 3^*q2^2)) + \\
& p2^*q2*(10 + q1^2*(4 + 5^*q2^2)) - p2^2*(1 - 4^*q2^2 + \\
& q1^2*(4 + 22^*q2^2)))) + (- (p1^4*p2^*q2*(-2 + p2^2 + q2^2)) - \\
& p2^*q1^2*(-1 + q1^2)*q2*(-2 + p2^2 + q2^2) + \\
& p1^3*q1*(-p2^4 + 3^*p2^3*q2 + q2^2 - q2^4 + p2^*q2*(-2 + 3^*q2^2) + \\
& p2^2*(1 + 6^*q2^2)) + p1^2*p2^*q2*(-2 + p2^2*(1 + 6^*q1^2) - \\
& 16^*p2^*q1^2*q2 + q2^2 + q1^2*(4 + 6^*q2^2)) + \\
& p1^*q1*(-(p2^4*(-2 + q1^2)) + p2^3*(-2 + 3^*q1^2)*q2 - \\
& (-2 + q1^2)*q2^2*(-1 + q2^2) + p2^*q2*(6 - 2^*q2^2 + \\
& q1^2*(-2 + 3^*q2^2)) + p2^2*(-2 + 4^*q2^2 + q1^2*(1 + 6^*q2^2))))* \\
& sigm^2) + b3*(p1 - q1)*(2^*b2^4*p2^2*q2^2* \\
& (1 + p1^2*(-2 + p2^2 + 2^*p2^*q2 + q2^2) + \\
& q1^2*(-2 + p2^2 + 2^*p2^*q2 + q2^2) - 2^*p1^*q1*(p2^2 + 4^*p2^*q2 + \\
& q2^2)) + b2^2*p2^*q2*(-1 - 4^*q1^2 + p2^2*(2 + 3^*q1^2) + \\
& 10^*p2^*q1^2*q2 + 2^*q2^2 + 3^*q1^2*q2^2 + \\
& p1^*q1*(p2^2 + 40^*p2^*q2 + q2^2) + p1^2*(-4 + 3^*p2^2 + 10^*p2^*q2 +
\end{aligned}$$

$$\begin{aligned}
& 3^*q2^2))^{*sigm^2} - ((-14^*p1^*p2^*q1^*q2 + p1^2^*(-1 + p2^2 + q2^2) + \\
& (-1 + q1^2)^*(-1 + p2^2 + q2^2))^{*sigm^4}))/ \\
& (2^*(p1^*q1^*(2^*b2^2^*p2^*q2 + 4^*b2^*b3^*p2^*(p1 - q1)^*q2 + \\
& 2^*b3^2^*p2^*(p1^2 + q1^2)^*q2 + sigm^2))^{\wedge(3/2)^*} \\
& (p2^*q2^*(2^*b1^2^*p1^*q1 + 4^*b1^*b3^*p1^*q1^*(p2 - q2) + \\
& 2^*b3^2^*p1^*q1^*(p2^2 + q2^2) + sigm^2))^{\wedge(3/2)^*}
\end{aligned}$$

When  $b_3 = 0$ ,  $Cov(T_1, T_2)$  is still nonzero:

$$\begin{aligned}
& Cov(T_1, T_2) = \\
& -(b1^*b2^*p1^2^*p2^2^*q1^2^*q2^2^*(b2^2^*(p2^2 + q2^2)^*sigm^2 + 2^*sigm^4 + \\
& b1^2^*(2^*b2^2^*(p1^*p2^2^*q1 + p2^*(p1^2 - 8^*p1^*q1 + q1^2)^*q2 + p1^*q1^*q2^2) + \\
& (p1^2 + q1^2)^*sigm^2)))/ (2^*(p2^*q2^*(2^*b1^2^*p1^*q1 + sigm^2))^{\wedge(3/2)^*} \\
& (p1^*q1^*(2^*b2^2^*p2^*q2 + sigm^2))^{\wedge(3/2)^*}
\end{aligned}$$

$$\begin{aligned}
& E(T_{12}) \rightarrow \sqrt{n-4}h_{12}(\boldsymbol{\theta}) = \\
& \text{sqrt}(2/3)^*\text{sqrt}(n)^*\text{sqrt}((b1^2^*p1^*q1 + 2^*b1^*b3^*p1^*q1^*(p2 - q2) + b2^2^*p2^*q2 + \\
& 2^*b2^*b3^*p2^*(p1 - q1)^*q2 + b3^2^*(p1^*q1^*(p2 - q2)^2 + p1^2^*p2^*q2 + \\
& p2^*q1^2^*q2))/sigm^2)
\end{aligned}$$

$$\begin{aligned}
& Var(T_{12}) \rightarrow [\nabla h_{12}(\boldsymbol{\theta})]' \Sigma [\nabla h_{12}(\boldsymbol{\theta})] = \\
& (2^*b1^4^*p1^*q1^*(p1^2 + 4^*p1^*q1 + q1^2) + 8^*b1^3^*b3^*p1^*q1^* \\
& (p1^2 + 4^*p1^*q1 + q1^2)^*(p2 - q2) + 2^*b2^4^*p2^*q2^*(p2^2 + 4^*p2^*q2 + q2^2) + \\
& 8^*b2^3^*b3^*p2^*(p1 - q1)^*q2^*(p2^2 + 4^*p2^*q2 + q2^2) + \\
& 4^*b1^2^*(8^*b2^2^*p1^*p2^*q1^*q2 - 2^*b2^*b3^*(p1 - q1)^* \\
& (p2^2^*(-1 + p1^2 + 2^*p1^*q1 + q1^2) - 2^*p1^*p2^*q1^*q2 + \\
& (-1 + p1^2 + 2^*p1^*q1 + q1^2)^*q2^2) + \\
& b3^2^*(p1^4^*(p2^2 + q2^2) + q1^2^*(-1 + q1^2)^*(p2^2 + q2^2) + \\
& p1^2^*(-1 + 6^*q1^2)^*(p2^2 + q2^2) + p1^3^*q1^*(p2^2 - 4^*p2^*q2 + q2^2) + \\
& p1^*q1^*(p2^2^*(4 + q1^2) - 4^*p2^*q1^2^*q2 + (4 + q1^2)^*q2^2)) + \\
& 2^*p1^*q1^*sigm^2) + 8^*b2^*b3^*(p1 - q1)^* \\
& (b3^2^*(-(p2^2^*q1^2) + p2^4^*q1^2 - 4^*p1^*p2^*q1^*(p2 - q2)^2^*q2 + \\
& p2^*(q2 + 2^*q1^2^*q2) + q1^2^*q2^2^*(-1 + q2^2) + \\
& p1^2^*(-p2^2 + p2^4 + 2^*p2^*q2 - q2^2 + q2^4)) + 2^*p2^*q2^*sigm^2) + \\
& 4^*b2^2^*(b3^2^*(-4^*p1^*p2^*q1^*q2^*(p2^2 + q2^2) + \\
& p1^2^*(p2^4 + p2^3^*q2 + q2^2^*(-1 + q2^2) + p2^*q2^*(4 + q2^2) + \\
& p2^2^*(-1 + 6^*q2^2)) + q1^2^*(p2^4 + p2^3^*q2 + q2^2^*(-1 + q2^2) + \\
& p2^*q2^*(4 + q2^2) + p2^2^*(-1 + 6^*q2^2))) + 2^*p2^*q2^*sigm^2) + \\
& b3^2^*(b3^2^*(-16^*p1^3^*p2^*q1^*(p2 - q2)^2^*q2 - 8^*p1^*q1^*(p2 - q2)^2^* \\
& (-1 + 2^*p2^*q1^2^*q2) + p1^4^*(3^*p2^4 - 2^*p2^2^*q2^2 + 3^*q2^4) + \\
& q1^2^*(3^*p2^4^*q1^2 + 8^*p2^*q2 + 3^*q2^2^*(-1 + q1^2^*q2^2) - \\
& p2^2^*(3 + 2^*q1^2^*q2^2)) - p1^2^*(2^*p2^4^*q1^2 - 32^*p2^3^*q1^2^*q2 + \\
& q2^2^*(3 + 2^*q1^2^*q2^2) + p2^2^*(3 + 52^*q1^2^*q2^2) - \\
& 8^*p2^*(q2 + 4^*q1^2^*q2^3))) + 8^*(p1^*q1^*(p2 - q2)^2 + p1^2^*p2^*q2 + \\
& p2^*q1^2^*q2)^*sigm^2) - 4^*b1^*b3^*(p2 - q2)^* \\
& (2^*b2^2^*(-2^*p1^*p2^*q1^*q2 + p1^2^*(-1 + p2^2 + 2^*p2^*q2 + q2^2) + \\
& q1^2^*(-1 + p2^2 + 2^*p2^*q2 + q2^2)) - b2^*b3^*(p1 - q1)^* \\
& (3 - 2^*q1^2 + p2^2^*(-2 + q1^2) - 2^*p2^*q1^2^*q2 - 2^*q2^2 + q1^2^*q2^2 + \\
& p1^2^*(-2 + p2^2 - 2^*p2^*q2 + q2^2) - 2^*p1^*q1^*(p2^2 + 8^*p2^*q2 + q2^2)) - \\
& 2^*(b3^2^*(-4^*p1^3^*p2^*q1^*q2 + p1^4^*(p2^2 + q2^2) + q1^2^*(-1 + q1^2)^* \\
& (p2^2 + q2^2) - p1^2^*(p2^2 - 8^*p2^*q1^2^*q2 + q2^2) + \\
& p1^*(q1 + 2^*p2^2^*q1 - 4^*p2^*q1^3^*q2 + 2^*q1^*q2^2)) + 2^*p1^*q1^*sigm^2)))/ \\
& (24^*(b1^2^*p1^*q1 + 2^*b1^*b3^*p1^*q1^*(p2 - q2) + b2^2^*p2^*q2 + \\
& 2^*b2^*b3^*p2^*(p1 - q1)^*q2 + b3^2^*(p1^*q1^*(p2 - q2)^2 + p1^2^*p2^*q2 + \\
& p2^*q1^2^*q2))^*sigm^2)
\end{aligned}$$

$$Cov(T_{12}, T_1) = \tau_{12,1} \rightarrow [\nabla h_{12}(\boldsymbol{\theta})]' \Sigma [\nabla h_1(\boldsymbol{\theta})] =$$

$$\begin{aligned}
& (p1^*q1^*(b1^2*b3*p1^*q1^*(p2 - q2)^* \\
& (2*b2^2*(12*p1^*p2^*q1^*q2 + p1^2*(-2 + 2*p2^2 + 7*p2^*q2 + 2*q2^2) + \\
& q1^2*(-2 + 2*p2^2 + 7*p2^*q2 + 2*q2^2)) - 2*b2*b3*(p1 - q1)^* \\
& (3 - 2*q1^2 + p2^2*(-6 + 5*q1^2) - 8*p2^*q1^2*q2 - 6*q2^2 + \\
& 5*q1^2*q2^2 + 6*p1^*q1^*(p2^2 - 6*p2^*q2 + q2^2) + \\
& p1^2*(-2 + 5*p2^2 - 8*p2^*q2 + 5*q2^2)) + \\
& b3^2*(6*p1^4*p2^*q2 + 6*p2^*q1^4*q2 - 4*p1^3*q1^*(p2^2 - 7*p2^*q2 + q2^2) - \\
& 4*p1^2*q1^2*(2*p2^2 + p2^*q2 + 2*q2^2) - \\
& 4*p1^*q1^*(1 + p2^2*(-2 + q1^2) - 7*p2^*q1^2*q2 + (-2 + q1^2)*q2^2)) + \\
& 3*(p1^2 + 4*p1^*q1 + q1^2)*\text{sigm}^2) + \\
& b1^3*p1^*q1^*(4*b2*b3*p2^*(p1 - q1)*(p1 + q1)^2*q2 + \\
& 2*b2^2*p2^*(p1^2 + q1^2)*q2 + (p1^2 + 4*p1^*q1 + q1^2)* \\
& (2*b3^2*p2^*(p1 - q1)^2*q2 + \text{sigm}^2)) - \\
& b1^*(2*b2^4*p1^*p2^*q1^*q2^*(p2^2 - 8*p2^*q2 + q2^2) + \\
& 8*b2^3*b3*p2^*(p1 - q1)*q2^*(p2^2*(-1 + p1^2 + 3*p1^*q1 + q1^2) - \\
& 3*p1^*p2^*q1^*q2 + (-1 + p1^2 + 3*p1^*q1 + q1^2)*q2^2) - \\
& b3^4*(4*p1^6*p2^*q2^*(p2^2 + q2^2) + 4*p2^*q1^4*(-1 + q1^2)*q2^* \\
& (p2^2 + q2^2) + p1^5*q1^*(p2^4 - 10*p2^3*q2 + 2*p2^2*q2^2 - \\
& 10*p2^*q2^3 + q2^4) + p1^4*(-6*p2^4*q1^2 + 4*p2^3*(-1 + 6*q1^2)*q2 + \\
& 4*p2^2*q1^2*q2^2 + 4*p2*(-1 + 6*q1^2)*q2^3 - 6*q1^2*q2^4) - \\
& 2*p1^2*q1^2*(p2^4*(-8 + 3*q1^2) - 4*p2^3*(-5 + 3*q1^2)*q2 - \\
& 2*p2^2*(-2 + (8 + q1^2)*q2^2) + q2^2*(4 + (-8 + 3*q1^2)*q2^2) - \\
& 4*p2^*q2^*(2 + (-5 + 3*q1^2)*q2^2)) + \\
& p1^*q1^3*(p2^4*(-4 + q1^2) + 2*p2^3*(12 - 5*q1^2)*q2 + \\
& q2^2*(3 + (-4 + q1^2)*q2^2) + p2^2*(3 + 2*(-4 + q1^2)*q2^2) - \\
& 2*p2^*q2^*(4 + (-12 + 5*q1^2)*q2^2)) + \\
& p1^3*q1^*(-2*p2^4*(2 + 7*q1^2) + 4*p2^3*(6 + 7*q1^2)*q2 + 3*q2^2 - \\
& 2*(2 + 7*q1^2)*q2^4 + 4*p2^2*q2^*(-2 + (6 + 7*q1^2)*q2^2) + \\
& p2^2*(3 - 4*(2 + 15*q1^2)*q2^2))) + \\
& b3^2*(-2*p1^4*(p2^2 + q2^2) - 2*q1^2*(-1 + q1^2)*(p2^2 + q2^2) + \\
& p1^3*q1^*(p2^2 + 4*p2^*q2 + q2^2) + 2*p1^2*(p2^2 - 8*p2^*q1^2*q2 + \\
& q2^2) + p1^*q1^*(p2^2*(-8 + q1^2) + 4*p2^*q1^2*q2 + (-8 + q1^2)*q2^2))* \\
& \text{sigm}^2 - 4*p1^*q1^*\text{sigm}^4 + \\
& 2*b2^2*(b3^2*(6*p1^4*p2^*q2^*(p2^2 + q2^2) + 6*p2^*q1^2*(-1 + q1^2)*q2^* \\
& (p2^2 + q2^2) - 2*p1^2*p2^*q2^*(p2^2*(3 + 14*q1^2) - 4*p2^*q1^2*q2 + \\
& (3 + 14*q1^2)*q2^2) + p1^3*q1^*(2*p2^4 + 3*p2^3*q2 + \\
& 2*q2^2*(-1 + q2^2) - 2*p2^2*(1 + 2*q2^2) + p2^*q2^*(8 + 3*q2^2)) + \\
& p1^*q1^*(2*p2^4*q1^2 + p2^3*(8 + 3*q1^2)*q2 + 2*q1^2*q2^2* \\
& (-1 + q2^2) - 2*p2^2*q1^2*(1 + 2*q2^2) + \\
& p2^*(8*q2^3 + q1^2*q2^*(8 + 3*q2^2)))) - 6*p1^*p2^*q1^*q2^*\text{sigm}^2) + \\
& 4*b2*b3*(p1 - q1)*(b3^2*p1^*q1^*(p2^4*(-2 + 4*q1^2) + \\
& p2^3*(-4 + q1^2)*q2 - 2*q1^2*q2^2 - 2*q2^4 + 4*q1^2*q2^4 + \\
& 2*p1^*q1^*(2*p2^4 - 5*p2^3*q2 + 2*p2^2*q2^2 - 5*p2^*q2^3 + 2*q2^4) + \\
& p2^*q2^*(2 - 4*q2^2 + q1^2*(4 + q2^2)) + \\
& p1^2*(4*p2^4 + p2^3*q2 - 2*q2^2 + 4*q2^4 + p2^*q2^*(4 + q2^2) + \\
& p2^2*(-2 + 6*q2^2)) + p2^2*(-4*q2^2 + q1^2*(-2 + 6*q2^2))) + \\
& (p2^2*(-1 + p1^2 + 2*p1^*q1 + q1^2) - p1^*p2^*q1^*q2 + \\
& (-1 + p1^2 + 2*p1^*q1 + q1^2)*q2^2)*\text{sigm}^2) - \\
& b3*(p2 - q2)*(2*b2^4*p2^*q2^*(2*p1^2*(-1 + p2^2 + 2*p2^*q2 + q2^2) + \\
& 2*q1^2*(-1 + p2^2 + 2*p2^*q2 + q2^2) + p1^*q1^*(p2^2 + 4*p2^*q2 + q2^2)) + \\
& 2*b2^3*b3*p2^*(p1 - q1)*q2^*(-3 - 2*q1^2 + p2^2*(2 + 3*q1^2) + \\
& 10*p2^*q1^2*q2 + 2*q2^2 + 3*q1^2*q2^2 + \\
& 6*p1^*q1^*(p2^2 + 6*p2^*q2 + q2^2) + p1^2*(-2 + 3*p2^2 + 10*p2^*q2 + \\
& 3*q2^2)) + b3^4*(-4*p1^6*p2^*q2^*(p2^2 + q2^2) - \\
& 4*p2^*q1^4*(-1 + q1^2)*q2^*(p2^2 + q2^2) - \\
& p1^5*q1^*(p2^4 - 10*p2^3*q2 - 6*p2^2*q2^2 - 10*p2^*q2^3 + q2^4) +
\end{aligned}$$

$$\begin{aligned}
& 2^*p1^4*(p2^4*q1^2 + 2^*p2^3*q2 - 14^*p2^2*q1^2*q2^2 + 2^*p2*q2^3 + \\
& q1^2*q2^4) + p1*q1^3*(-(p2^4*(-4 + q1^2)) + 2^*p2^3*(-8 + 5*q1^2)* \\
& q2 - q2^2*(3 + (-4 + q1^2)*q2^2) + \\
& 2^*p2*q2*(2 + (-8 + 5*q1^2)*q2^2) + p2^2*(-3 + (8 + 6*q1^2)*q2^2)) + \\
& 2^*p1^2*q1^2*(p2^4*(-4 + q1^2) + 12^*p2^3*q2 + 4^*p2*q2*(-1 + 3*q2^2) + \\
& q2^2*(2 + (-4 + q1^2)*q2^2) - 2^*p2^2*(-1 + (4 + 7*q1^2)*q2^2)) + \\
& p1^3*q1*(p2^4*(4 + 6*q1^2) - 4^*p2^3*(4 + 3*q1^2)*q2 - \\
& 4^*p2*q2*(-1 + (4 + 3*q1^2)*q2^2) + q2^2*(-3 + (4 + 6*q1^2)*q2^2) + \\
& p2^2*(-3 + (8 + 60*q1^2)*q2^2))) + \\
& b3^2*(-2^*p1^4*(p2^2 + q2^2) - 2^*q1^2*(-1 + q1^2)*(p2^2 + q2^2) + \\
& p1^3*q1*(p2^2 + 8^*p2*q2 + q2^2) + p1*q1*(-2 + p2^2*(-4 + q1^2) + \\
& 8^*p2*q1^2*q2 + (-4 + q1^2)*q2^2) + 2^*p1^2*(p2^2*(1 + 2*q1^2) - \\
& 8^*p2*q1^2*q2 + (1 + 2*q1^2)*q2^2))*\text{sigm}^2 - 4^*p1*q1*\text{sigm}^4 + \\
& 2^*b2^2*(b3^2*(-2^*p1^4*p2*q2*(-1 + p2^2 - 4^*p2*q2 + q2^2) + \\
& 2^*p2*q1^2*q2*(-(p2^2*(-3 + q1^2)) + 4^*p2*q1^2*q2 - \\
& (-3 + q1^2)*(-1 + q2^2)) - 2^*p1^2*p2*q2*(3 + p2^2*(-3 + 6*q1^2) + \\
& 40^*p2*q1^2*q2 - 3^*q2^2 + q1^2*(-2 + 6*q2^2)) + \\
& p1^3*q1*(4^*p2^4 + 11^*p2^3*q2 + 4^*q2^2*(-1 + q2^2) + \\
& p2^2*q2*(4 + 11*q2^2) + p2^2*(-4 + 48*q2^2)) + \\
& p1*q1*(4^*p2^4*q1^2 + p2^3*(-12 + 11*q1^2)*q2 + \\
& 4^*q1^2*q2^2*(-1 + q2^2) + 4^*p2^2*q1^2*(-1 + 12*q2^2) + \\
& p2^2*q2*(10 - 12*q2^2 + q1^2*(4 + 11*q2^2)))) + \\
& (p1^2 + q1^2)*(-1 + p2^2 + 2^*p2*q2 + q2^2)*\text{sigm}^2 - \\
& b2*b3*(p1 - q1)*(2^*b3^2*(p1^4*p2*q2*(-2 + 5^*p2^2 - 2^*p2*q2 + 5*q2^2) + \\
& p2^2*q1^2*q2*(3 + p2^2*(-6 + 5*q1^2) - 2^*p2*q1^2*q2 - 6*q2^2 + \\
& q1^2*(-2 + 5*q2^2)) - p1^3*q1*(3^*p2^4 + 8^*p2^3*q2 + \\
& q2^2*(-2 + 3*q2^2) + p2^2*(-2 + 30*q2^2) + 4^*p2*(q2 + 2*q2^3)) - \\
& p1^2*(2^*p2^4*q1^2 + 6^*p2^3*(1 + q1^2)*q2 - 32^*p2^2*q1^2*q2^2 + \\
& 2^*q1^2*q2^4 + p2^2*q2*(-3 + 6*q2^2 + q1^2*(4 + 6*q2^2))) - \\
& p1*q1*(p2^4*(2 + 3*q1^2) + 4^*p2^3*(-3 + 2*q1^2)*q2 + \\
& q2^2*(-3 + 2*q2^2 + q1^2*(-2 + 3*q2^2)) + \\
& 2^*p2*q2*(3 - 6*q2^2 + q1^2*(2 + 4*q2^2)) + \\
& p2^2*(-3 + 4*q2^2 + q1^2*(-2 + 30*q2^2)))) + \\
& (3 - 2*q1^2 + p2^2*(-2 + q1^2) - 2^*p2*q1^2*q2 - 2*q2^2 + q1^2*q2^2 + \\
& p1^2*(-2 + p2^2 - 2^*p2*q2 + q2^2) - 2^*p1*q1*(p2^2 + 10^*p2*q2 + \\
& q2^2))*\text{sigm}^2)))/ \\
& (4*\text{sqrt}(3)*\text{sqrt}((b1^2*p1*q1 + 2*b1*b3*p1*q1*(p2 - q2) + b2^2*p2*q2 + \\
& 2*b2*b3*p2*(p1 - q1)*q2 + b3^2*(p1*q1*(p2 - q2)^2 + p1^2*p2*q2 + \\
& p2^2*q1^2*q2))/\text{sigm}^2)*\text{sigm}^2* \\
& (p1*q1*(2*b2^2*p2*q2 + 4*b2*b3*p2*(p1 - q1)*q2 + 2*b3^2*p2*(p1^2 + q1^2)* \\
& q2 + \text{sigm}^2))^{\wedge}(3/2))
\end{aligned}$$

## 4.2 Mean and variance of $F_{3|1}$

For F statistic  $F_{3|1}$ , we have  $F_{3|1} \stackrel{(d)}{\cong} c\chi_d^2$ , where  $c = \frac{v}{2e}$ ,  $d = \frac{2e^2}{v}$  with

$$\begin{aligned}
& E(F_{3|1}) \rightarrow \frac{1}{2}\text{tr}(D^2(h_{3|1}(\theta_{13}))) \Sigma \equiv e = \\
& (0.125*(8*b2^2*p2*q2 + \\
& (b3*(b2*(p1 - q1)*(p2^2*(-1 + p1^2 + 2^*p1*q1 + q1^2)*(p3 - q3)^2 + \\
& (-1 + p1^2 + 2^*p1*q1 + q1^2)*q2^2*(p3 - q3)^2 - \\
& 2^*p2*q2*(p3^2*(-1 + p1^2 + 2^*p1*q1 + q1^2) - 4^*p1*p3*q1*q3 + \\
& (-1 + p1^2 + 2^*p1*q1 + q1^2)*q3^2)) + \\
& 2*b3*p1*q1*(p2^2*(-1 + p1^2 + 2^*p1*q1 + q1^2)*(p3 - q3)^2 + \\
& (-1 + p1^2 + 2^*p1*q1 + q1^2)*q2^2*(p3 - q3)^2 - \\
& 2^*p2*q2*(p3^2*(-1 + p1^2 + 2^*p1*q1 + q1^2) - 2^*p3*(p1 + q1)^2*q3 +
\end{aligned}$$

$$\begin{aligned}
& (-1 + p1^2 + 2*p1*q1 + q1^2)*q3^2)))/(p1*p3*q1*q3) + \\
& (8*b2^2*p1*p2*p3*q1*q2*q3 + b2*b3*(p1 - q1)* \\
& (p2^2*(-1 + p1^2 + 2*p1*q1 + q1^2)*(p3 - q3)^2 + \\
& (-1 + p1^2 + 2*p1*q1 + q1^2)*q2^2*(p3 - q3)^2 - \\
& 2*p2*q2*(p3^2*(-1 + p1^2 + 2*p1*q1 + q1^2) - 4*p1*p3*q1*q3 + \\
& (-1 + p1^2 + 2*p1*q1 + q1^2)*q3^2)) + \\
& b3^2*(-(p1^4*(p2^2*(p3 - q3)^2 + q2^2*(p3 - q3)^2 - \\
& 2*p2*q2*(p3^2 + q3^2))) - 2*p1*q1*(p2^2*(p3 - q3)^2 + \\
& q2^2*(p3 - q3)^2 - 2*p2*q2*(p3^2 + q3^2)) - \\
& q1^2*(-1 + q1^2)*(p2^2*(p3 - q3)^2 + q2^2*(p3 - q3)^2 - \\
& 2*p2*q2*(p3^2 + q3^2)) + p1^2*(p2^2*(1 + 2*q1^2)*(p3 - q3)^2 + \\
& (1 + 2*q1^2)*q2^2*(p3 - q3)^2 - 2*p2*q2*(p3^2*(1 + 2*q1^2) - \\
& 8*p3*q1^2*q3 + (1 + 2*q1^2)*q3^2)))/(p1*p3*q1*q3) + 8*sigm^2))/ \\
& (2*b2^2*p2*q2 + 4*b2*b3*p2*(p1 - q1)*q2 + 2*b3^2*p2*(p1^2 + q1^2)*q2 + \\
& sigm^2)
\end{aligned}$$

$$\begin{aligned}
& Var(F_{3|1}) \rightarrow \frac{1}{2}tr \left( [D^2(h_{3|1}(\theta_{13})) \Sigma]^2 \right) \equiv v = \\
& (0.03125*(64*b2^4*p2^2*q2^2 + \\
& (b3^2*(b2*(p1 - q1)*(p2^2*(-1 + p1^2 + 2*p1*q1 + q1^2)*(p3 - q3)^2 + \\
& (-1 + p1^2 + 2*p1*q1 + q1^2)*q2^2*(p3 - q3)^2 - \\
& 2*p2*q2*(p3^2*(-1 + p1^2 + 2*p1*q1 + q1^2) - 4*p1*p3*q1*q3 + \\
& (-1 + p1^2 + 2*p1*q1 + q1^2)*q3^2)) + \\
& 2*b3*p1*q1*(p2^2*(-1 + p1^2 + 2*p1*q1 + q1^2)*(p3 - q3)^2 + \\
& (-1 + p1^2 + 2*p1*q1 + q1^2)*q2^2*(p3 - q3)^2 - \\
& 2*p2*q2*(p3^2*(-1 + p1^2 + 2*p1*q1 + q1^2) - 2*p3*(p1 + q1)^2*q3 + \\
& (-1 + p1^2 + 2*p1*q1 + q1^2)*q3^2)))^2)/(p1^2*p3^2*q1^2*q3^2) + \\
& (48*b2^2*b3^2*p2*q2*(-(p1^4*(p2^2*(p3 - q3)^2 + q2^2*(p3 - q3)^2 - \\
& 2*p2*q2*(p3^2 + q3^2))) - 2*p1*q1*(p2^2*(p3 - q3)^2 + \\
& q2^2*(p3 - q3)^2 - 2*p2*q2*(p3^2 + q3^2)) - \\
& q1^2*(-1 + q1^2)*(p2^2*(p3 - q3)^2 + q2^2*(p3 - q3)^2 - \\
& 2*p2*q2*(p3^2 + q3^2)) + p1^2*(p2^2*(1 + 2*q1^2)*(p3 - q3)^2 + \\
& (1 + 2*q1^2)*q2^2*(p3 - q3)^2 - 2*p2*q2*(p3^2*(1 + 2*q1^2) - \\
& 8*p3*q1^2*q3 + (1 + 2*q1^2)*q3^2)))/(p1*p3*q1*q3) + \\
& (8*b2^2*p1*p2*p3*q1*q2*q3 + b2*b3*(p1 - q1)* \\
& (p2^2*(-1 + p1^2 + 2*p1*q1 + q1^2)*(p3 - q3)^2 + \\
& (-1 + p1^2 + 2*p1*q1 + q1^2)*q2^2*(p3 - q3)^2 - \\
& 2*p2*q2*(p3^2*(-1 + p1^2 + 2*p1*q1 + q1^2) - 4*p1*p3*q1*q3 + \\
& (-1 + p1^2 + 2*p1*q1 + q1^2)*q3^2)) + \\
& b3^2*(-(p1^4*(p2^2*(p3 - q3)^2 + q2^2*(p3 - q3)^2 - \\
& 2*p2*q2*(p3^2 + q3^2))) - 2*p1*q1*(p2^2*(p3 - q3)^2 + \\
& q2^2*(p3 - q3)^2 - 2*p2*q2*(p3^2 + q3^2)) - q1^2*(-1 + q1^2)* \\
& (p2^2*(p3 - q3)^2 + q2^2*(p3 - q3)^2 - 2*p2*q2*(p3^2 + q3^2)) + \\
& p1^2*(p2^2*(1 + 2*q1^2)*(p3 - q3)^2 + (1 + 2*q1^2)*q2^2*(p3 - q3)^2 - \\
& 2*p2*q2*(p3^2*(1 + 2*q1^2) - 8*p3*q1^2*q3 + (1 + 2*q1^2)*q3^2)))^2/ \\
& (p1^2*p3^2*q1^2*q3^2) + (2*b2*b3*(8*b2*p1*p2*p3*q1*q2*q3 + \\
& b3*(p1 - q1)*(p2^2*(-1 + p1^2 + 2*p1*q1 + q1^2)*(p3 - q3)^2 + \\
& (-1 + p1^2 + 2*p1*q1 + q1^2)*q2^2*(p3 - q3)^2 - \\
& 2*p2*q2*(p3^2*(-1 + p1^2 + 2*p1*q1 + q1^2) - 4*p1*p3*q1*q3 + \\
& (-1 + p1^2 + 2*p1*q1 + q1^2)*q3^2))) * \\
& (b2*(p1 - q1)*(p2^2*(-1 + p1^2 + 2*p1*q1 + q1^2)*(p3 - q3)^2 + \\
& (-1 + p1^2 + 2*p1*q1 + q1^2)*q2^2*(p3 - q3)^2 - \\
& 2*p2*q2*(p3^2*(-1 + p1^2 + 2*p1*q1 + q1^2) - 4*p1*p3*q1*q3 + \\
& (-1 + p1^2 + 2*p1*q1 + q1^2)*q3^2)) + \\
& b3*(2*p1^3*q1*(p2 - q2)^2*(p3 - q3)^2 - \\
& p1^4*(p2^2*(p3 - q3)^2 + q2^2*(p3 - q3)^2 - 2*p2*q2*(p3^2 + q3^2)) - \\
& q1^2*(-1 + q1^2)*(p2^2*(p3 - q3)^2 + q2^2*(p3 - q3)^2 -
\end{aligned}$$

$$\begin{aligned}
& 2^*p2^*q2^*(p3^2 + q3^2)) + 2^*p1^*q1^*(p2^2^*(-2 + q1^2)*(p3 - q3)^2 + \\
& (-2 + q1^2)^*q2^2^*(p3 - q3)^2 - 2^*p2^*q2^*(p3^2^*(-2 + q1^2) - \\
& 2^*p3^*q1^2^*q3 + (-2 + q1^2)^*q3^2)) + \\
& p1^2^*(p2^2^*(1 + 6^*q1^2)*(p3 - q3)^2 + (1 + 6^*q1^2)^*q2^2^*(p3 - q3)^2 - \\
& 2^*p2^*q2^*(p3^2^*(1 + 6^*q1^2) - 16^*p3^*q1^2^*q3 + (1 + 6^*q1^2)^*q3^2)))/ \\
& (p1^2^*p3^2^*q1^2^*q3^2) + 64^*b2^2^*p2^*q2^*\text{sigm}^2 + \\
& (8^*b2^*(8^*b2^*p1^*p2^*p3^*q1^*q2^*q3 + b3^*(p1 - q1)^* \\
& (p2^2^*(-1 + p1^2 + 2^*p1^*q1 + q1^2)*(p3 - q3)^2 + \\
& (-1 + p1^2 + 2^*p1^*q1 + q1^2)^*q2^2^*(p3 - q3)^2 - \\
& 2^*p2^*q2^*(p3^2^*(-1 + p1^2 + 2^*p1^*q1 + q1^2) - 4^*p1^*p3^*q1^*q3 + \\
& (-1 + p1^2 + 2^*p1^*q1 + q1^2)^*q3^2)))*\text{sigm}^2)/(p1^*p3^*q1^*q3) + \\
& (8^*b3^*(b2^*(p1 - q1)^*(p2^2^*(-1 + p1^2 + 2^*p1^*q1 + q1^2)*(p3 - q3)^2 + \\
& (-1 + p1^2 + 2^*p1^*q1 + q1^2)^*q2^2^*(p3 - q3)^2 - \\
& 2^*p2^*q2^*(p3^2^*(-1 + p1^2 + 2^*p1^*q1 + q1^2) - 4^*p1^*p3^*q1^*q3 + \\
& (-1 + p1^2 + 2^*p1^*q1 + q1^2)^*q3^2)) + \\
& 2^*b3^*p1^*q1^*(p2^2^*(-1 + p1^2 + 2^*p1^*q1 + q1^2)*(p3 - q3)^2 + \\
& (-1 + p1^2 + 2^*p1^*q1 + q1^2)^*q2^2^*(p3 - q3)^2 - \\
& 2^*p2^*q2^*(p3^2^*(-1 + p1^2 + 2^*p1^*q1 + q1^2) - 2^*p3^*(p1 + q1)^2^*q3 + \\
& (-1 + p1^2 + 2^*p1^*q1 + q1^2)^*q3^2)))*\text{sigm}^2)/(p1^*p3^*q1^*q3) + \\
& (8^*b3^2^*(-(p1^4^*(p2^2^*(p3 - q3)^2 + q2^2^*(p3 - q3)^2 - \\
& 2^*p2^*q2^*(p3^2 + q3^2))) - 2^*p1^*q1^*(p2^2^*(p3 - q3)^2 + \\
& q2^2^*(p3 - q3)^2 - 2^*p2^*q2^*(p3^2 + q3^2)) - \\
& q1^2^*(-1 + q1^2)*(p2^2^*(p3 - q3)^2 + q2^2^*(p3 - q3)^2 - \\
& 2^*p2^*q2^*(p3^2 + q3^2)) + p1^2^*(p2^2^*(1 + 2^*q1^2)*(p3 - q3)^2 + \\
& (1 + 2^*q1^2)^*q2^2^*(p3 - q3)^2 - 2^*p2^*q2^*(p3^2^*(1 + 2^*q1^2) - \\
& 8^*p3^*q1^2^*q3 + (1 + 2^*q1^2)^*q3^2)))*\text{sigm}^2)/(p1^*p3^*q1^*q3) + \\
& 32^*\text{sigm}^4)/(2^*b2^2^*p2^*q2 + 4^*b2^*b3^*p2^*(p1 - q1)^*q2 + \\
& 2^*b3^2^*p2^*(p1^2 + q1^2)^*q2 + \text{sigm}^2)^2
\end{aligned}$$

### 4.3 Parameters for the joint distribution of $(T_{1|3}, T_{2|3}, T_1, T_2)$

$$\begin{aligned}
E(T_{1|3}) &= \mu_{T_{1|3}} = \sqrt{n}h_{1|3} \rightarrow \\
& \text{sqrt}(n)*\text{sqrt}((p1^*q1^*(b1 + b3^*(p2 - q2))^2)/(2^*b2^2^*p2^*q2 + \\
& 4^*b2^*b3^*p2^*(p1 - q1)^*q2 + 2^*b3^2^*p2^*(p1^2 + q1^2)^*q2 + \text{sigm}^2))
\end{aligned}$$

$$\begin{aligned}
Var(T_{1|3}) &= \tau_{T_{1|3}}^2 \rightarrow \\
& (16^*b2^*p1^*p2^*(b2 + b3^*(p1 - q1))^*q1^*(b1 + b3^*(p2 - q2))^2^*q2^*\text{sigm}^2 + \\
& 4^*p1^*q1^*(b1 + b3^*(p2 - q2))^2^*\text{sigm}^4 + \\
& 4^*\text{sigm}^2*(2^*b2^2^*p2^*q2 + 4^*b2^*b3^*p2^*(p1 - q1)^*q2 + \\
& 2^*b3^2^*p2^*(p1^2 + q1^2)^*q2 + \text{sigm}^2)^* \\
& (2^*b3^*p1^*q1^*(b1 + b3^*(p2 - q2))^*(p2 - q2) + 2^*b2^2^*p2^*q2 + \\
& 4^*b2^*b3^*p2^*(p1 - q1)^*q2 + 2^*b3^2^*p2^*(p1^2 + q1^2)^*q2 + \text{sigm}^2) + \\
& 8^*b3^*p1^*q1^*(b1 + b3^*(p2 - q2))^*\text{sigm}^2^* \\
& (2^*b1^*p2^*(b2^*(p1 - q1) + b3^*(p1^2 + q1^2))^*q2 - \\
& (p2 - q2)^*(2^*b2^2^*p2^*q2 + 2^*b2^*b3^*p2^*(p1 - q1)^*q2 + \text{sigm}^2)) - \\
& 2^*(b1 + b3^*(p2 - q2))^*(2^*b2^2^*p2^*(p1 - q1)^*q2 + 4^*b2^*b3^*p2^*(p1^2 + q1^2)^* \\
& q2 + (p1 - q1)^*(2^*b3^2^*p2^*(p1 + q1)^2^*q2 + \text{sigm}^2))^* \\
& (-2^*b2^*b3^*p1^*q1^*(b1 + b3^*(p2 - q2))^*(p2 - q2)^2 - \\
& (b1^*(p1 - q1) + b2^*(p2 - q2))^*(2^*b2^2^*p2^*q2 + 4^*b2^*b3^*p2^*(p1 - q1)^*q2 + \\
& 2^*b3^2^*p2^*(p1^2 + q1^2)^*q2 + \text{sigm}^2)) - \\
& (4^*b2^*b3^*p2^*(p1 - q1)^3^*q2 + 2^*b3^2^*p2^*(p1 - q1)^2^*(p1^2 + q1^2)^*q2 + \\
& 2^*b2^2^*p2^*(p1^2 - 4^*p1^*q1 + q1^2)^*q2 + (p1^2 - 4^*p1^*q1 + q1^2)^*\text{sigm}^2)^* \\
& (-2^*b3^2^*p1^*q1^*(b1 + b3^*(p2 - q2))^2^*(p2 - q2)^2 +
\end{aligned}$$

$$\begin{aligned}
& (b1^2 - b3^2*(p2 - q2)^2)*(2*b2^2*p2*q2 + 4*b2*b3*p2*(p1 - q1)*q2 + \\
& 2*b3^2*p2*(p1^2 + q1^2)*q2 + \text{sigm}^2)) + \\
& 4*b2*p2*q2*(2*b2*p1*q1*(b1 + b3*(p2 - q2))*(p2 - q2) - \\
& (p1 - q1)*(2*b2^2*p2*q2 + 4*b2*b3*p2*(p1 - q1)*q2 + \\
& 2*b3^2*p2*(p1^2 + q1^2)*q2 + \text{sigm}^2))* \\
& (b1*(b2^2 + 2*b2*b3*(p1 - q1) + b3^2*(p1^2 + q1^2))*(p2 - q2) + \\
& b3*(b2^2*(p2 + q2)^2 + 2*b2*b3*(p1 - q1)*(p2 + q2)^2 + \\
& b3^2*(p1^2 + q1^2)*(p2 + q2)^2 + 2*\text{sigm}^2)) - \\
& 4*b2^2*p1*p2*q1*(b1 + b3*(p2 - q2))*q2* \\
& (b1*(b2^2 + 2*b2*b3*(p1 - q1) + b3^2*(p1^2 + q1^2))* \\
& (p2^2 - 4*p2*q2 + q2^2) + b3*(p2 - q2)*(b2^2*(p2^2 + q2^2) + \\
& 2*b2*b3*(p1 - q1)*(p2^2 + q2^2) + b3^2*(p1^2 + q1^2)*(p2^2 + q2^2) + \\
& 2*\text{sigm}^2)) - (2*(4*b2*b3*p1*q1*(b1 + b3*(p2 - q2))*(p2 - q2) + \\
& (b2 + b3*(-p1 + q1))*(2*b2^2*p2*q2 + 4*b2*b3*p2*(p1 - q1)*q2 + \\
& 2*b3^2*p2*(p1^2 + q1^2)*q2 + \text{sigm}^2))* \\
& (b3^3*(p1 - q1)*(p1^3*q1*(p2^2 - q2^2)^2 + 2*p1^4*p2*q2*(p2^2 + q2^2) + \\
& 2*p2*q1^2*(-1 + q1^2)*q2*(p2^2 + q2^2) + p1*q1*(p2 - q2)^2* \\
& (1 + p2^2*(-2 + q1^2) + 2*p2*q1^2*q2 + (-2 + q1^2)*q2^2) + \\
& 2*p1^2*(p2^4*q1^2 + 6*p2^2*q1^2*q2^2 - p2*(1 + 2*q1^2)*q2^3 + \\
& q1^2*q2^4 - p2^3*(q2 + 2*q1^2*q2))) + \\
& 2*b2*b3^2*(2*p1^4*p2*q2*(p2^2 + q2^2) + 2*p2*q1^2*(-1 + q1^2)*q2* \\
& (p2^2 + q2^2) - 2*p1^2*p2*q2*(p2^2*(1 + 2*q1^2) - 8*p2*q1^2*q2 + \\
& (1 + 2*q1^2)*q2^2) - p1^3*q1*(p2^4 + 2*p2*q2 + q2^2*(-1 + q2^2) + \\
& p2^2*(-1 + 10*q2^2)) + p1*(-(p2^4*q1^3) + 4*p2^3*q1*q2 + \\
& p2^2*q1^3*(1 - 10*q2^2) - q1^3*q2^2*(-1 + q2^2) + \\
& p2*(-2*q1^3*q2 + 4*q1*q2^3))) - 4*b2*p1*p2*q1*q2* \\
& (2*b2^2*p2*q2 + \text{sigm}^2) + b1*p1*q1*(p2 - q2)* \\
& (-2*b2*b3*(p1^2 + q1^2)*(-1 + p2^2 + 2*p2*q2 + q2^2) + \\
& b3^2*(p1 - q1)*(1 + p2^2*(-2 + p1^2 + 2*p1*q1 + q1^2) - \\
& 2*p2*(p1 + q1)^2*q2 + (-2 + p1^2 + 2*p1*q1 + q1^2)*q2^2) + \\
& (p1 - q1)*\text{sigm}^2) + b3*(p1 - q1)* \\
& (2*b2^2*p2*q2*(p2^2*(-1 + p1^2 + 2*p1*q1 + q1^2) - 12*p1*p2*q1*q2 + \\
& (-1 + p1^2 + 2*p1*q1 + q1^2)*q2^2) + \\
& (p2^2*(-1 + p1^2 + 3*p1*q1 + q1^2) - 6*p1*p2*q1*q2 + \\
& (-1 + p1^2 + 3*p1*q1 + q1^2)*q2^2)*\text{sigm}^2)))/(p1*q1) + \\
& (2*b3*(2*b3*p1*q1*(b1 + b3*(p2 - q2))*(p2 - q2) + 2*b2^2*p2*q2 + \\
& 4*b2*b3*p2*(p1 - q1)*q2 + 2*b3^2*p2*(p1^2 + q1^2)*q2 + \text{sigm}^2)* \\
& (-2*b2^2*p1*p2*q1*(p1^2 + q1^2)*(b1 + b3*(p2 - q2))^2*(p2 - q2)*q2 + \\
& 2*b2*b3*p1*(p1 - q1)*q1*(b1 + b3*(p2 - q2))^2*(p2 - q2)* \\
& (-1 + p2^2*q1^2 + q1^2*q2^2 + p1^2*(p2^2 + q2^2)) + \\
& b3^2*p1*q1*(p1^2 + q1^2)*(b1 + b3*(p2 - q2))^2*(p2 - q2)* \\
& (-1 + p2^2*q1^2 + q1^2*q2^2 + p1^2*(p2^2 + q2^2)) + \\
& b3*(p1^2 + q1^2)*(b1 + b3*(p2 - q2))*(p2^2 - (p1^2 + q1^2)*(p2 - q2)^2 + \\
& q2^2)*(2*b3*p1*q1*(b1 + b3*(p2 - q2))*(p2 - q2) + 2*b2^2*p2*q2 + \\
& 4*b2*b3*p2*(p1 - q1)*q2 + 2*b3^2*p2*(p1^2 + q1^2)*q2 + \text{sigm}^2) + \\
& 2*b2*p2*(p1^2 + q1^2)*(b1 + b3*(p2 - q2))*q2* \\
& (2*b2*p1*q1*(b1 + b3*(p2 - q2))*(p2 - q2) - \\
& (p1 - q1)*(2*b2^2*p2*q2 + 4*b2*b3*p2*(p1 - q1)*q2 + \\
& 2*b3^2*p2*(p1^2 + q1^2)*q2 + \text{sigm}^2)) + \\
& (p1 - q1)*(b1 + b3*(p2 - q2))*(p2^2 - (p1^2 + q1^2)*(p2 - q2)^2 + q2^2)* \\
& (4*b2*b3*p1*q1*(b1 + b3*(p2 - q2))*(p2 - q2) + (b2 + b3*(-p1 + q1))* \\
& (2*b2^2*p2*q2 + 4*b2*b3*p2*(p1 - q1)*q2 + 2*b3^2*p2*(p1^2 + q1^2)* \\
& q2 + \text{sigm}^2)) + 2*p1*(p1 - q1)*q1*(b1 + b3*(p2 - q2))*(p2 - q2)* \\
& (-2*b2*b3*p1*q1*(b1 + b3*(p2 - q2))*(p2 - q2)^2 - \\
& (b1*(p1 - q1) + b2*(p2 - q2))*(2*b2^2*p2*q2 + 4*b2*b3*p2*(p1 - q1)* \\
& q2 + 2*b3^2*p2*(p1^2 + q1^2)*q2 + \text{sigm}^2)) +
\end{aligned}$$



$$\begin{aligned}
& p1^*q1^*(p1^2 + q1^2)^*(p2 - q2)^*(-2*b3^2*p1^*q1^*(b1 + b3^*(p2 - q2))^2* \\
& (p2 - q2)^2 + (b1^2 - b3^2*(p2 - q2)^2)^*(2*b2^2*p2^*q2 + \\
& 4*b2*b3^2*p2^*(p1 - q1)*q2 + 2*b3^2*p2^*(p1^2 + q1^2)*q2 + \text{sigm}^2)))/ \\
& (p1^*q1^*(b1 + b3^*(p2 - q2))) - \\
& 4*b2*b3^2*(-2*b2^2*p1^*p2^*(p1 - q1)*q1^*(b1 + b3^*(p2 - q2))^2*q2^* \\
& (p2^2 + q2^2) + b3^2*p1^*(p1 - q1)*q1^*(b1 + b3^*(p2 - q2))^2*(p2^2 + q2^2)* \\
& (-1 + p2^2*q1^2 + q1^2*q2^2 + p1^2*(p2^2 + q2^2)) + \\
& 2*b2*b3^2*p1^*q1^*(b1 + b3^*(p2 - q2))^2*(p2^2 + q2^2)* \\
& (p1^2*(-1 + p2^2 + q2^2) + q1^2*(-1 + p2^2 + q2^2) - \\
& 2*p1^*q1^*(p2^2 + q2^2)) + b3^2*(p1 - q1)^*(b1 + b3^*(p2 - q2))^*(p2 - q2)* \\
& (1 - (p1^2 + q1^2)^*(p2^2 + q2^2))^*(2*b3^2*p1^*q1^*(b1 + b3^*(p2 - q2))^* \\
& (p2 - q2) + 2*b2^2*p2^*q2 + 4*b2*b3^2*p2^*(p1 - q1)*q2 + \\
& 2*b3^2*p2^*(p1^2 + q1^2)*q2 + \text{sigm}^2) + 2*b2^2*p2^*(p1 - q1)* \\
& (b1 + b3^*(p2 - q2))^*(p2 - q2)*q2^*(2*b2^2*p1^*q1^*(b1 + b3^*(p2 - q2))^* \\
& (p2 - q2) - (p1 - q1)^*(2*b2^2*p2^*q2 + 4*b2*b3^2*p2^*(p1 - q1)*q2 + \\
& 2*b3^2*p2^*(p1^2 + q1^2)*q2 + \text{sigm}^2)) + (b1 + b3^*(p2 - q2))^*(p2 - q2)* \\
& (p1^2 + q1^2 - (p1 - q1)^2*(p2^2 + q2^2))^* \\
& (4*b2*b3^2*p1^*q1^*(b1 + b3^*(p2 - q2))^*(p2 - q2) + (b2 + b3^*(-p1 + q1))^* \\
& (2*b2^2*p2^*q2 + 4*b2*b3^2*p2^*(p1 - q1)*q2 + 2*b3^2*p2^*(p1^2 + q1^2)*q2 + \\
& \text{sigm}^2)) + 2*p1^*q1^*(b1 + b3^*(p2 - q2))^*(p2^2 + q2^2)* \\
& (-2*b2*b3^2*p1^*q1^*(b1 + b3^*(p2 - q2))^*(p2 - q2)^2 - \\
& (b1^*(p1 - q1) + b2^*(p2 - q2))^*(2*b2^2*p2^*q2 + 4*b2*b3^2*p2^*(p1 - q1)*q2 + \\
& 2*b3^2*p2^*(p1^2 + q1^2)*q2 + \text{sigm}^2)) + p1^*(p1 - q1)*q1^*(p2^2 + q2^2)* \\
& (-2*b3^2*p1^*q1^*(b1 + b3^*(p2 - q2))^2*(p2 - q2)^2 + \\
& (b1^2 - b3^2*(p2 - q2)^2)^*(2*b2^2*p2^*q2 + 4*b2*b3^2*p2^*(p1 - q1)*q2 + \\
& 2*b3^2*p2^*(p1^2 + q1^2)*q2 + \text{sigm}^2))) - \\
& 2*b3^2*(-2*b2^2*p1^*p2^*q1^*(p1^2 + q1^2)^*(b1 + b3^*(p2 - q2))^2*q2^* \\
& (p2^2 + q2^2) + 2*b2*b3^2*p1^*(p1 - q1)*q1^*(b1 + b3^*(p2 - q2))^2* \\
& (p2^2 + q2^2)^*(-1 + p2^2*q1^2 + q1^2*q2^2 + p1^2*(p2^2 + q2^2)) + \\
& b3^2*p1^*q1^*(p1^2 + q1^2)^*(b1 + b3^*(p2 - q2))^2*(p2^2 + q2^2)* \\
& (-1 + p2^2*q1^2 + q1^2*q2^2 + p1^2*(p2^2 + q2^2)) + \\
& b3^2*(p1^2 + q1^2)^*(b1 + b3^*(p2 - q2))^*(p2 - q2)* \\
& (1 - (p1^2 + q1^2)^*(p2^2 + q2^2))^*(2*b3^2*p1^*q1^*(b1 + b3^*(p2 - q2))^* \\
& (p2 - q2) + 2*b2^2*p2^*q2 + 4*b2*b3^2*p2^*(p1 - q1)*q2 + \\
& 2*b3^2*p2^*(p1^2 + q1^2)*q2 + \text{sigm}^2) + 2*b2^2*p2^*(p1^2 + q1^2)* \\
& (b1 + b3^*(p2 - q2))^*(p2 - q2)*q2^*(2*b2^2*p1^*q1^*(b1 + b3^*(p2 - q2))^* \\
& (p2 - q2) - (p1 - q1)^*(2*b2^2*p2^*q2 + 4*b2*b3^2*p2^*(p1 - q1)*q2 + \\
& 2*b3^2*p2^*(p1^2 + q1^2)*q2 + \text{sigm}^2)) + (p1 - q1)^*(b1 + b3^*(p2 - q2))^* \\
& (p2 - q2)^*(1 - (p1^2 + q1^2)^*(p2^2 + q2^2))^* \\
& (4*b2*b3^2*p1^*q1^*(b1 + b3^*(p2 - q2))^*(p2 - q2) + (b2 + b3^*(-p1 + q1))^* \\
& (2*b2^2*p2^*q2 + 4*b2*b3^2*p2^*(p1 - q1)*q2 + 2*b3^2*p2^*(p1^2 + q1^2)*q2 + \\
& \text{sigm}^2)) + 2*p1^*(p1 - q1)*q1^*(b1 + b3^*(p2 - q2))^*(p2^2 + q2^2)* \\
& (-2*b2*b3^2*p1^*q1^*(b1 + b3^*(p2 - q2))^*(p2 - q2)^2 - \\
& (b1^*(p1 - q1) + b2^*(p2 - q2))^*(2*b2^2*p2^*q2 + 4*b2*b3^2*p2^*(p1 - q1)*q2 + \\
& 2*b3^2*p2^*(p1^2 + q1^2)*q2 + \text{sigm}^2)) + p1^*q1^*(p1^2 + q1^2)* \\
& (p2^2 + q2^2)^*(-2*b3^2*p1^*q1^*(b1 + b3^*(p2 - q2))^2*(p2 - q2)^2 + \\
& (b1^2 - b3^2*(p2 - q2)^2)^*(2*b2^2*p2^*q2 + 4*b2*b3^2*p2^*(p1 - q1)*q2 + \\
& 2*b3^2*p2^*(p1^2 + q1^2)*q2 + \text{sigm}^2)))/ \\
& (8*(2*b2^2*p2^*q2 + 4*b2*b3^2*p2^*(p1 - q1)*q2 + 2*b3^2*p2^*(p1^2 + q1^2)*q2 + \\
& \text{sigm}^2)^3)
\end{aligned}$$

$$\begin{aligned}
Cov(T_1, T_{1|3}) &= \tau_{1|3,1} \xrightarrow{P} [\nabla h_{1|3}(\boldsymbol{\theta})]' \Sigma [\nabla h_1(\boldsymbol{\theta})] = \\
& ((b1 + b3^*(p2 - q2))^*(16*b2^2*p1^2*p2^*(b2 + b3^*(p1 - q1))^*q1^2* \\
& (b1 + b3^*(p2 - q2))^2*q2^*\text{sigm}^2 + 4*p1^2*q1^2*(b1 + b3^*(p2 - q2))^2* \\
& \text{sigm}^4 + 4*p1^*q1^*\text{sigm}^2*(2*p2^*((b2 + b3^*p1)^2 - 2*b2*b3^*q1 + b3^2*q1^2)* \\
& q2 + \text{sigm}^2)^*(2*(b3^2*p1*p2^2*q1 + b1*b3^*p1^*q1^*(p2 - q2) +
\end{aligned}$$

$$\begin{aligned}
& p2^*(b2 + b3*(p1 - q1))^2*q2 + b3^2*p1*q1*q2^2) + \text{sigm}^2) - \\
& 4*b2^2*p1^2*q1^2*((b2 + b3*p1)^2 - 2*b2*b3*q1 + b3^2*q1^2)* \\
& (b1*(p2 - q2) + b3*(p2 + q2)^2) + 2*b3*\text{sigm}^2)* \\
& (-2*b2*b3*p1*p2^2*q1 + 2*p2*(b2 + b3*(p1 - q1))^2* \\
& (b2*(p1 - q1) + b3*(p1^2 + q1^2))*q2 - 2*b2*b3*p1*q1*q2^2 + \\
& 2*b1*b2*p1*q1*(-p2 + q2) + (p1 - q1)*\text{sigm}^2) - \\
& 4*b2^2*p1^2*p2^2*q1^2*(b1 + b3*(p2 - q2))*q2* \\
& (((b2 + b3*p1)^2 - 2*b2*b3*q1 + b3^2*q1^2)*(b3*(p2 - q2)*(p2^2 + q2^2) + \\
& b1*(p2^2 - 4*p2^2*q2 + q2^2)) + 2*b3*(p2 - q2)*\text{sigm}^2) + \\
& 8*b3*p1^2*q1^2*(b1 + b3*(p2 - q2))*\text{sigm}^2* \\
& (2*b1*p2*(b2*(p1 - q1) + b3*(p1^2 + q1^2))*q2 - \\
& (p2 - q2)*(2*b2*p2*(b2 + b3*(p1 - q1))*q2 + \text{sigm}^2)) - \\
& p1*q1*(b1 + b3*(p2 - q2))*(2*p2*(b2 + b3*(p1 - q1))^2* \\
& (b3*(p1 - q1)*(p1^2 + q1^2) + b2*(p1^2 - 4*p1*q1 + q1^2))*q2 + \\
& (p1^2 - 4*p1*q1 + q1^2)*\text{sigm}^2)* \\
& (b1*(2*b2^2*p2^2*q2 + 4*b2*b3*p2*(p1 - q1)*q2 + \\
& 2*b3^2*(-(p1*p2^2*q1) + p2*(p1 + q1)^2*q2 - p1*q1*q2^2) + \text{sigm}^2) - \\
& b3*(p2 - q2)*(2*(b3^2*p1*p2^2*q1 + p2*(b2 + b3*(p1 - q1))^2*q2 + \\
& b3^2*p1*q1*q2^2) + \text{sigm}^2)) + \\
& 2*(4*b2*b3*p1*q1*(b1 + b3*(p2 - q2))*(p2 - q2) + \\
& (b2 + b3*(-p1 + q1))*(2*p2*((b2 + b3*p1)^2 - 2*b2*b3*q1 + b3^2*q1^2)* \\
& q2 + \text{sigm}^2))*(2*b2*b3^2*(p1*p2^2*(-1 + p2^2)*q1*(p1^2 + q1^2) - \\
& 2*p2*(p1^4*p2^2 - p1^3*q1 + p2^2*q1^2*(-1 + q1^2)) - \\
& p1^2*p2^2*(1 + 2*q1^2) + p1*(2*p2^2*q1 - q1^3))*q2 + \\
& p1*q1*(p1^2*(-1 + 10*p2^2) - 16*p1*p2^2*q1 + (-1 + 10*p2^2)*q1^2)* \\
& q2^2 - 2*p2*(p1 - q1)^2*(-1 + p1 + q1)*(1 + p1 + q1)*q2^3 + \\
& p1*q1*(p1^2 + q1^2)*q2^4 - b3^3*(p1 - q1)* \\
& (p1*p2^2*q1*(1 + p2^2*(-2 + (p1 + q1)^2)) + \\
& 2*p2*(p1^4*p2^2 + p1*(-1 + 2*p2^2)*q1 + p2^2*q1^2*(-1 + q1^2) - \\
& p1^2*p2^2*(1 + 2*q1^2))*q2 - \\
& p1*q1*(-1 + 2*p2^2*(2 + p1^2 - 6*p1*q1 + q1^2))*q2^2 + \\
& 2*p2*(p1 - q1)^2*(-1 + p1 + q1)*(1 + p1 + q1)*q2^3 + \\
& p1*q1*(-2 + (p1 + q1)^2)*q2^4) + 4*b2^2*p1*p2^2*q1*q2* \\
& (2*b2^2*p2^2*q2 + \text{sigm}^2) - b1*p1*q1*(p2 - q2)* \\
& (-2*b2*b3*(p1^2 + q1^2)*(-1 + p2 + q2)*(1 + p2 + q2) + \\
& b3^2*(p1 - q1)*(1 + p2^2*(-2 + (p1 + q1)^2) - 2*p2*(p1 + q1)^2*q2 + \\
& (-2 + (p1 + q1)^2)*q2^2) + (p1 - q1)*\text{sigm}^2) - \\
& b3*(p1 - q1)*(2*b2^2*p2^2*q2*(p2^2*(-1 + p1 + q1)*(1 + p1 + q1) - \\
& 12*p1*p2^2*q1*q2 + (-1 + p1 + q1)*(1 + p1 + q1)*q2^2) + \\
& (p2^2*(-1 + p1^2 + 3*p1*q1 + q1^2) - 6*p1*p2^2*q1*q2 + \\
& (-1 + p1^2 + 3*p1*q1 + q1^2)*q2^2)*\text{sigm}^2)) + \\
& 2*b3*(2*(b3^2*p1*p2^2*q1 + b1*b3*p1*q1*(p2 - q2) + \\
& p2*(b2 + b3*(p1 - q1))^2*q2 + b3^2*p1*q1*q2^2) + \text{sigm}^2)* \\
& (-2*b2^3*p2*(p1 - q1)*q2*(p2^2*(-1 + p1 + q1)*(1 + p1 + q1) - \\
& 4*p1*p2^2*q1*q2 + (-1 + p1 + q1)*(1 + p1 + q1)*q2^2) - \\
& 4*b2^2*b3*p2^2*q2*(p2^2*(p1^4 + p1^3*q1 - q1^2 + q1^4 - \\
& p1^2*(1 + 2*q1^2) + p1*(q1 + q1^3)) - \\
& 2*p1*p2^2*q1*(3*p1^2 - 4*p1*q1 + 3*q1^2)*q2 + \\
& (p1^4 + p1^3*q1 - q1^2 + q1^4 - p1^2*(1 + 2*q1^2) + p1*(q1 + q1^3))* \\
& q2^2) - b1*p1*q1*(p2 - q2)*(-8*b2^2*p1*p2^2*q1*q2 + \\
& 2*b2*b3*(p1 - q1)*(1 + p2^2*(-2 + (p1 + q1)^2) - \\
& 2*p2*(p1^2 + 6*p1*q1 + q1^2)*q2 + (-2 + (p1 + q1)^2)*q2^2) + \\
& b3^2*(p1^2 + q1^2)*(1 + p2^2*(-2 + (p1 + q1)^2) - \\
& 2*p2*(p1^2 + 6*p1*q1 + q1^2)*q2 + (-2 + (p1 + q1)^2)*q2^2) + \\
& (p1^2 - 4*p1*q1 + q1^2)*\text{sigm}^2) - b2*(p1 - q1)* \\
& (2*b3^2*(p1*p2^2*q1*(1 + p2^2*(-2 + (p1 + q1)^2)) +
\end{aligned}$$

$$\begin{aligned}
& p2^*(p1^2*(-1 + p1^2)*p2^2 + 2*p1*(-1 + p1^2*p2^2)*q1 - \\
& (1 + 6*p1^2)*p2^2*q1^2 + 2*p1*p2^2*q1^3 + p2^2*q1^4)*q2 - \\
& p1*(-1 + 2*p2^2*(2 + 3*(p1 - q1)^2))*q1*q2^2 + \\
& p2^*(p1^4 + 2*p1^3*q1 - q1^2 + 2*p1*q1^3 + q1^4 - p1^2*(1 + 6*q1^2))* \\
& q2^3 + p1*q1*(-2 + (p1 + q1)^2)*q2^4 + \\
& (p2^2*(-1 + p1 + q1)*(1 + p1 + q1) - 4*p1*p2*q1*q2 + \\
& (-1 + p1 + q1)*(1 + p1 + q1)*q2^2)*\text{sigm}^2) - \\
& b3*p1*q1*(b3^2*(p1^2 + q1^2)*(p2^4*(-2 + (p1 + q1)^2) - \\
& 8*p1*p2^3*q1*q2 + q2^2 + (-2 + (p1 + q1)^2)*q2^4 + \\
& p2^2*(1 - 2*(2 + p1^2 - 6*p1*q1 + q1^2)*q2^2) - \\
& 2*p2*(q2 + 4*p1*q1*q2^3)) + (p2^2*(-2 + 3*p1^2 + 3*q1^2) - \\
& 6*p2*(p1^2 + q1^2)*q2 + (-2 + 3*p1^2 + 3*q1^2)*q2^2)*\text{sigm}^2)) + \\
& 2*p1*q1*(b1 + b3*(p2 - q2))*(2*p2*(b2 + b3*(p1 - q1))* \\
& (b2*(p1 - q1) + b3*(p1 + q1)^2)*q2 + (p1 - q1)*\text{sigm}^2)* \\
& (b2*(p2 - q2)*(2*(b3^2*p1*p2^2*q1 + p2*(b2 + b3*(p1 - q1))^2*q2 + \\
& b3^2*p1*q1*q2^2) + \text{sigm}^2) + b1*(2*b2^2*p2*(p1 - q1)*q2 + \\
& 2*b2*b3*(p1*p2^2*q1 + 2*p2*(p1^2 - 3*p1*q1 + q1^2)*q2 + p1*q1*q2^2) + \\
& (p1 - q1)*(2*b3^2*p2*(p1^2 + q1^2)*q2 + \text{sigm}^2))) - \\
& 4*b2*b3*p1*q1*(b1 + b3*(p2 - q2))* \\
& (b1*p1*q1*(-2*b2*b3*(p1^2 + q1^2)*(p2^4 - 2*p2^3*q2 - q2^2 + q2^4 - \\
& 2*p2*q2^2*(-2 + q2^2) + p2^2*(-1 + 2*q2^2)) + \\
& b3^2*(p1 - q1)*(-(p2^4*(p1 + q1)^2) + 2*p2^3*(p1 + q1)^2*q2 + q2^2 - \\
& (p1 + q1)^2*q2^4 + p2^2*(1 - 2*(p1 + q1)^2*q2^2) + \\
& 2*p2*q2^2*(-2 + (p1 + q1)^2*q2^2)) - (p1 - q1)*(8*b2^2*p2^2*q2^2 + \\
& (p2^2 + q2^2)*\text{sigm}^2)) - (p2 - q2)* \\
& (b3^3*(p1 - q1)*(p1*p2^2*q1*(-1 + p2*(p1 + q1))*(1 + p2*(p1 + q1)) + \\
& 2*p2*(p1^4 + p1^3*p2^2*q1 - q1^2 + q1^4 + p1*q1*(2 + p2^2*q1^2) + \\
& p1^2*(-1 - 2*(-1 + p2^2)*q1^2))*q2 + \\
& p1*q1*(-1 + 2*p2^2*(p1 + q1)^2)*q2^2 + 2*p1*p2*(p1 - q1)^2*q1*q2^3 + \\
& p1*q1*(p1 + q1)^2*q2^4) + 2*b2*b3^2*(p1*p2^2*(-1 + p2^2)*q1* \\
& (p1^2 + q1^2) + p2*(p1^4*(1 + p2^2) + 2*p1^3*p2^2*q1 - 2*q1^2 + \\
& (1 + p2^2)*q1^4 + 2*p1*q1*(2 + p2^2*q1^2) + \\
& p1^2*(-2 + (2 - 6*p2^2)*q1^2))*q2 + (p1^2 + q1^2)* \\
& (2*p1^2*p2^2 + 2*p2^2*q1^2 - p1*(q1 + 2*p2^2*q1))*q2^2 + \\
& p2*(p1 - q1)^2*(p1^2 + 4*p1*q1 + q1^2)*q2^3 + p1*q1*(p1^2 + q1^2)* \\
& q2^4) + b2*(-4*p1*p2*q1*q2 + p1^2*(-1 + p2 + q2)*(1 + p2 + q2) + \\
& q1^2*(-1 + p2 + q2)*(1 + p2 + q2))*(2*b2^2*p2*q2 + \text{sigm}^2) + \\
& b3*(p1 - q1)*(2*b2^2*p2*q2*(-1 + 2*p1*q1*(p2 - q2)^2 + \\
& p1^2*(-1 + 2*(p2 + q2)^2) + q1^2*(-1 + 2*(p2 + q2)^2)) + \\
& (-1 + p1^2 + q1^2 + 3*p1*q1*(p2^2 + q2^2))*\text{sigm}^2)) + \\
& 2*b3^2*p1*q1*(b1 + b3*(p2 - q2))* \\
& (b1*p1*q1*(8*b2^2*p2*q2*(-(p2*q1) + p1*q2)*(p1*p2 - q1*q2) + \\
& 2*b2*b3*(p1 - q1)*(p2^4*(p1 + q1)^2 + 4*p2*q2 - \\
& 2*p2^3*(p1^2 + 6*p1*q1 + q1^2)*q2 - q2^2 - \\
& 2*p2*(p1^2 + 6*p1*q1 + q1^2)*q2^3 + (p1 + q1)^2*q2^4 + \\
& p2^2*(-1 + 2*(p1 + q1)^2*q2^2)) + b3^2*(p1^2 + q1^2)* \\
& (p2^4*(p1 + q1)^2 + 4*p2^2*q2 - 2*p2^3*(p1^2 + 6*p1*q1 + q1^2)*q2 - \\
& q2^2 - 2*p2*(p1^2 + 6*p1*q1 + q1^2)*q2^3 + (p1 + q1)^2*q2^4 + \\
& p2^2*(-1 + 2*(p1 + q1)^2*q2^2)) + (p1^2 - 4*p1*q1 + q1^2)* \\
& (p2^2 + q2^2)*\text{sigm}^2) + (p2 - q2)* \\
& (2*b2^3*p2*(p1 - q1)*q2*(-1 + p1^2*(p2 + q2)^2 + q1^2*(p2 + q2)^2 + \\
& 2*p1*q1*(p2^2 + q2^2)) + 4*b2^2*b3*p2*q2* \\
& (-p1^2*(1 + 2*q1^2*(p2 - q2)^2)) + p1*(q1 + q1^3*(p2 - q2)^2) + \\
& p1^3*q1*(p2 - q2)^2 + p1^4*(p2 + q2)^2 + q1^2*(-1 + q1*(p2 + q2))* \\
& (1 + q1*(p2 + q2))) + b2*(p1 - q1)* \\
& (2*b3^2*(p1^4*p2*q2*(p2 + q2)^2 + p1^3*q1*(p2^2 + q2^2))*
\end{aligned}$$

$$\begin{aligned}
& (p^2 + 4p^2q^2 + q^2) + p^2q^2(-1 + q^2(p^2 + q^2))^* \\
& (1 + q^2(p^2 + q^2)) + p^2q^2(p^2 + q^2)^* \\
& (-1 + q^2(p^2 + 4p^2q^2 + q^2)) + \\
& p^2(2p^2q^4 - 2p^2q^3q^2 + 8p^2q^2q^2 + \\
& 2q^2q^2 - p^2(q^2 + 2q^2q^3)) + \\
& (-1 + p^2(p^2 + q^2)^2 + 2p^2(p^2 + q^2)q^2 + (p^2 + q^2)^2q^2)^* \\
& \text{sig}^2 + b^3p^2q^2(-2\text{sig}^2 + (p^2 + q^2)(p^2 + q^2)^* \\
& (b^3(-1 + p^2(p^2 + q^2)^2 + 2p^2(p^2 - q^2)^2q^2 + \\
& (p^2 + q^2)^2q^2) + 3\text{sig}^2))))/ \\
& (4\sqrt{B})\sqrt{(p^2q^2(b^2 + b^3(p^2 - q^2))^2)/} \\
& (2p^2((b^2 + b^3p^2)^2 - 2b^2b^3q^2 + b^3q^2)^2q^2 + \text{sig}^2))^* \\
& (2p^2((b^2 + b^3p^2)^2 - 2b^2b^3q^2 + b^3q^2)^2q^2 + \text{sig}^2)^3* \\
& \sqrt{p^2q^2(2p^2((b^2 + b^3p^2)^2 - 2b^2b^3q^2 + b^3q^2)^2q^2 + \text{sig}^2))}
\end{aligned}$$

$$\begin{aligned}
Cov(T_{2|3}, T_{1|3}) &= \tau_{1|3,2|3} \xrightarrow{P} [\nabla h_{1|3}(\boldsymbol{\theta})]' \Sigma [\nabla h_{2|3}(\boldsymbol{\theta})] = \\
& (2p^2p^2(b^2 + b^3(p^2 - q^2))^2q^2(b^2 + b^3(p^2 - q^2))^2q^2\text{sig}^4 - \\
& 4b^3p^2p^2(b^2 + b^3(p^2 - q^2))^2q^2(b^2 + b^3(p^2 - q^2))^2q^2\text{sig}^2* \\
& (2b^2p^2q^2 + 4b^2b^3p^2(p^2 - q^2)q^2 + 2b^3p^2(p^2 + q^2)q^2 + \\
& \text{sig}^2) - 4p^2p^2(b^2 + b^3(p^2 - q^2))^2q^2(b^2 + b^3(p^2 - q^2))^2q^2* \\
& \text{sig}^2(2b^2p^2q^2 + 4b^2b^3p^2q^2 + 2b^3p^2(p^2 - q^2)q^2 + \\
& 2b^3p^2(p^2 + q^2)q^2 + \text{sig}^2) + \\
& b^2p^2p^2(b^2 + b^3(p^2 - q^2))^2q^2(b^2 + b^3(p^2 - q^2))^2q^2* \\
& (4b^2b^3p^2(p^2 - q^2)^3q^2 + 2b^3p^2(p^2 - q^2)^2(p^2 + q^2)q^2 + \\
& 2b^2p^2(p^2 - 4p^2q^2 + q^2)q^2 + (p^2 - 4p^2q^2 + q^2)\text{sig}^2) + \\
& 4b^3p^2p^2(b^2 + b^3(p^2 - q^2))^2q^2(b^2 + b^3(p^2 - q^2))^2q^2\text{sig}^2* \\
& (2b^2p^2(b^2(p^2 - q^2) + b^3(p^2 + q^2))q^2 - \\
& (p^2 - q^2)(2b^2p^2q^2 + 2b^2b^3p^2(p^2 - q^2)q^2 + \text{sig}^2)) + \\
& b^2p^2(b^2 + b^3(p^2 - q^2))q^2(b^2 + b^3(p^2 - q^2))^2* \\
& (2b^2p^2(p^2 - q^2)q^2 + 4b^2b^3p^2(p^2 + q^2)q^2 + \\
& (p^2 - q^2)(2b^3p^2(p^2 + q^2)q^2 + \text{sig}^2))^* \\
& (2b^2p^2q^2 - 2b^2(b^2p^2(p^2 - q^2)q^2 + \\
& b^3(p^2 + q^2)q^2 + p^2q^2 - 2p^2q^2 + q^2)) + \\
& (p^2 - q^2)(2b^3p^2q^2 + \text{sig}^2)) + \\
& 2p^2p^2(b^2 + b^3(p^2 - q^2))q^2(b^2 + b^3(p^2 - q^2))q^2* \\
& (-2b^2b^3p^2(b^2 + b^3(p^2 - q^2))(p^2 - q^2)q^2 - \\
& (b^2(p^2 - q^2) + b^3(p^2 + q^2))(2b^2p^2q^2 + 4b^2b^3p^2q^2 + \\
& 2b^3p^2q^2 + \text{sig}^2))^* \\
& (b^2(b^2 + 2b^2b^3(p^2 - q^2) + b^3(p^2 + q^2))(p^2 - q^2) + \\
& b^3(b^2 + q^2)^2 + 2b^2b^3(p^2 - q^2)(p^2 + q^2)^2 + \\
& b^3(p^2 + q^2)(p^2 + q^2)^2 + 2\text{sig}^2)) + \\
& p^2p^2q^2(b^2 + b^3(p^2 - q^2))q^2(-2b^3p^2(b^2 + b^3(p^2 - q^2))^2* \\
& (p^2 - q^2)q^2 + (b^2 - b^3(p^2 - q^2))^2(2b^2p^2q^2 + \\
& 4b^2b^3p^2q^2 + 2b^3p^2q^2 + \text{sig}^2))^* \\
& (b^2(b^2 + 2b^2b^3(p^2 - q^2) + b^3(p^2 + q^2))^* \\
& (p^2 - 4p^2q^2 + q^2) + b^3(p^2 - q^2)(b^2 + q^2) + \\
& 2b^2b^3(p^2 - q^2)(p^2 + q^2) + b^3(p^2 + q^2)(p^2 + q^2) + \\
& 2\text{sig}^2)) - (b^2 + b^3(p^2 - q^2))(b^2 + b^3(p^2 - q^2))^* \\
& (4b^2b^3p^2(b^2 + b^3(p^2 - q^2))(p^2 - q^2)q^2 + \\
& (b^2 + b^3(p^2 - q^2))(2b^2p^2q^2 + 4b^2b^3p^2q^2 + \\
& 2b^3p^2q^2 + \text{sig}^2))^* \\
& (b^3p^2(p^2 - q^2)(p^2 + q^2)q^2 + 2p^2p^2q^2(p^2 + q^2) + \\
& 2p^2q^2(-1 + q^2)q^2(p^2 + q^2) + p^2q^2(p^2 - q^2)^2* \\
& (1 + p^2(-2 + q^2) + 2p^2q^2 + (-2 + q^2)q^2) + \\
& 2p^2(p^2 - 4p^2q^2 + 6p^2q^2 - p^2(1 + 2q^2)q^2 + \\
& q^2q^2 - p^2(3q^2 + 2q^2q^3)) + \\
& 2b^2b^3p^2(2p^2p^2q^2(p^2 + q^2) + 2p^2q^2(-1 + q^2)q^2)
\end{aligned}$$

$$\begin{aligned}
& (p2^2 + q2^2) - 2*p1^2*p2*q2*(p2^2*(1 + 2*q1^2) - 8*p2*q1^2*q2 + \\
& (1 + 2*q1^2)*q2^2) - p1^3*q1*(p2^4 + 2*p2*q2 + q2^2*(-1 + q2^2) + \\
& p2^2*(-1 + 10*q2^2)) + p1*(-(p2^4*q1^3) + 4*p2^3*q1*q2 + \\
& p2^2*q1^3*(1 - 10*q2^2) - q1^3*q2^2*(-1 + q2^2) + \\
& p2*(-2*q1^3*q2 + 4*q1*q2^3))) - 4*b2*p1*p2*q1*q2* \\
& (2*b2^2*p2*q2 + \text{sigm}^2) + b1*p1*q1*(p2 - q2)* \\
& (-2*b2*b3*(p1^2 + q1^2)*(-1 + p2^2 + 2*p2*q2 + q2^2) + \\
& b3^2*(p1 - q1)*(1 + p2^2*(-2 + p1^2 + 2*p1*q1 + q1^2) - \\
& 2*p2*(p1 + q1)^2*q2 + (-2 + p1^2 + 2*p1*q1 + q1^2)*q2^2) + \\
& (p1 - q1)*\text{sigm}^2) + b3*(p1 - q1)* \\
& (2*b2^2*p2*q2*(p2^2*(-1 + p1^2 + 2*p1*q1 + q1^2) - 12*p1*p2*q1*q2 + \\
& (-1 + p1^2 + 2*p1*q1 + q1^2)*q2^2) + \\
& (p2^2*(-1 + p1^2 + 3*p1*q1 + q1^2) - 6*p1*p2*q1*q2 + \\
& (-1 + p1^2 + 3*p1*q1 + q1^2)*q2^2)*\text{sigm}^2)) - \\
& 2*b1*b3*p2*(b2 + b3*(p1 - q1))^2*q2* \\
& (-2*b2^2*p1*p2*q1*(p1^2 + q1^2)*(b1 + b3*(p2 - q2))^2*(p2 - q2)*q2 + \\
& 2*b2*b3*p1*(p1 - q1)*q1*(b1 + b3*(p2 - q2))^2*(p2 - q2)* \\
& (-1 + p2^2*q1^2 + q1^2*q2^2 + p1^2*(p2^2 + q2^2)) + \\
& b3^2*p1*q1*(p1^2 + q1^2)*(b1 + b3*(p2 - q2))^2*(p2 - q2)* \\
& (-1 + p2^2*q1^2 + q1^2*q2^2 + p1^2*(p2^2 + q2^2)) + \\
& b3*(p1^2 + q1^2)*(b1 + b3*(p2 - q2))*(p2^2 - (p1^2 + q1^2)*(p2 - q2)^2 + \\
& q2^2)*(2*b3*p1*q1*(b1 + b3*(p2 - q2))*(p2 - q2) + 2*b2^2*p2*q2 + \\
& 4*b2*b3*p2*(p1 - q1)*q2 + 2*b3^2*p2*(p1^2 + q1^2)*q2 + \text{sigm}^2) + \\
& 2*b2*p2*(p1^2 + q1^2)*(b1 + b3*(p2 - q2))*q2* \\
& (2*b2*p1*q1*(b1 + b3*(p2 - q2))*(p2 - q2) - \\
& (p1 - q1)*(2*b2^2*p2*q2 + 4*b2*b3*p2*(p1 - q1)*q2 + \\
& 2*b3^2*p2*(p1^2 + q1^2)*q2 + \text{sigm}^2)) + (p1 - q1)*(b1 + b3*(p2 - q2))* \\
& (p2^2 - (p1^2 + q1^2)*(p2 - q2)^2 + q2^2)* \\
& (4*b2*b3*p1*q1*(b1 + b3*(p2 - q2))*(p2 - q2) + (b2 + b3*(-p1 + q1))* \\
& (2*b2^2*p2*q2 + 4*b2*b3*p2*(p1 - q1)*q2 + 2*b3^2*p2*(p1^2 + q1^2)*q2 + \\
& \text{sigm}^2)) + 2*p1*(p1 - q1)*q1*(b1 + b3*(p2 - q2))*(p2 - q2)* \\
& (-2*b2*b3*p1*q1*(b1 + b3*(p2 - q2))*(p2 - q2)^2 - \\
& (b1*(p1 - q1) + b2*(p2 - q2))*(2*b2^2*p2*q2 + 4*b2*b3*p2*(p1 - q1)*q2 + \\
& 2*b3^2*p2*(p1^2 + q1^2)*q2 + \text{sigm}^2)) + p1*q1*(p1^2 + q1^2)*(p2 - q2)* \\
& (-2*b3^2*p1*q1*(b1 + b3*(p2 - q2))^2*(p2 - q2)^2 + \\
& (b1^2 - b3^2*(p2 - q2)^2)*(2*b2^2*p2*q2 + 4*b2*b3*p2*(p1 - q1)*q2 + \\
& 2*b3^2*p2*(p1^2 + q1^2)*q2 + \text{sigm}^2))) + \\
& b3*(b2 + b3*(p1 - q1))*(2*b1^2*p1*q1 + 4*b1*b3*p1*q1*(p2 - q2) + \\
& 2*b3*p2*(b2 + b3*(p1 - q1))*(p1 - q1)*q2 + 2*b3^2*p1*q1*(p2^2 + q2^2) + \\
& \text{sigm}^2)*(-2*b2^2*p1*p2*(p1 - q1)*q1*(b1 + b3*(p2 - q2))^2*q2* \\
& (p2^2 + q2^2) + b3^2*p1*(p1 - q1)*q1*(b1 + b3*(p2 - q2))^2*(p2^2 + q2^2)* \\
& (-1 + p2^2*q1^2 + q1^2*q2^2 + p1^2*(p2^2 + q2^2)) + \\
& 2*b2*b3*p1*q1*(b1 + b3*(p2 - q2))^2*(p2^2 + q2^2)* \\
& (p1^2*(-1 + p2^2 + q2^2) + q1^2*(-1 + p2^2 + q2^2) - \\
& 2*p1*q1*(p2^2 + q2^2)) + b3*(p1 - q1)*(b1 + b3*(p2 - q2))*(p2 - q2)* \\
& (1 - (p1^2 + q1^2)*(p2^2 + q2^2))*(2*b3*p1*q1*(b1 + b3*(p2 - q2))* \\
& (p2 - q2) + 2*b2^2*p2*q2 + 4*b2*b3*p2*(p1 - q1)*q2 + \\
& 2*b3^2*p2*(p1^2 + q1^2)*q2 + \text{sigm}^2) + 2*b2*p2*(p1 - q1)* \\
& (b1 + b3*(p2 - q2))*(p2 - q2)*q2*(2*b2*p1*q1*(b1 + b3*(p2 - q2))* \\
& (p2 - q2) - (p1 - q1)*(2*b2^2*p2*q2 + 4*b2*b3*p2*(p1 - q1)*q2 + \\
& 2*b3^2*p2*(p1^2 + q1^2)*q2 + \text{sigm}^2)) + (b1 + b3*(p2 - q2))*(p2 - q2)* \\
& (p1^2 + q1^2 - (p1 - q1)^2*(p2^2 + q2^2))* \\
& (4*b2*b3*p1*q1*(b1 + b3*(p2 - q2))*(p2 - q2) + (b2 + b3*(-p1 + q1))* \\
& (2*b2^2*p2*q2 + 4*b2*b3*p2*(p1 - q1)*q2 + 2*b3^2*p2*(p1^2 + q1^2)*q2 + \\
& \text{sigm}^2)) + 2*p1*q1*(b1 + b3*(p2 - q2))*(p2^2 + q2^2)* \\
& (-2*b2*b3*p1*q1*(b1 + b3*(p2 - q2))*(p2 - q2)^2 -
\end{aligned}$$

$$\begin{aligned}
& (b1*(p1 - q1) + b2*(p2 - q2))*(2*b2^2*p2*q2 + 4*b2*b3*p2*(p1 - q1)*q2 + \\
& 2*b3^2*p2*(p1^2 + q1^2)*q2 + \text{sigm}^2)) + p1*(p1 - q1)*q1*(p2^2 + q2^2)* \\
& (-2*b3^2*p1*q1*(b1 + b3*(p2 - q2))^2*(p2 - q2)^2 + \\
& (b1^2 - b3^2*(p2 - q2)^2)*(2*b2^2*p2*q2 + 4*b2*b3*p2*(p1 - q1)*q2 + \\
& 2*b3^2*p2*(p1^2 + q1^2)*q2 + \text{sigm}^2))) - \\
& b3^2*p2*(b2 + b3*(p1 - q1))^2*q2*(-2*b2^2*p1*p2*q1*(p1^2 + q1^2)* \\
& (b1 + b3*(p2 - q2))^2*q2*(p2^2 + q2^2) + 2*b2*b3*p1*(p1 - q1)*q1* \\
& (b1 + b3*(p2 - q2))^2*(p2^2 + q2^2)*(-1 + p2^2*q1^2 + q1^2*q2^2 + \\
& p1^2*(p2^2 + q2^2)) + b3^2*p1*q1*(p1^2 + q1^2)*(b1 + b3*(p2 - q2))^2* \\
& (p2^2 + q2^2)*(-1 + p2^2*q1^2 + q1^2*q2^2 + p1^2*(p2^2 + q2^2)) + \\
& b3*(p1^2 + q1^2)*(b1 + b3*(p2 - q2))*(p2 - q2)* \\
& (1 - (p1^2 + q1^2)*(p2^2 + q2^2))*(2*b3*p1*q1*(b1 + b3*(p2 - q2))* \\
& (p2 - q2) + 2*b2^2*p2*q2 + 4*b2*b3*p2*(p1 - q1)*q2 + \\
& 2*b3^2*p2*(p1^2 + q1^2)*q2 + \text{sigm}^2) + 2*b2*p2*(p1^2 + q1^2)* \\
& (b1 + b3*(p2 - q2))*(p2 - q2)*q2*(2*b2*p1*q1*(b1 + b3*(p2 - q2))* \\
& (p2 - q2) - (p1 - q1)*(2*b2^2*p2*q2 + 4*b2*b3*p2*(p1 - q1)*q2 + \\
& 2*b3^2*p2*(p1^2 + q1^2)*q2 + \text{sigm}^2)) + (p1 - q1)*(b1 + b3*(p2 - q2))* \\
& (p2 - q2)*(1 - (p1^2 + q1^2)*(p2^2 + q2^2))* \\
& (4*b2*b3*p1*q1*(b1 + b3*(p2 - q2))*(p2 - q2) + (b2 + b3*(-p1 + q1))* \\
& (2*b2^2*p2*q2 + 4*b2*b3*p2*(p1 - q1)*q2 + 2*b3^2*p2*(p1^2 + q1^2)*q2 + \\
& \text{sigm}^2)) + 2*p1*(p1 - q1)*q1*(b1 + b3*(p2 - q2))*(p2^2 + q2^2)* \\
& (-2*b2*b3*p1*q1*(b1 + b3*(p2 - q2))*(p2 - q2)^2 - \\
& (b1*(p1 - q1) + b2*(p2 - q2))*(2*b2^2*p2*q2 + 4*b2*b3*p2*(p1 - q1)*q2 + \\
& 2*b3^2*p2*(p1^2 + q1^2)*q2 + \text{sigm}^2)) + p1*q1*(p1^2 + q1^2)* \\
& (p2^2 + q2^2)*(-2*b3^2*p1*q1*(b1 + b3*(p2 - q2))^2*(p2 - q2)^2 + \\
& (b1^2 - b3^2*(p2 - q2)^2)*(2*b2^2*p2*q2 + 4*b2*b3*p2*(p1 - q1)*q2 + \\
& 2*b3^2*p2*(p1^2 + q1^2)*q2 + \text{sigm}^2))))/ \\
& (4*\text{sqrt}((p1*q1*(b1 + b3*(p2 - q2))^2)/(2*b2^2*p2*q2 + \\
& 4*b2*b3*p2*(p1 - q1)*q2 + 2*b3^2*p2*(p1^2 + q1^2)*q2 + \text{sigm}^2))* \\
& (2*b2^2*p2*q2 + 4*b2*b3*p2*(p1 - q1)*q2 + 2*b3^2*p2*(p1^2 + q1^2)*q2 + \\
& \text{sigm}^2)^2*\text{sqrt}((p2*(b2 + b3*(p1 - q1))^2*q2)/ \\
& (2*b1^2*p1*q1 + 4*b1*b3*p1*q1*(p2 - q2) + 2*b3^2*p1*q1*(p2^2 + q2^2) + \\
& \text{sigm}^2))*(2*b1^2*p1*q1 + 4*b1*b3*p1*q1*(p2 - q2) + \\
& 2*b3^2*p1*q1*(p2^2 + q2^2) + \text{sigm}^2)^2)
\end{aligned}$$

$$\begin{aligned}
Cov(T_1, T_2|_3) &= \tau_{2|3,1} \xrightarrow{P} [\nabla h_{2|3}(\boldsymbol{\theta})]' \Sigma [\nabla h_1(\boldsymbol{\theta})] = \\
\text{cov}T_1T_2|_3 &= \\
& (p1*q1*(2*p1*p2*(b2 + b3*(p1 - q1))^2*q1*(b1 + b3*(p2 - q2))*q2*\text{sigm}^4 - \\
& 4*b1*p1*p2*(b2 + b3*(p1 - q1))^2*q1*q2*\text{sigm}^2* \\
& (2*b2^2*p2*q2 + 4*b2*b3*p2*(p1 - q1)*q2 + 2*b3^2*p2*(p1^2 + q1^2)*q2 + \\
& \text{sigm}^2) - 4*p1*p2*(b2 + b3*(p1 - q1))^2*q1*(b1 + b3*(p2 - q2))*q2*\text{sigm}^2* \\
& (2*b1^2*p1*q1 + 4*b1*b3*p1*q1*(p2 - q2) + 2*b2*b3*p2*(p1 - q1)*q2 + \\
& 2*b3^2*(p1*q1*(p2 - q2)^2 + p1^2*p2*q2 + p2*q1^2*q2) + \text{sigm}^2) + \\
& b1^2*p1*p2*(b2 + b3*(p1 - q1))^2*q1*(b1 + b3*(p2 - q2))*q2* \\
& (4*b2*b3*p2*(p1 - q1)^3*q2 + 2*b3^2*p2*(p1 - q1)^2*(p1^2 + q1^2)*q2 + \\
& 2*b2^2*p2*(p1^2 - 4*p1*q1 + q1^2)*q2 + (p1^2 - 4*p1*q1 + q1^2)*\text{sigm}^2) + \\
& 4*b3*p1*p2*(b2 + b3*(p1 - q1))^2*q1*q2*\text{sigm}^2* \\
& (2*b1*p2*(b2*(p1 - q1) + b3*(p1^2 + q1^2))*q2 - \\
& (p2 - q2)*(2*b2^2*p2*q2 + 2*b2*b3*p2*(p1 - q1)*q2 + \text{sigm}^2)) - \\
& b1*p1*(b2 + b3*(p1 - q1))*q1*(b1 + b3*(p2 - q2))* \\
& (2*b2^2*p2*(p1 - q1)*q2 + 4*b2*b3*p2*(p1^2 + q1^2)*q2 + \\
& (p1 - q1)*(2*b3^2*p2*(p1 + q1)^2*q2 + \text{sigm}^2))* \\
& (2*b1*p2*(b2 + b3*(p1 - q1))*(p1 - q1)*q2 - \\
& (p2 - q2)*(2*b1^2*p1*q1 + 4*b1*b3*p1*q1*(p2 - q2) + \\
& 2*b3^2*p1*q1*(p2^2 + q2^2) + \text{sigm}^2)) + 2*p1*p2*(b2 + b3*(p1 - q1))*q1* \\
& q2*(-2*b1*b3*p2*(b2 + b3*(p1 - q1))*(p1 - q1)^2*q2 -
\end{aligned}$$

$$\begin{aligned}
& (b1*(p1 - q1) + b2*(p2 - q2))*(2*b1^2*p1*q1 + 4*b1*b3*p1*q1*(p2 - q2) + \\
& 2*b3^2*p1*q1*(p2^2 + q2^2) + \text{sigm}^2))* \\
& (b1*(b2^2 + 2*b2*b3*(p1 - q1) + b3^2*(p1^2 + q1^2))*(p2 - q2) + \\
& b3*(b2^2*(p2 + q2)^2 + 2*b2*b3*(p1 - q1)*(p2 + q2)^2 + \\
& b3^2*(p1^2 + q1^2)*(p2 + q2)^2 + 2*\text{sigm}^2)) + \\
& p1*p2*q1*q2*(-2*b3^2*p2*(b2 + b3*(p1 - q1))^2*(p1 - q1)^2*q2 + \\
& (b2^2 - b3^2*(p1 - q1)^2)*(2*b1^2*p1*q1 + 4*b1*b3*p1*q1*(p2 - q2) + \\
& 2*b3^2*p1*q1*(p2^2 + q2^2) + \text{sigm}^2))* \\
& (b1*(b2^2 + 2*b2*b3*(p1 - q1) + b3^2*(p1^2 + q1^2))* \\
& (p2^2 - 4*p2*q2 + q2^2) + b3*(p2 - q2)*(b2^2*(p2^2 + q2^2) + \\
& 2*b2*b3*(p1 - q1)*(p2^2 + q2^2) + b3^2*(p1^2 + q1^2)*(p2^2 + q2^2) + \\
& 2*\text{sigm}^2)) + (b2 + b3*(p1 - q1))* \\
& (4*b1*b3*p2*(b2 + b3*(p1 - q1))*(p1 - q1)*q2 + (b1 + b3*(-p2 + q2))* \\
& (2*b1^2*p1*q1 + 4*b1*b3*p1*q1*(p2 - q2) + 2*b3^2*p1*q1*(p2^2 + q2^2) + \\
& \text{sigm}^2))*(-b3^3*(p1 - q1)*(p1^3*q1*(p2^2 - q2^2)^2 + \\
& 2*p1^4*p2*q2*(p2^2 + q2^2) + 2*p2^2*q1^2*(-1 + q1^2)*q2*(p2^2 + q2^2) + \\
& p1*q1*(p2 - q2)^2*(1 + p2^2*(-2 + q1^2) + 2*p2^2*q1^2*q2 + \\
& (-2 + q1^2)*q2^2) + 2*p1^2*(p2^4*q1^2 + 6*p2^2*q1^2*q2^2 - \\
& p2^2*(1 + 2*q1^2)*q2^3 + q1^2*q2^4 - p2^3*(q2 + 2*q1^2*q2)))) + \\
& 2*b2*b3^2*(-2*p1^4*p2*q2*(p2^2 + q2^2) - 2*p2^2*q1^2*(-1 + q1^2)*q2* \\
& (p2^2 + q2^2) + 2*p1^2*p2*q2*(p2^2*(1 + 2*q1^2) - 8*p2^2*q1^2*q2 + \\
& (1 + 2*q1^2)*q2^2) + p1^3*q1*(p2^4 + 2*p2^2*q2 + q2^2*(-1 + q2^2) + \\
& p2^2*(-1 + 10*q2^2)) + p1*q1*(p2^4*q1^2 - 4*p2^3*q2 + \\
& 2*p2^2*q2*(q1^2 - 2*q2^2) + q1^2*q2^2*(-1 + q2^2) + \\
& p2^2*q1^2*(-1 + 10*q2^2))) + 4*b2*p1*p2*q1*q2* \\
& (2*b2^2*p2*q2 + \text{sigm}^2) - b1*p1*q1*(p2 - q2)* \\
& (-2*b2*b3*(p1^2 + q1^2)*(-1 + p2^2 + 2*p2^2*q2 + q2^2) + \\
& b3^2*(p1 - q1)*(1 + p2^2*(-2 + p1^2 + 2*p1*q1 + q1^2) - \\
& 2*p2*(p1 + q1)^2*q2 + (-2 + p1^2 + 2*p1*q1 + q1^2)*q2^2) + \\
& (p1 - q1)*\text{sigm}^2) - b3*(p1 - q1)* \\
& (2*b2^2*p2*q2*(p2^2*(-1 + p1^2 + 2*p1*q1 + q1^2) - 12*p1*p2*q1*q2 + \\
& (-1 + p1^2 + 2*p1*q1 + q1^2)*q2^2) + \\
& (p2^2*(-1 + p1^2 + 3*p1*q1 + q1^2) - 6*p1*p2*q1*q2 + \\
& (-1 + p1^2 + 3*p1*q1 + q1^2)*q2^2)*\text{sigm}^2)) - \\
& 2*b1*b3*p2*(b2 + b3*(p1 - q1))^2*q2* \\
& (-2*b2^3*p2*(p1 - q1)*q2*(p2^2*(-1 + p1^2 + 2*p1*q1 + q1^2) - \\
& 4*p1*p2*q1*q2 + (-1 + p1^2 + 2*p1*q1 + q1^2)*q2^2) - \\
& 4*b2^2*b3*p2*q2*(p1^4*(p2^2 + q2^2) + q1^2*(-1 + q1^2)*(p2^2 + q2^2) + \\
& p1^3*q1*(p2^2 - 6*p2^2*q2 + q2^2) + p1*q1*(p2^2*(1 + q1^2) - \\
& 6*p2^2*q1^2*q2 + (1 + q1^2)*q2^2) - p1^2*(p2^2*(1 + 2*q1^2) - \\
& 8*p2^2*q1^2*q2 + (1 + 2*q1^2)*q2^2)) - b1*p1*q1*(p2 - q2)* \\
& (-8*b2^2*p1*p2*q1*q2 + 2*b2*b3*(p1 - q1)* \\
& (1 + p2^2*(-2 + p1^2 + 2*p1*q1 + q1^2) - 2*p2*(p1^2 + 6*p1*q1 + q1^2)* \\
& q2 + (-2 + p1^2 + 2*p1*q1 + q1^2)*q2^2) + b3^2*(p1^2 + q1^2)* \\
& (1 + p2^2*(-2 + p1^2 + 2*p1*q1 + q1^2) - 2*p2*(p1^2 + 6*p1*q1 + q1^2)* \\
& q2 + (-2 + p1^2 + 2*p1*q1 + q1^2)*q2^2) + (p1^2 - 4*p1*q1 + q1^2)* \\
& \text{sigm}^2) - b2*(p1 - q1)*(2*b3^2*(p1^4*p2*q2*(p2^2 + q2^2) + \\
& p2^2*q1^2*(-1 + q1^2)*q2*(p2^2 + q2^2) + p1^3*q1*(p2 - q2)^2* \\
& (p2^2 + 4*p2^2*q2 + q2^2) + p1^2*(2*p2^4*q1^2 + 12*p2^2*q1^2*q2^2 - \\
& p2^2*(1 + 6*q1^2)*q2^3 + 2*q1^2*q2^4 - p2^3*(q2 + 6*q1^2*q2)) + \\
& p1*q1*(p2^4*(-2 + q1^2) + 2*p2^3*q1^2*q2 + q2^2 + (-2 + q1^2)*q2^4 + \\
& 2*p2^2*q2*(-1 + q1^2*q2^2) + p2^2*(1 - 2*(2 + 3*q1^2)*q2^2))) + \\
& (p2^2*(-1 + p1^2 + 2*p1*q1 + q1^2) - 4*p1*p2*q1*q2 + \\
& (-1 + p1^2 + 2*p1*q1 + q1^2)*q2^2)*\text{sigm}^2) - \\
& b3*p1*q1*(b3^2*(2*p1^3*q1*(p2 - q2)^4 + 2*p1*q1^3*(p2 - q2)^4 + \\
& p1^4*(p2^2 - q2^2)^2 + p1^2*(2*p2^4*(-1 + q1^2) - 2*p2^2*q2 + q2^2 +
\end{aligned}$$

$$\begin{aligned}
& 2^*(-1 + q1^2)*q2^4 + p2^2*(1 - 4*(1 + q1^2)*q2^2) + \\
& q1^2*(p2^4*(-2 + q1^2) - 2*p2*q2 + q2^2 + (-2 + q1^2)*q2^4 + \\
& p2^2*(1 - 2*(2 + q1^2)*q2^2))) + (p2^2*(-2 + 3*p1^2 + 3*q1^2) - \\
& 6*p2*(p1^2 + q1^2)*q2 + (-2 + 3*p1^2 + 3*q1^2)*q2^2)*\text{sigm}^2) + \\
& b3^2*p2*(b2 + b3*(p1 - q1))^2*q2^2 \\
& (b1*p1*q1*(8*b2^2*p2*q2*(p1^2*p2*q2 + p2*q1^2*q2 - p1*q1*(p2^2 + q2^2)) + \\
& b3^2*(p1^4*(p2 - q2)^2*(p2^2 + q2^2) + 2*p1^3*q1*(p2^4 - 6*p2^3*q2 + \\
& 2*p2^2*q2^2 - 6*p2*q2^3 + q2^4) + 2*p1*q1^3*(p2^4 - 6*p2^3*q2 + \\
& 2*p2^2*q2^2 - 6*p2*q2^3 + q2^4) + q1^2*(-p2^2 + p2^4*q1^2 + \\
& 4*p2*q2 - 2*p2^3*q1^2*q2 - q2^2 + 2*p2^2*q1^2*q2^2 - \\
& 2*p2*q1^2*q2^3 + q1^2*q2^4) + p1^2*(-p2^2 + 2*p2^4*q1^2 + \\
& 4*p2*q2 - 4*p2^3*q1^2*q2 - q2^2 + 4*p2^2*q1^2*q2^2 - \\
& 4*p2*q1^2*q2^3 + 2*q1^2*q2^4)) + \\
& 2*b2*b3*(p1^3*(p2 - q2)^2*(p2^2 + q2^2) + \\
& p1^2*q1*(p2^4 - 10*p2^3*q2 + 2*p2^2*q2^2 - 10*p2*q2^3 + q2^4) + \\
& q1*(-(p2^4*q1^2) + 2*p2^3*q1^2*q2 + q2^2 - q1^2*q2^4 + \\
& p2^2*(1 - 2*q1^2*q2^2) + 2*p2*q2*(-2 + q1^2*q2^2)) - \\
& p1*(p2^4*q1^2 - 10*p2^3*q1^2*q2 + q2^2 + q1^2*q2^4 + \\
& p2^2*(1 + 2*q1^2*q2^2) - 2*p2*q2*(2 + 5*q1^2*q2^2))) + \\
& (p1^2 - 4*p1*q1 + q1^2)*(p2^2 + q2^2)*\text{sigm}^2) + \\
& (p2 - q2)*(2*b2^3*p2*(p1 - q1)*q2*(-1 + p2^2*q1^2 + 2*p2*q1^2*q2 + \\
& q1^2*q2^2 + p1^2*(p2 + q2)^2 + 2*p1*q1*(p2^2 + q2^2)) + \\
& 4*b2^2*b3*p2*q2*(p1*(q1 + q1^3*(p2 - q2)^2) + p1^3*q1*(p2 - q2)^2 + \\
& p1^4*(p2 + q2)^2 + q1^2*(-1 + p2^2*q1^2 + 2*p2*q1^2*q2 + \\
& q1^2*q2^2) - p1^2*(1 + 2*p2^2*q1^2 - 4*p2*q1^2*q2 + \\
& 2*q1^2*q2^2)) + b3*p1*q1*(b3^2*(p1^2 + q1^2)*(p2^2 + q2^2)* \\
& (-1 + p2^2*q1^2 + 2*p1*q1*(p2 - q2)^2 + 2*p2*q1^2*q2 + q1^2*q2^2 + \\
& p1^2*(p2 + q2)^2) + (-2 + 3*p2^2*q1^2 + 3*q1^2*q2^2 + \\
& 3*p1^2*(p2^2 + q2^2))*\text{sigm}^2) + b2*(p1 - q1)* \\
& (2*b3^2*(p1^4*p2*q2*(p2 + q2)^2 + p2*q1^2*q2*(-1 + p2^2*q1^2 + \\
& 2*p2*q1^2*q2 + q1^2*q2^2) + p1*q1*(p2^2 + q2^2)* \\
& (-1 + p2^2*q1^2 + 4*p2*q1^2*q2 + q1^2*q2^2) + \\
& p1^3*q1*(p2^4 + 4*p2^3*q2 + 2*p2^2*q2^2 + 4*p2*q2^3 + q2^4) + \\
& p1^2*(2*p2^4*q1^2 - 2*p2^3*q1^2*q2 + 8*p2^2*q1^2*q2^2 + \\
& 2*q1^2*q2^4 - p2*(q2 + 2*q1^2*q2^3))) + \\
& (-1 + p2^2*q1^2 + 2*p2*q1^2*q2 + q1^2*q2^2 + p1^2*(p2 + q2)^2 + \\
& 2*p1*q1*(p2^2 + q2^2))*\text{sigm}^2))) + b3*(b2 + b3*(p1 - q1))* \\
& (2*b1^2*p1*q1 + 4*b1*b3*p1*q1*(p2 - q2) + 2*b3*p2*(b2 + b3*(p1 - q1))* \\
& (p1 - q1)*q2 + 2*b3^2*p1*q1*(p2^2 + q2^2) + \text{sigm}^2)* \\
& (b1*p1*q1*(-2*b2*b3*(p1^2 + q1^2)*(p2^4 - 2*p2^3*q2 - \\
& 2*p2*q2*(-2 + q2^2) + q2^2*(-1 + q2^2) + p2^2*(-1 + 2*q2^2)) + \\
& b3^2*(-(p1^3*(p2 - q2)^2*(p2^2 + q2^2)) - p1^2*q1*(p2 - q2)^2* \\
& (p2^2 + q2^2) + p1*(p2^4*q1^2 - 2*p2^3*q1^2*q2 + q2^2 + q1^2*q2^4 - \\
& 2*p2*q2*(2 + q1^2*q2^2) + p2^2*(1 + 2*q1^2*q2^2)) + \\
& q1*(p2^4*q1^2 - 2*p2^3*q1^2*q2 + q2^2*(-1 + q1^2*q2^2) + \\
& p2^2*(-1 + 2*q1^2*q2^2) + p2*(4*q2 - 2*q1^2*q2^3))) - \\
& (p1 - q1)*(8*b2^2*p2^2*q2^2 + (p2^2 + q2^2)*\text{sigm}^2)) - \\
& (p2 - q2)*(2*b2*b3^2*(p1^4*p2*q2*(1 + p2^2 + 2*p2*q2 + q2^2) + \\
& p2*q1^2*q2*(-2 + q1^2*(1 + p2^2 + 2*p2*q2 + q2^2)) + \\
& p1^3*q1*(p2^4 + 2*p2^3*q2 + 2*p2*q2^3 + q2^2*(-1 + q2^2) - \\
& p2^2*(1 + 2*q2^2)) - 2*p1^2*p2*q2* \\
& (1 + q1^2*(-1 + 3*p2^2 - 2*p2*q2 + 3*q2^2)) + \\
& p1*(p2^4*q1^3 + 2*p2^3*q1^3*q2 + q1^3*q2^2*(-1 + q2^2) - \\
& p2^2*q1^3*(1 + 2*q2^2) + 2*p2*q1*q2*(2 + q1^2*q2^2))) + \\
& b3^3*(p1 - q1)*(2*p1^4*p2*q2 + 2*p2*q1^2*(-1 + q1^2)*q2 + \\
& p1^3*q1*(p2 + q2)^2*(p2^2 + q2^2) +
\end{aligned}$$



$$\begin{aligned}
& p1*q1*(p2^4*q1^2 + 2*p2^3*q1^2*q2 + q2^2*(-1 + q1^2*q2^2) + \\
& 2*p2*q2*(2 + q1^2*q2^2) + p2^2*(-1 + 2*q1^2*q2^2)) + \\
& 2*p1^2*(p2^4*q1^2 - 2*p2^3*q1^2*q2 + 2*p2^2*q1^2*q2^2 + q1^2*q2^4 - \\
& p2*(q2 - 2*q1^2*q2 + 2*q1^2*q2^3)) + \\
& b2*(-4*p1*p2*q1*q2 + p1^2*(-1 + p2^2 + 2*p2*q2 + q2^2) + \\
& q1^2*(-1 + p2^2 + 2*p2*q2 + q2^2))*(2*b2^2*p2*q2 + \text{sigm}^2) + \\
& b3*(p1 - q1)*(2*b2^2*p2*q2*(-1 + 2*p1*q1*(p2 - q2)^2 + \\
& p1^2*(-1 + 2*p2^2 + 4*p2*q2 + 2*q2^2) + \\
& q1^2*(-1 + 2*p2^2 + 4*p2*q2 + 2*q2^2)) + \\
& (-1 + p1^2 + q1^2 + 3*p1*q1*(p2^2 + q2^2))*\text{sigm}^2))))/ \\
& (2*\text{sqrt}(B)*(p1*q1*(2*b2^2*p2*q2 + 4*b2*b3*p2*(p1 - q1)*q2 + \\
& 2*b3^2*p2*(p1^2 + q1^2)*q2 + \text{sigm}^2))^(3/2)* \\
& \text{sqrt}((p2*(b2 + b3*(p1 - q1))^2*q2)/(2*b1^2*p1*q1 + \\
& 4*b1*b3*p1*q1*(p2 - q2) + 2*b3^2*p1*q1*(p2^2 + q2^2) + \text{sigm}^2))* \\
& (2*b1^2*p1*q1 + 4*b1*b3*p1*q1*(p2 - q2) + 2*b3^2*p1*q1*(p2^2 + q2^2) + \\
& \text{sigm}^2)^2)
\end{aligned}$$
